# Supplementary material for: Efficacy and cost-effectiveness of an online mindfulness program (MindOnLine) to reduce fear of recurrence among people with cancer: study protocol for a randomised controlled trial
Source: PubMed Central journal article supplement — BMJ Open. 2022 Jan 12;12(1):e057212. doi: 10.1136/bmjopen-2021-057212 (PMC8756286; doi:10.1136/bmjopen-2021-057212), 2022-01-12
Supplement: bmjopen-2021-057212.draft_revisions.pdf [file bmjopen-2021-057212.draft_revisions.pdf]

# BMJ Open

BMJ Open is committed to open peer review. As part of this commitment we make the peer review history of every article we publish publicly available.

When an article is published we post the peer reviewers' comments and the authors' responses online. We also post the versions of the paper that were used during peer review. These are the versions that the peer review comments apply to.

The versions of the paper that follow are the versions that were submitted during the peer review process. They are not the versions of record or the final published versions. They should not be cited or distributed as the published version of this manuscript.

BMJ Open is an open access journal and the full, final, typeset and author-corrected version of record of the manuscript is available on our site with no access controls, subscription charges or pay-per-view fees (<http://bmjopen.bmj.com>).

If you have any questions on BMJ Open's open peer review process please email [info.bmjopen@bmj.com](mailto:info.bmjopen@bmj.com)

# BMJ Open

## **Efficacy and cost-effectiveness of an online mindfulness program (MindOnLine) to reduce fear of recurrence among people with cancer: study protocol for a randomized controlled trial**

|                               |                                                                                                                                                                                                                                                                                                                                                                                                                                                                                                                                                                                                                                                                                                                                                                                                                                                                                                                                                                                                                                                                                                                                                                                                                                                                                                                                                                                                                                                                                                                                                                                                                                                                                                                                                                                                                                                                                                                                                                                                                                                                                                                                                                                                                                                                                                                               |
|-------------------------------|-------------------------------------------------------------------------------------------------------------------------------------------------------------------------------------------------------------------------------------------------------------------------------------------------------------------------------------------------------------------------------------------------------------------------------------------------------------------------------------------------------------------------------------------------------------------------------------------------------------------------------------------------------------------------------------------------------------------------------------------------------------------------------------------------------------------------------------------------------------------------------------------------------------------------------------------------------------------------------------------------------------------------------------------------------------------------------------------------------------------------------------------------------------------------------------------------------------------------------------------------------------------------------------------------------------------------------------------------------------------------------------------------------------------------------------------------------------------------------------------------------------------------------------------------------------------------------------------------------------------------------------------------------------------------------------------------------------------------------------------------------------------------------------------------------------------------------------------------------------------------------------------------------------------------------------------------------------------------------------------------------------------------------------------------------------------------------------------------------------------------------------------------------------------------------------------------------------------------------------------------------------------------------------------------------------------------------|
| Journal:                      | <i>BMJ Open</i>                                                                                                                                                                                                                                                                                                                                                                                                                                                                                                                                                                                                                                                                                                                                                                                                                                                                                                                                                                                                                                                                                                                                                                                                                                                                                                                                                                                                                                                                                                                                                                                                                                                                                                                                                                                                                                                                                                                                                                                                                                                                                                                                                                                                                                                                                                               |
| Manuscript ID                 | bmjopen-2021-057212                                                                                                                                                                                                                                                                                                                                                                                                                                                                                                                                                                                                                                                                                                                                                                                                                                                                                                                                                                                                                                                                                                                                                                                                                                                                                                                                                                                                                                                                                                                                                                                                                                                                                                                                                                                                                                                                                                                                                                                                                                                                                                                                                                                                                                                                                                           |
| Article Type:                 | Protocol                                                                                                                                                                                                                                                                                                                                                                                                                                                                                                                                                                                                                                                                                                                                                                                                                                                                                                                                                                                                                                                                                                                                                                                                                                                                                                                                                                                                                                                                                                                                                                                                                                                                                                                                                                                                                                                                                                                                                                                                                                                                                                                                                                                                                                                                                                                      |
| Date Submitted by the Author: | 19-Sep-2021                                                                                                                                                                                                                                                                                                                                                                                                                                                                                                                                                                                                                                                                                                                                                                                                                                                                                                                                                                                                                                                                                                                                                                                                                                                                                                                                                                                                                                                                                                                                                                                                                                                                                                                                                                                                                                                                                                                                                                                                                                                                                                                                                                                                                                                                                                                   |
| Complete List of Authors:     | <p>Livingston, Patricia; Deakin University, Centre for Quality and Patient Safety Research in the Institute for Health Transformation; Deakin University, Faculty of Health</p> <p>Russell, Lahiru; Deakin University, Centre for Quality and Patient Safety Research in the Institute for Health Transformation</p> <p>Orellana, Liliana; Deakin University, Biostatistics Unit, Faculty of Health</p> <p>Winter, Natalie; Deakin University, Centre for Quality and Patient Safety Research in the Institute for Health Transformation</p> <p>Jefford, Michael; Peter MacCallum Cancer Centre, Medical Oncology</p> <p>Girgis, Afaf; Ingham Institute for Applied Medical Research, University of New South Wales, Centre for Oncology Education and Research Translation (CONCERT)</p> <p>Austin, David ; Deakin University Faculty of Health</p> <p>O, Eric; Deakin University Faculty of Health</p> <p>Mihalopoulos, Cathrine; Deakin University Faculty of Health, School of Health and Social Development</p> <p>Ugalde, Anna; Deakin University, Centre for Quality and Patient Safety Research in the Institute for Health Transformation</p> <p>Chambers, Richard; Monash University</p> <p>Phipps-Nelson, Jo; Peter MacCallum Cancer Centre</p> <p>Heath , Dishan; Western Health</p> <p>Botti, Mari; Deakin University, Centre for Quality and Patient Safety Research in the Institute for Health Transformation; Epworth HealthCare</p> <p>Rasmussen, Bodil; Deakin University, Centre for Quality and Patient Safety Research in the Institute for Health Transformation; Western Health</p> <p>Whitfield, Kathryn; Department of Health and Human Services, Cancer Specialty Programs, Medical Research and International Health</p> <p>Ftanou, Maria; Peter MacCallum Cancer Centre, Psychosocial Oncology Department</p> <p>Smith, Allan; Ingham Institute for Applied Medical Research, University of New South Wales, Centre for Oncology Education and Research Translation (CONCERT)</p> <p>Pilatti, Kirsten; Breast Cancer Network Australia</p> <p>Schmitt, Jacqueline; Prostate Cancer Foundation Australia</p> <p>Sanderson, Brad; Smiling Mind</p> <p>Stephenson, Paula; Deakin University, Centre for Quality and Patient Safety Research in the Institute for Health Transformation; Epworth</p> |

1  
2  
3  
4  
5  
6  
7  
8  
9  
10  
11  
12  
13  
14  
15  
16  
17  
18  
19  
20  
21  
22  
23  
24  
25  
26  
27  
28  
29  
30  
31  
32  
33  
34  
35  
36  
37  
38  
39  
40  
41  
42  
43  
44  
45  
46  
47  
48  
49  
50  
51  
52  
53  
54  
55  
56  
57  
58  
59  
60

|           |                                                                                                                                                                                                                                                        |
|-----------|--------------------------------------------------------------------------------------------------------------------------------------------------------------------------------------------------------------------------------------------------------|
|           | HealthCare<br>Singh, Madhu; Andrew Love Cancer Centre, Barwon Health, University<br>Hospital<br>Campbell, David; Andrew Love Cancer Centre, Barwon Health, University<br>Hospital<br>White, Vicki ; Deakin University School of Psychology, Psychology |
| Keywords: | ONCOLOGY, Health economics < HEALTH SERVICES ADMINISTRATION &<br>MANAGEMENT, World Wide Web technology < BIOTECHNOLOGY &<br>BIOINFORMATICS                                                                                                             |
|           |                                                                                                                                                                                                                                                        |

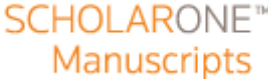

**Title**

Efficacy and cost-effectiveness of an online mindfulness program (MindOnLine) to reduce fear of recurrence among people with cancer: study protocol for a randomized controlled trial

**Authors**

Livingston PM<sup>\*1,2</sup>, Russell L<sup>1</sup>, Orellana L<sup>3</sup>, Winter N<sup>1</sup>, Jefford M<sup>5</sup>, Girgis A<sup>5</sup>, Austin DW<sup>2</sup>, Eric O<sup>2</sup>, Mihalopoulos C<sup>6</sup>, Ugalde A<sup>1</sup>, Chambers R<sup>7</sup>, Phipps-Nelson J<sup>4</sup>, Herath D<sup>8</sup>, Botti M<sup>1,9</sup>, Rasmussen B<sup>1,8</sup>, Whitfield K<sup>10</sup>, Ftanou M<sup>4</sup>, Smith AB<sup>5</sup>, Pilatti K<sup>11</sup>, Schmitt J<sup>12</sup>, Sanderson B<sup>13</sup>, Stephenson P<sup>1,9</sup>, Singh M<sup>14</sup>, Campbell D<sup>14</sup>, White V<sup>15</sup>

<sup>1</sup>Centre for Quality and Patient Safety Research in the Institute for Health Transformation; 1 Gheringhap St, Geelong, Victoria, 3220, Australia.

<sup>2</sup>Faculty of Health, Deakin University, Geelong, Vic, Australia

<sup>3</sup>Biostatistics Unit, Faculty of Health, Deakin University, Geelong, Vic, Australia

<sup>4</sup>Peter MacCallum Cancer Centre, Melbourne, Vic, Australia

<sup>5</sup>Centre for Oncology Education and Research Translation (CONCERT), Ingham Institute for Applied Medical Research, South Western Sydney Clinical School, University of New South Wales, NSW, Australia

<sup>6</sup>School of Health and Social development, Faculty of Health, Deakin University, Geelong, Vic, Australia

<sup>7</sup>Monash University, Melbourne, Australia

<sup>8</sup>Western Health, Melbourne, Vic, Australia

<sup>9</sup>Epworth HealthCare, Melbourne, Vic, Australia

<sup>10</sup>Cancer Specialty Programs, Medical Research and International Health, Department of Health and Human Services, Melbourne, Vic, Australia

<sup>11</sup>Breast Cancer Network Australia, Melbourne, Vic, Australia

<sup>12</sup>Prostate Cancer Foundation Australia, Melbourne, Vic, Australia

<sup>13</sup>Smiling Mind

<sup>14</sup>Andrew Love Cancer Centre, Barwon Health, University Hospital, Geelong, Vic, Australia

<sup>15</sup>School of Psychology, Faculty of Health, Deakin University, Geelong, Vic, Australia

\*Corresponding Author: Patricia Livingston, Centre for Quality and Patient Safety Research in the Institute for Health Transformation, 1 Gheringhap St, Geelong, Victoria Australia, Faculty of Health, Deakin University, Geelong, Vic, Australia. Email: trish.livingston@deakin.edu.au

## 35 **Abstract**

36 **Introduction:** Fear of cancer recurrence (FCR) is a common condition among cancer survivors  
37 that can lead to significant levels of distress, anxiety and depression. Online mindfulness  
38 programs may provide the mechanism to support cancer survivors manage FCR and distress,  
39 and improve people's wellbeing over the short, medium and long term. The primary aim of  
40 this study is to determine the potential efficacy of MindOnLine, a 9 session mindfulness-based  
41 program for survivors of breast, prostate and colorectal cancer. A formal economic program  
42 will also be conducted.

43 **Methods and analysis:** A single-blind randomized controlled trial to determine the efficacy  
44 and cost-efficacy of a MindOnLine program for cancer survivors. A total of 400 people living  
45 with cancer will be recruited via online advertisements on social media platforms, peak  
46 consumer advocacy groups, or through outpatient services at healthcare providers across  
47 Victoria. People will be randomly allocated to either the MindOnLine program (n=200) or  
48 waitlist control (n=200). Participant assessments will occur at baseline, at 9 weeks and 9-month  
49 follow up. The primary outcome is change in Fear of Recurrence Index Score total score  
50 between baseline and 9 weeks; secondary outcomes include changes in depression and anxiety,  
51 quality of life and mindfulness. The economic analysis comprises a cost-consequences analysis  
52 where all outcomes will be compared to costs.

53 **Ethics and dissemination:** Ethics approval was obtained from the Peter MacCallum Cancer  
54 Centre (20-53) and Deakin University (2020-284). Findings will be disseminated in peer  
55 reviewed journals and among key stakeholder organisations including hospitals, cancer and  
56 community organisations and Government. If successful the project will be rolled out  
57 nationally with a formal implementation plan.

1  
2  
3 58 **Australian New Zealand Clinical Trials Registry:** 12620000645954p. Registered 06 June  
4  
5 59 2020,

6  
7  
8 60 <https://www.anzctr.org.au/Trial/Registration/TrialReview.aspx?id=379520&isReview=true>

9  
10 61 **Keywords:** mindfulness, cancer, fear of cancer recurrence, online; economics of cancer;  
11  
12 62 supportive care; web-based platforms

## 13 14 15 16 63 **Article Summary**

### 17 18 64 **Strengths and limitations of this study**

- 19  
20 65 • Development of the intervention through a literature review, findings from a pilot study,  
21  
22 66 involvement of consumer advocacy groups and Government bodies are the study's strengths.  
23  
24 67 This will ensure translation of the program into policy and practice if shown to be  
25  
26 68 efficacious.
- 27  
28  
29 69 • Involvement of consumer advocacy groups to support recruitment.
- 30  
31 70 • This study will employ a single-blind randomized controlled trial to determine the efficacy  
32  
33 71 and cost-efficacy of MindOnLine.
- 34  
35 72 • Advances in social platforms, smartphone technology and web-based programming can  
36  
37 73 change substantially in a short period and while this may affect the actual online platform  
38  
39 74 used, we do not consider this will influence the program content or delivery mechanisms.  
40  
41  
42  
43  
44  
45  
46  
47  
48  
49  
50  
51  
52  
53  
54  
55  
56  
57  
58  
59  
60

## 75 **Introduction**

76 Over one million Australians are cancer survivors, and this population is expected to grow  
77 substantially over the next 20 years due to an ageing population and improved community-  
78 based screening programs and treatments.[1] A cancer diagnosis can cause people to confront  
79 their own mortality, often for the first time,[2] so it may be unsurprising that three quarters of  
80 cancer survivors experience fear of cancer recurrence (FCR) and 49% report moderate to high  
81 levels of fear,[3] as well as high levels of clinical depression [3]and anxiety.[4]

82  
83 FCR is a highly prevalent and persistent condition that can result in significant levels of anxiety  
84 and depression across the disease trajectory.[5] It is imperative to address this issue and our  
85 recent work into early psychosocial support indicates it may be possible to significantly reduce  
86 FCR through an online mindfulness program.[6] Mindfulness is a state of mind in which one  
87 pays attention to the present experience in a nonjudgmental, curious, and accepting way. Some  
88 studies have shown mindfulness is associated with improved mental health outcomes and  
89 management of the emotional consequences of cancer, [7, 8] while other have found no  
90 effect.[9]

91  
92 Mindfulness-based interventions consist of regular informal and formal mindfulness  
93 meditation practices and are supported by educational principles that are person and  
94 relationship-centred.[10] Research into the use of mindfulness has mostly evaluated face-to-  
95 face programs which are time-intensive, of limited accessibility and costly.[11] Online  
96 mindfulness programs represent a potentially cost-effective mechanism to help cancer  
97 survivors manage FCR and distress, and improve mental wellbeing over the short, medium  
98 and long term.[2] While an online mindfulness-based cognitive therapy (MBCT) intervention  
99 was found to be as effective as a face-to-face MBCT in reducing psychological distress and

1  
2  
3 100 FCR in cancer patients [12] there is a lack of robust evidence assessing the effectiveness of a  
4  
5 101 general online mindfulness program for cancer survivors, limiting capacity for implementation  
6  
7  
8 102 and dissemination.[13, 14]  
9

10 103  
11  
12 104 The aim of this study is to conduct a randomised controlled trial of *MindOnLine*, an online 9  
13  
14 105 session mindfulness-based intervention, for survivors of breast, prostate and colorectal cancer,  
15  
16  
17 106 to determine the effectiveness and cost-effectiveness of the program.  
18

19 107 *Preliminary work*

20  
21 108 To inform the development of *MindOnLine*, we undertook a systematic review of  
22  
23 109 methodologies for internet based mindfulness interventions.[15] This review showed a dearth  
24  
25  
26 110 of studies with long-term follow up periods. Our team also conducted an exploratory study on  
27  
28 111 the knowledge of, attitudes toward and behaviours regarding meditation among patients with  
29  
30 112 melanoma.[16] Our study of 291 cancer survivors recruited at a single tertiary cancer hospital  
31  
32  
33 113 found that a key barrier to engaging with meditation was a lack of knowledge about its practice.  
34  
35 114 Findings also indicated interest in an online meditation-based intervention once informed about  
36  
37 115 possible benefits of meditation for people with cancer. Those interested in an online  
38  
39 116 meditation-based program reported higher perceived stress, indicating a need for such a  
40  
41  
42 117 program.  
43  
44  
45 118

46  
47 119 We conducted a pilot 6-week RCT [6] to determine the feasibility and acceptability of  
48  
49 120 *MindOnLine*, The secondary aims were to explore intervention impacts on FCR, worry, and  
50  
51 121 perceived stress compared to usual care. Overall, 69 melanoma survivors agreed to participate,  
52  
53 122 and 46 participants were randomised into the intervention group (2:1). Scores on all FCR  
54  
55 123 Inventory (FCRI) subscales reduced in the intervention group, with the severity subscale  
56  
57 124 decreasing significantly compared to the control group (-2.6, 95% CI=(-4.4, -0.7); p=0.008)  
58  
59  
60



1  
2  
3 125 after 6 weeks. The total FCRI score also showed a decrease albeit non-significant ( $-6.2$ , 95%  
4  
5 126  $CI=(-13.12, 0.68)$ ,  $p=0.07$ ). Previous studies have indicated that a 4.1 points decrease on the  
6  
7  
8 127 severity scale is a clinically important change.[17]  
9

10 128  
11  
12 129 Based on participant feedback regarding the benefits of mindfulness practice and the  
13  
14 130 suggestion of a maintenance period to enhance sustainability of the effects, *MindOnLine* was  
15  
16 131 expanded to a 9-week program with the last 3 weeks revisiting concepts already explored in  
17  
18 132 the program and supporting regular practice.  
19  
20  
21  
22

## 23 133 **Methods and analysis**

### 24 134 **Aims and Hypotheses**

25  
26 135 The aims of this study are to determine the effect of *MindOnLine* on FCR, anxiety and  
27  
28 136 depression in cancer survivors. The specific aims are:

29  
30 137 **Aim 1:** To evaluate the impact of the *MindOnLine* intervention on the primary outcome (FCR),  
31  
32 138 measured using the FCRI total score [18] at the end of the 9-week intervention period.

33  
34 139 **HYPOTHESIS 1:** Participants receiving the intervention will report lower average FCRI total  
35  
36 140 scores at 9 weeks, compared to the waitlist group.

37  
38 141 **Aim 2:** To evaluate the impact of *MindOnLine* on secondary outcomes at nine weeks: 1)  
39  
40 142 Anxiety and Depression, using the Patient Health Questionnaire (PHQ-9) [19] and Generalised  
41  
42 143 Anxiety Disorder (GAD-7) Scale; [20] 2) Quality of Life (QoL) measured by AQOL-4D; [21]  
43  
44 144 and 3) Mindfulness, using Cognitive and Affective Mindfulness Scale-Revised (CAMS-  
45  
46 145 R). [22] **HYPOTHESIS 2:** Compared to the waitlist group, participants in the intervention group  
47  
48 146 will report improvement in all of the secondary outcomes at nine weeks.  
49

50 147 **Aim 3:** To assess if the intervention effects on the primary and secondary outcomes are  
51  
52 148 sustained at the nine-month follow-up. **HYPOTHESIS 3:** Compared to the waitlist group,  
53  
54  
55  
56  
57  
58  
59  
60

1  
2  
3 149 participants in the intervention group will report sustained improvement in primary and  
4  
5 150 secondary outcomes at nine months.  
6

7  
8 151 **Aim 4:** To assess, from a health sector and broader societal perspective, the cost-effectiveness  
9  
10 152 of *MindOnLine*. **HYPOTHESIS 4:** Compared to the waitlist group, *MindOnLine* will be cost-  
11  
12 153 effective with an incremental cost-effectiveness ratio likely to fall below the commonly used  
13  
14 154 threshold of \$28,000 - \$50,000/Quality of Life Year (QALY).  
15  
16

17 155  
18 156 **Study Design**

19  
20 157 This study is a randomised controlled trial, to test the effectiveness and cost-effectiveness of  
21  
22 158 *MindOnLine* compared to usual care on FCR, anxiety, depression and QoL among people  
23  
24 159 diagnosed with breast, prostate or colorectal cancer. Overall, 400 patients will be recruited with  
25  
26 160 200 patients randomly allocated to the intervention group and 200 to the waitlist group (usual  
27  
28 161 care only). The intervention group will receive usual care and the online mindfulness program.  
29  
30 162 Primary and secondary outcomes will be collected at baseline, nine weeks and nine months  
31  
32 163 post randomisation. Nine months corresponds to approximately six months following the end  
33  
34 164 of the intervention period. Following completion of the study (9 months), participants in the  
35  
36 165 waitlist group will be offered the *MindOnLine* intervention (Figure 1).  
37  
38  
39  
40

41 166

42  
43 167 **Participants**

44  
45 168 People with a diagnosis of breast, prostate or colorectal cancer will be recruited via online  
46  
47 169 advertisements on social media platforms, peak consumer advocacy groups for each cancer  
48  
49 170 Breast Cancer Network Australia (BCNA), or Prostate Cancer Foundation Australia (PCFA),  
50  
51 171 Bowel Cancer Australia social media platforms and colorectal cancer support groups, or  
52  
53 172 through outpatient services at healthcare providers across Victoria, see Figure 1.  
54  
55  
56  
57  
58  
59  
60

1  
2  
3  
4  
5  
6  
7  
8  
9  
10  
11  
12  
13  
14  
15  
16  
17  
18  
19  
20  
21  
22  
23  
24  
25  
26  
27  
28  
29  
30  
31  
32  
33  
34  
35  
36  
37  
38  
39  
40  
41  
42  
43  
44  
45  
46

173 **Figure 1.** Study flowchart

174

175

176

177

178

179

180

181

182

183

184

185

186

187

188

(Insert Figure 1 here)

For peer review only

FCRI (Fear of Cancer Recurrence Inventory); GAD-7 (General Anxiety and Distress scale; PHQ-9 (Patient Health Questionnaire); CAMS-R (Cognitive and Affective Mindfulness Scale – Revised); AQoL-4D (Assessment of Quality of Life – 4 Dimensions)

1  
2  
3 189 Inclusion criteria  
4  
5 190 Adults, aged 18 year of older, living in Australia, who completed active treatment for Stage  
6  
7 191 1-3 breast, prostate or colorectal cancer (CRC), (trastuzumab/similar, and hormone treatment  
8  
9 192 exempt) within the past 5 years; have internet access and a FCRI severity score  $\geq 13$ , indicating  
10  
11 193 clinically significant FCR.[18] Our pilot study showed 74% of participants with melanoma  
12  
13 194 were identified as having clinically significant FCR.[6]  
14  
15  
16  
17 195

18  
19 196 Exclusion criteria  
20  
21 197 Insufficient English language skills to understand videos presented in English, complete  
22  
23 198 surveys in English or living with advanced cancer (Stage IV or metastatic disease).  
24  
25  
26  
27

## 28 200 **Recruitment procedures**

29 201 Multiple methods will be applied to recruit people to the study:

- 30 202 1) online through *MindOnLine* social media pages including Facebook, Instagram, Twitter,  
31  
32 203 Reddit and LinkedIn  
33  
34 204 2) sharing recruitment flyers through BCNA and PCFA social media platforms, and Australian  
35  
36 205 based cancer groups  
37  
38 206 3) email invitations sent to BCNA and PCFA supporters (and colorectal cancer support groups)  
39  
40 207 and cancer registries  
41  
42 208 4) paid Facebook and Instagram advertising  
43  
44 209 5) through outpatient clinics, chemotherapy and radiotherapy units and rooms of oncologists  
45  
46 210 and surgeons at cancer treatment centres.  
47  
48  
49

50  
51 211 Online recruitment procedure

- 52 212 1) The *MindOnLine* social media pages will be shared among social networks and will allow  
53  
54 213 people to post questions about the project. 2) A recruitment flyer will be distributed by BCNA,  
55  
56 214 PCFA, Bowel Cancer Australia and colorectal cancer Facebook support groups using their  
57  
58  
59  
60

1  
2  
3 215 existing social media platforms. 3) Study invitations will be sent to supporters registered with  
4  
5 216 BCNA and PCFA who have indicated an interest in learning about research projects. 4) Paid  
6  
7 217 advertisements will run throughout the recruitment period on Facebook, Instagram and Twitter  
8  
9 218 to distribute the project details to a wider audience. The use of paid advertisements in health  
10  
11 219 research is becoming popular and a systematic review has shown this to be an effective  
12  
13 220 recruitment strategy.[23]

14  
15  
16  
17 221 In all online recruitment methods, people will have access to the recruitment flyer, which will  
18  
19 222 provide a brief overview of the study, the link to the *MindOnLine* registration page and the  
20  
21 223 contact number of the project manager.  
22

23  
24 224

25  
26 225 Health service recruitment procedures

27  
28 226 If recruitment across social media platforms, advertisements and peak consumer advocacy  
29  
30 227 groups does not generate sufficient participation levels, participating health services  
31  
32 228 oncologists or surgeons involved in the project, will support the recruitment process. The  
33  
34 229 research assistant (RA) at each site will screen patients and confirm eligibility of patients with  
35  
36 230 treating clinicians or with nurses working in the outpatient units. RAs will then contact patients  
37  
38 231 by phone and interested patients will be emailed the study details with a link to the study  
39  
40 232 webpage and registration page). If there is no response from patients, a message will be left  
41  
42 233 on their phone. Two further attempts to reach patients will be made (a week apart), and after a  
43  
44 234 third unsuccessful attempt no further contact will be made. If patients have not enrolled in the  
45  
46 235 study within two weeks, one follow-up phone call will be made to answer any queries patients  
47  
48 236 may have about the study and to assist with registration. We have used similar screening and  
49  
50 237 recruitment approaches in previous studies and they were found them to be acceptable and  
51  
52 238 successful.[6] We anticipate a recruitment period of 18-months.  
53  
54  
55  
56  
57

58 239  
59  
60

1  
2  
3 240 Consent and screening  
4

5 241 Once directed to the *MindOnLine* registration page, participants will be presented with the plain  
6  
7 242 language statement and then asked to provide consent. Potential participants will be asked to  
8  
9 243 provide basic demographic and disease information allowing screening to ensure they meet  
10  
11 244 study eligibility criteria. Potential participants will also complete the severity subscale of the  
12  
13 245 FCRI to allow those with scores  $\geq 13$  to be screening into the study. Those screened into the  
14  
15 246 study will provide their email address and contact number, and directed to the baseline  
16  
17 247 questionnaires. People who are not eligible will receive an online message thanking them for  
18  
19 248 their interest in the study and referring them to local support services provided by leading  
20  
21 249 cancer charities should they require support.  
22  
23  
24  
25

26 250

27  
28 251 **Randomisation**  
29

30 252 Eligible participants will be allocated to treatment groups using random sequences embedded  
31  
32 253 in the online survey platform Qualtrics, ensuring allocation concealment. Randomisation  
33  
34 254 (using stratified random permuted blocks) will be conducted in blocks of size 2, stratified by  
35  
36 255 cancer type (breast, prostate, CRC) and age ( $<60$ ;  $\geq 60$  years old). Participants will be unblinded  
37  
38 256 to group assignment, while researchers and data analysts will be blinded to the group condition.  
39  
40

41 257

42  
43  
44 258 **Control group**  
45

46 259 Participants allocated to the waitlist group will receive usual care. Following randomisation,  
47  
48 260 they will receive an email with a list of services they may contact for information and support.  
49  
50 261 They will be informed that they will be granted access to *MindOnLine* intervention in 9-  
51  
52 262 month's time.  
53

54  
55 263  
56  
57  
58  
59  
60

264 **Intervention group – MindOnLine program**

265 Participants allocated to the intervention will be provided with the link to *MindOnLine*, which  
 266 comprises three main components:

267 (1) an educational component to increase participants' knowledge about the science and  
 268 practice of mindfulness and how it may benefit them in everyday life;

269 (2) a formal mindfulness meditation practice to improve awareness and emotion regulation;  
 270 and

271 (3) an informal practice to teach participants how to bring mindfulness to daily activities.

272 A new theme is introduced each week, with a new meditation practice which participants will  
 273 be encouraged to undertake every day *The MindOnLine* program is detailed in Table 1.

274

275 Table 1- Weekly content of the *MindOnLine* Program

| Week | Theme                       | Meditation                               | Daily practice                              |
|------|-----------------------------|------------------------------------------|---------------------------------------------|
| 1    | Introduction to mindfulness | Breath                                   | Being present with the experience           |
| 2    | Reducing stress             | Body Scan                                | Notice how the body responds to stress      |
| 3    | Relating to emotions        | Working mindfully with emotions          | Noticing the cycle of emotions              |
| 4    | Self-compassion             | Self-compassion                          | Notice self-criticism                       |
| 5    | Communicating mindfully     | Listening/ Sound meditations             | Bringing attention back to the conversation |
| 6    | Living mindfully            | Practising with gentleness and patience  | Pause throughout the day                    |
| 7    | Reducing worries            | Mindfully working with worries and fears | Notice when caught up overthinking          |

|   |                            |                            |                                           |
|---|----------------------------|----------------------------|-------------------------------------------|
| 8 | Reducing worries mindfully | Loving Kindness meditation | Notice acts of kindness                   |
| 9 | Maintaining mindfulness    | Silence with bells         | Notice when distracted from being present |

276

277 Each module's theme will be explained through a short 5-10 minute video. At the end of each  
 278 week, participants will receive an email with a link to the video introducing the theme for the  
 279 upcoming week. The script for the videos will be available for downloading and saving or  
 280 printing in a pdf format so that participants can keep a copy for later reference. At the end of  
 281 each module, participants will receive an automatically generated email reminding them to  
 282 continue daily meditation practice (formal practice) and given specific everyday mindfulness  
 283 exercises to apply during daily activities (informal practice).

284

285 To enhance adherence and retention to the 9-week program and deepen their mindfulness  
 286 experience, participants will have access to additional program features. The features are  
 287 guided by a framework proposed by Abraham and Michie [24] to facilitate behaviour change  
 288 in interventions:

289 1) Twice daily reminders to complete mindfulness practice. Adapted from the pilot study,  
 290 emails containing a link to a short, guided meditation audio file will be sent to  
 291 participants twice daily. These emails will serve as reminders to meditate and will  
 292 provide easy access to the meditation practice of the week.

293 2) Progress tracking. Participants will be able to monitor their own mindfulness practice  
 294 each day by reviewing how many times they have used each section of the program,  
 295 and the duration of use. Embedded usage data tracking systems records each login and  
 296 provides real time representation of program use.



1  
2  
3 297 3) Goal setting. When enrolled in the program, participants will have the opportunity to  
4  
5  
6 298 set goals for their mindfulness practice (Figure 2). Goals are linked to usage data  
7  
8 299 tracking to provide participants with feedback about whether they are reaching their  
9  
10 300 goals. Goals may be practice orientated e.g. to practise mindfulness for five minutes  
11  
12 301 each day, or may be specific to each person's situation e.g. I would like to manage my  
13  
14 302 worries leading up to my oncologist appointment.

15  
16  
17 303 4) Reflective journaling. Participants will have the opportunity to journal their experiences  
18  
19 304 during the mindfulness program by using the "My Journal" functionality (Figure 3).  
20  
21 305 Each week's content will have a journal section, which will include prompts related to  
22  
23 306 mindfulness program content, participants will be able to enter and save their responses  
24  
25 307 within the program for future review. Prompts will be developed specifically for the  
26  
27 308 study.

28  
29  
30  
31 309 The mindfulness program can be accessed at any time via direct login to the website or via the  
32  
33 310 hyperlink sent to participants in the daily e-mails.

34  
35  
36 311

37  
38 312 Figure 2. My Goal functionality in MindOnLine

39  
40  
41 313 (Insert Figure 2 here)

42  
43 314

44  
45 315

46  
47 316 Figure 3. My Journal guided self-reflection practise in MindOnLine

48  
49 317 (Insert Figure 3 here)

50  
51 318

## 52 53 54 319 **Data collection**

55  
56 320 Table 2 illustrates the overall schedule for trial participants in both groups. All assessments  
57  
58 321 will be performed online. The questionnaires at baseline, at nine weeks including the

322 satisfaction survey for those in the intervention group and at nine months, will be sent via  
 323 Qualtrics through an automatically generated schedule. Participants who do not complete  
 324 questionnaires will be followed up by telephone at each data collection point. At baseline,  
 325 participants' demographic information (i.e., gender, age, marital status, current employment  
 326 status, highest level of education, postcode, type of cancer, date of diagnosis, time since end of  
 327 last treatment, type of treatment and previous meditation experience) will be collected.

329 Table 2. Schedule of enrolment, interventions, and assessments  
 330

| TIMEPOINT                         | STUDY PERIOD |            |                 |        |        |        |        |        |        |        |        |                   |
|-----------------------------------|--------------|------------|-----------------|--------|--------|--------|--------|--------|--------|--------|--------|-------------------|
|                                   | Enrolment    | Allocation | Post-allocation |        |        |        |        |        |        |        |        | Post-Intervention |
|                                   |              |            | Week 1          | Week 2 | Week 3 | Week 4 | Week 5 | Week 6 | Week 7 | Week 8 | Week 9 | 9-months          |
| <b>ENROLMENT:</b>                 |              |            |                 |        |        |        |        |        |        |        |        |                   |
| Eligibility screen                | X            |            |                 |        |        |        |        |        |        |        |        |                   |
| Informed consent                  | X            |            |                 |        |        |        |        |        |        |        |        |                   |
| Allocation                        |              | X          |                 |        |        |        |        |        |        |        |        |                   |
| <b>INTERVENTIONS:</b>             |              |            |                 |        |        |        |        |        |        |        |        |                   |
| Immediate access to MindOnLine    |              |            | ←—————→         |        |        |        |        |        |        |        |        |                   |
| Waitlist group                    |              |            |                 |        |        |        |        |        |        |        |        |                   |
| <b>ASSESSMENTS (Both groups):</b> |              |            |                 |        |        |        |        |        |        |        |        |                   |
| Demographic characteristics       | X            |            |                 |        |        |        |        |        |        |        |        |                   |
| FCRI [18]                         | X            |            |                 |        |        |        |        |        |        | X      | X      |                   |
| GAD-7 [20]                        | X            |            |                 |        |        |        |        |        |        | X      | X      |                   |
| PHQ-9 [19]                        | X            |            |                 |        |        |        |        |        |        | X      | X      |                   |
| CAMS-R [22]                       | X            |            |                 |        |        |        |        |        |        | X      | X      |                   |
| AQoL-AD [21]                      | X            |            |                 |        |        |        |        |        |        | X      | X      |                   |
| Mindfulness experience            | X            |            |                 |        |        |        |        |        |        | X      | X      |                   |
| Resource use                      | X            |            |                 |        |        |        |        |        |        | X      | X      |                   |

|                                               |   |  |   |   |   |   |   |   |   |   |   |   |
|-----------------------------------------------|---|--|---|---|---|---|---|---|---|---|---|---|
| <i>COVID-19 measures</i>                      | X |  |   |   |   |   |   |   |   |   | X | X |
| <b>ASSESSMENTS (Intervention group only):</b> |   |  |   |   |   |   |   |   |   |   |   |   |
| <i>Adherence tracking and meditation log</i>  |   |  | X | X | X | X | X | X | X | X | X | X |
| <i>Program satisfaction</i>                   |   |  |   |   |   |   |   |   |   |   | X | X |

331

332 **Outcome measures**

333 Fear of cancer recurrence Inventory (FCRI)

334 The 42-item Fear of Cancer Recurrence Inventory (FCRI) is a multidimensional FCR scale

335 intended for use with all cancer patients. Items were developed on the basis of a cognitive–

336 behavioural formulation of FCR (range:0-168).[18] The FCRI consists of seven domains:

337 triggers, severity, psychological distress, functional impairment, reassurance, insight and

338 coping strategies (scoring range:0-36). It has shown high internal consistency, good construct

339 and criterion validity in adults with different cancer types.[18]

340

341 Anxiety and Depression

342 The *Generalized Anxiety Disorder-7 scale (GAD-7)* [20] is a valid and efficient tool for

343 assessing generalised anxiety symptoms and assessing severity in clinical practice and

344 research. The seven items assess the frequency of core symptoms of generalised anxiety

345 disorder within the past 2 weeks (scoring range:0-21).[20]

346 The *Patient Health Questionnaire-9 (PHQ-9)* [19] parallels the nine diagnostic symptom

347 criteria that define DSM-IV major depressive disorder. At only 9 items (scoring range:0-27),

348 the PHQ-9 is shorter than most depression tools. Unlike most other measures of depression,

349 the PHQ-9 was developed, tested and refined for use with medical patients.[19]

350 The PHQ-9 and GAD-7 are recommended for use among cancer survivors in the American

351 Society of Clinical Oncology Guidelines.[25]

352

1  
2  
3 353 Mindfulness

4  
5 354 Trait mindfulness is measured using the Cognitive and Affective Mindfulness Scale-Revised  
6  
7 355 (CAMS-R),[22] a 10-item self-report questionnaire. This scale uses everyday language  
8  
9 356 appropriate for those with little meditation experience and is designed to capture mindfulness  
10  
11 357 as a general daily experience. The questionnaire comprises four domains of mindfulness  
12  
13 358 (attention, present-focus, awareness, and acceptance/non-judgment). Participants are asked to  
14  
15 359 rate on a four-point Likert scale how much they relate to each statement (scoring range:4-40).  
16  
17  
18 360 Compared to other measures of mindfulness, the CAMS-R is unique in that it is related to  
19  
20 361 psychological distress,[26] which is highly relevant to the current study population.[27]  
21  
22

23 362

24  
25 363 Mindfulness experience

26  
27 364 In order to control for access to external mindfulness-based programs particularly in the waitlist  
28  
29 365 group, all participants will be asked whether they have enrolled in a mindfulness-based  
30  
31 366 program in the period between surveys and/or used other supportive care services (e.g. peer  
32  
33 367 support, psychologists, psychotherapy, counsellors, yoga and meditation).  
34  
35  
36

37 368

38  
39 369 Program satisfaction

40  
41 370 Participants in the intervention group will be asked to provide feedback about the *MindOnLine*  
42  
43 371 program. Quantitative and qualitative data using open ended questions will be collected in  
44  
45 372 relation to satisfaction with program content, the helpfulness of the program, usability, and  
46  
47 373 areas for improvement. The satisfaction questionnaire has been adapted from the satisfaction  
48  
49 374 questionnaire used in the pilot study.[6]  
50  
51

52 375

53  
54 376 Economic outcomes

55  
56 377 *Assessment of Quality of Life (AQoL 4D)* [21] is a health-related quality of life utility measure.  
57  
58 378 It is generally used in economic evaluations. The *Resource Use Questionnaire* covers general  
59  
60

1  
2  
3 379 health care services usage (self-reported), use of other welfare services, and impacts on work  
4  
5  
6 380 force participation. The questionnaire has been successfully used in cancer psychosocial  
7  
8 381 intervention studies.[28]  
9

10 382

11  
12 383 Adherence tracking and meditation log

13 384 The software package used to run *MindOnLine* was developed at Deakin University and has  
14  
15  
16 385 inbuilt functionality to collect and clean usage data. Google Analytics has been incorporated  
17  
18  
19 386 into the platform to allow for validation of findings. Both software will track participants'  
20  
21 387 online activity, including login date/times, navigation patterns, page views and duration, and  
22  
23 388 features used (video, audio, goals and reflective journaling).  
24  
25

26 389

27  
28 390 Impact of COVID-19

29 391 To control for potential environmental impacts on mental wellbeing outcomes, participants will  
30  
31  
32 392 be asked whether COVID-19 has had an impact on their mental wellbeing in the two weeks  
33  
34 393 prior to baseline, 9-weeks and 9-month assessments.  
35

36 394

37  
38  
39 395 **Sample size calculations**

40 396 Power calculations are conservative, i.e. the detectable differences reported below are possibly  
41  
42  
43 397 larger than the true detectable differences, because they are based on two-group comparison of  
44  
45 398 change while the main analysis (see Analysis Plan) will adjust for baseline values of the  
46  
47 399 outcome and for factors used in the stratified randomisation.[29] The statistical software PASS  
48  
49 400 version 14.0.9 (NCSS, LLC) was used for all calculations ( $\alpha=0.05$ ; two-sided tests).  
50

51 401

52  
53  
54 402 Primary outcome

55 403 Change in FCRI total score between baseline and 9 weeks. The target sample size (200  
56  
57  
58 404 participants per arm) achieves 94% (80%) power to detect a mean difference between arms of  
59  
60

1  
2  
3 405 10 points (8 points) change in FCRI score or 80% power to detect a difference of 8 points  
4  
5 406 [standard deviation (SD): 23.5;[30)]. SD estimate obtained from Butow et al., [30] as their  
6  
7 407 study included a heterogenous sample of cancer patients while our pilot study only included  
8  
9 408 patients with melanoma Stage 2-3. The selected effect sizes correspond to Cohen's *d* of 0.43  
10  
11 409 (moderate/large) and 0.34 (small/moderate) respectively. Currently, there is no definition of a  
12  
13 410 clinically significant improvement for FCRI score, however, the proposed effect size is  
14  
15 411 comparable to that described in other studies.[30]  
16  
17  
18  
19  
20  
21

#### 22 413 Secondary outcomes

23 414 The target sample size (200 participants per arm) achieves 80% power to detect an intervention  
24  
25 415 effect of size 0.34 (Cohen's *f*, small/moderate) at 9 weeks for any of the outcomes. This effect  
26  
27 416 size corresponds to mean differences between groups of: a) 1.5 point in PHQ-9 depression  
28  
29 417 score (SD = 4.5, maximum SD reported in patients with breast, colorectal and prostate  
30  
31 418 cancer;[31] PHQ-9 minimal clinically important difference (MCID) for cancer patients: 2.6 to  
32  
33 419 5);[32] b) 1.4 point in GAD-7 anxiety score (SD=4.1, maximum SD reported in patients with  
34  
35 420 breast, colorectal and prostate cancer;[33] MCID=1.95);[32] and mean differences between  
36  
37 421 group in change from baseline to 9 weeks of: c) 1.2 points in FCRI severity score (SD=3.6,  
38  
39 422 pilot study effect: 2.6);[6] d) 1.1 points in CAMS-R score (SD=3.4); e) 2.5 points in Worry  
40  
41 423 score [SD=7.3]; f) 3.0 points in PSS score [SD=8.9]; the last 3 reflecting moderate Cohen's *d*  
42  
43 424 effect sizes (<0.35).  
44  
45  
46  
47  
48  
49

50  
51 426 To meet the sample size needs of our desired statistical power, we will recruit 400 participants.

52  
53 427 In our pilot study, six participants (13%) withdrew in the intervention group and none in the  
54  
55 428 control group. Assuming a conservative 30% attrition rate at nine months, we expect to have  
56  
57 429 complete data for approximately 280 participants (140 per group).  
58  
59  
60

430

431 **Analysis plan**

432 All statistical analysis will be conducted on an intention-to-treat basis whereby all randomised  
433 participants with at least one post-baseline measurement will be analysed by original treatment  
434 assignment regardless of adherence. Baseline characteristics will be described using summary  
435 measures selected based on variable distribution. The main analysis will adjust for baseline  
436 values of the outcome and for factors used in the stratified randomisation.[29]

437

438 *Aims 1 and 2.* The effect of the intervention on each of the outcomes, defined as change from  
439 baseline to nine weeks, will be assessed using linear models including group and the  
440 stratification factors. *Aim 3.* The effect of the intervention across the three measurement times  
441 will be estimated using linear mixed models, including study group, time (categorical: 9 weeks,  
442 9 months) interaction group×time and the stratification factors as fixed effects and participant  
443 as a random effect. If there is a positive intervention effect on mental health outcomes,  
444 exploratory mediation analyses will be conducted to determine whether improvements are  
445 mediated by increases in mindfulness.[34] For outcomes where it is a plausible assumption that  
446 missing data are completely at random, we will use complete case analysis; if not plausible, we  
447 will use multiple imputation. *Subgroup analysis:* We will explore whether age or gender  
448 modify the effect of the intervention on FCR, depression and anxiety at 9 weeks.

449

450 *Aim 4.* This study will also comprise a cost-consequences analysis where incremental costs of  
451 the intervention will be compared with the full spectrum of outcomes included in the study. A  
452 series of cost-effectiveness ratios can be determined which have been shown to be useful for  
453 decision-makers. Inclusion of the AQoL 4D will also enable a cost-utility analysis to be  
454 undertaken, thereby allowing practical judgements to be made regarding value for money

1  
2  
3 455 credentials of the intervention. Nevertheless, the economic analysis will be primarily from the  
4  
5  
6 456 perspective of the health care sector and a secondary analysis from the broader societal  
7  
8 457 perspective will also be undertaken. A detailed costing of the intervention will be undertaken  
9  
10 458 and the evaluation will first measure and value any change to the use of health care resources  
11  
12 459 over the period of the study between the two arms of the trial and then compare any additional  
13  
14 460 costs to the additional outcomes achieved. Standardised economic evaluation techniques will  
15  
16 461 be used including incremental analysis of mean differences and bootstrapping to determine  
17  
18 462 confidence intervals along with a net monetary analysis to determine the cost-effectiveness of  
19  
20 463 the intervention for different value for money threshold criteria. The costs of routine roll-out  
21  
22 464 will be estimated.  
23  
24  
25

26 465

28 466 *MindOnLine* usage data by the intervention group will be reported using descriptive statistics.

30 467 Linear mixed models, with random intercept and slope for each person, will be fitted to estimate  
31  
32  
33 468 time trends in usage.  
34

#### 35 469 **Data management**

37 470 Data will be exported from Qualtrics on a monthly basis and crossed checked during  
38  
39 471 exportation to ensure accuracy in results. All identifying participant information will be  
40  
41 472 removed from data sets. Documents containing sensitive information will be saved as password  
42  
43 473 protected files and stored within the Deakin University One Drive.  
44  
45

#### 46 474 **Monitoring**

##### 48 475 Data

50 476 The adherence data will be monitored by the program developer. The program developer does  
51  
52 477 not have any competing interests. Other project data will be monitored by the project steering  
53  
54 478 committee with regular meetings and progress updates. No interim analysis will be performed  
55  
56 479 during the trial.  
57  
58

#### 59 480 **Patient and Public Involvement**



1  
2  
3 481 Representatives from three consumer organisations have been involved in the design and  
4  
5 482 implementation of the project since its inception. Their contribution has included development  
6  
7 483 of the intervention and its content, wording on recruitment material, and provided advice on  
8  
9 484 recruitment strategies. Representatives from each consumer organisation has contributed to  
10  
11 485 project steering meetings.  
12  
13  
14  
15

## 16 486 **Ethics and Dissemination**

### 17 487 **Harms**

18 488 In the event that a participant reports distress to the project manager they will be advised to  
19  
20 489 seek assistance from the regular medical professionals and provided with additional referrals  
21  
22 490 to lifeline.org.au. Ethics approval was obtained from the Peter MacCallum Cancer Centre  
23  
24 491 (20-53) and Deakin University (2020-284). Any adverse events will be reported to the ethics  
25  
26 492 committees.  
27  
28  
29  
30

### 31 493 **Auditing**

32 494 The trial may be audited by the governing Human Research Ethics Committees.  
33  
34  
35

### 36 495 **Protocol amendments**

37 496 Protocol amendments will be approved by the governing Human Research Ethics Committees.  
38  
39 497 Any relevant changes will be submitted as a modification to the Australian and New Zealand  
40  
41 498 Clinical Trial Registry.  
42  
43

### 44 499 **Dissemination**

45 500 The findings of this study will be written by study authors and published in peer reviewed  
46  
47 501 journals project steering committee. Access to full datasets will be made available upon  
48  
49 502 reasonable request. All identifying participant information will be removed prior to publication.  
50  
51  
52  
53

## 54 503 **Discussion**

55 504 One of the most significant changes across society is the use of web-based technology. Online  
56  
57 505 mindfulness-based interventions circumvent problems with traditional face-to-face delivery of  
58  
59  
60

1  
2  
3 506 the program, impacted by work commitments, caring responsibilities and geographic  
4  
5 507 isolation.[2]  
6  
7

8 508

9  
10 509 This study will rigorously evaluate the efficacy of a self-directed online mindfulness program  
11  
12 510 in reducing FCR in breast, prostate and CRC survivors. The study will advance the literature  
13  
14 511 regarding the benefits of mindfulness for cancer survivors by representing one of few large  
15  
16 512 well controlled trials of a self-directed mindfulness-based program aimed at reducing FCR.  
17  
18 513 Including a health economic evaluation of the program adds to the utility of the trial with the  
19  
20 514 study providing information that budget holders and policy makers need when considering  
21  
22 515 recommendations and support for supportive care programs. This trial will fill a gap in  
23  
24 516 knowledge regarding the potential impact of mindfulness in supporting cancer survivors.[7]  
25  
26 517 Extensive pilot work in identifying the type of program cancer survivors are interested in,  
27  
28 518 involving consumers in designing the content and length of the program and providing  
29  
30 519 reminders and practice tips increase the likelihood of participants engaging with the program  
31  
32 520 and the intervention having a positive impact.  
33  
34  
35  
36

37 521

38  
39  
40 522 The study is being conducted in partnership with health services and cancer advocacy and  
41  
42 523 community groups who have assisted in the design of the research trial and intervention. As  
43  
44 524 partners in the study, they will ensure the intervention can be rolled out to cancer survivors if  
45  
46 525 shown to be effective. In addition to consumer advocacy groups, the study is being conducted  
47  
48 526 in partnership with government. As we expect the *MindOnLine* intervention to improve health  
49  
50 527 outcomes, reduce the fear and distress in cancer survivorship and reduce health service and  
51  
52 528 community costs our partnership with government will ensure that policy makers are informed  
53  
54 529 of the study's findings particularly cost-effectiveness findings.  
55  
56  
57

58 530  
59  
60

1  
2  
3 531 The study has a number of strengths and weaknesses. Development of the intervention through  
4  
5 532 a review of the literature, input from consumers and findings from a pilot study and  
6  
7  
8 533 involvement of consumer advocacy groups and government are study strengths ensuring  
9  
10 534 translation of the program into practice if shown to be effective. Involvement of the consumer  
11  
12 535 advocacy groups also aid in recruitment. Incorporating an economic evaluation into the study  
13  
14 536 design is a strength as it will complement clinical findings and support decision-making  
15  
16  
17 537 processes for potential implementation. However, several limitations also need to be  
18  
19 538 acknowledged. Recruitment through social media platforms means we cannot accurately assess  
20  
21 539 uptake of the intervention, as we will not be able to identify the number of eligible people  
22  
23 540 exposed to our recruitment flyers. This may limit our ability to determine reach of the program.  
24  
25  
26 541 However, recording the time taken for recruitment and accessing google analytic data on  
27  
28 542 internet traffic and page visits may provide some information in this area. Participants will need  
29  
30 543 access to the internet to participate. While this may mean some people will be excluded from  
31  
32 544 the study, we believe this will have minimal impact on the study. We envisage that the study  
33  
34 545 will take approximately 4 years to complete. Advances in social platforms, technology and  
35  
36 546 app-based programing can change substantially in a short period. While this may affect the  
37  
38 547 actual online platform used for the program, we do not consider this will influence the program  
39  
40 548 content or delivery mechanisms. As technology advances will likely increase interest in self-  
41  
42 549 directed support programs for cancer survivors, it is essential that cancer survivors access  
43  
44 550 programs with demonstrated effectiveness.  
45  
46  
47  
48

#### 49 **Trial Status**

51 **Protocol Version:** Version 5, dated 18 December 2020

53 Recruitment commenced 12.10.2020, it is anticipated recruitment will be for a duration of 18  
54  
55 554 months finishing on 12.04.2022.

58 555  
59  
60

1  
2  
3 556 **Abbreviations**  
4

5 557 AQL-4D Assessment of Quality of Life – 4 Dimensions  
6

7 558 BCNA Breast Cancer Network Australia  
8

9 559 CAMSR Cognitive and Affective Mindfulness Scale-Revised  
10

11 560 CI Confidence interval  
12

13 561 CRC Colorectal Cancer  
14

15 562 FCR Fear of cancer recurrence  
16

17 563 FCRI Fear of Cancer Recurrence Inventory  
18

19 564 GAD-7 General Anxiety Disorder scale  
20

21 565 MBCT Mindfulness-based cognitive therapy  
22

23 566 MCID Minimally clinically important difference  
24

25 567 PCFA Prostate Cancer Foundation of Australia  
26

27 568 PHQ-9 Patient Health Questionnaire  
28

29 569 QALY Quality of Life Years  
30

31 570 QoL Quality of Life  
32

33 571 RA Research assistant  
34

35 572 RCT Randomized controlled trial  
36

37 573 SD standard deviation  
38  
39  
40  
41  
42  
43  
44  
45  
46  
47  
48  
49  
50  
51  
52  
53  
54  
55  
56  
57  
58  
59  
60

574 **References**

- 575 1. Australian Institute of Health and Welbeing. Cancer in Australia 2017. Canberra:  
576 AIHW, 2017.
- 577 2. Carlson LE. Mindfulness-based interventions for coping with cancer. *Annals of the*  
578 *New York Academy of Sciences* 2016;1373(1):5-12. doi: 10.1111/nyas.13029
- 579 3. Simard S, Thewes B, Humphris G, et al. Fear of cancer recurrence in adult cancer  
580 survivors: a systematic review of quantitative studies. *J Cancer Surviv* 2013;7(3):300-  
581 22. doi: 10.1007/s11764-013-0272-z [published Online First: 2013/03/12]
- 582 4. Mitchell A. Pooled Results From 38 Analyses of the Accuracy of Distress  
583 Thermometer and Other Ultra-Short Methods of Detecting Cancer-Related Mood  
584 Disorders. *Journal of Clinical Oncology* 2007;25(29):4670-81. doi:  
585 10.1200/jco.2006.10.0438
- 586 5. Savard J, Ivers H. The evolution of fear of cancer recurrence during the cancer care  
587 trajectory and its relationship with cancer characteristics. *Journal of Psychosomatic*  
588 *Research* 2013;74(4):354-60. doi: <https://doi.org/10.1016/j.jpsychores.2012.12.013>
- 589 6. Russell L, Ugalde A, Orellana L, et al. A pilot randomised controlled trial of an online  
590 mindfulness-based program for people diagnosed with melanoma. *Supportive Care in*  
591 *Cancer* 2019;27(7):2735-46. doi: 10.1007/s00520-018-4574-6
- 592 7. Keng S-L, Smoski MJ, Robins CJ. Effects of mindfulness on psychological health: A  
593 review of empirical studies. *Clinical Psychology Review* 2011;31(6):1041-56. doi:  
594 <https://doi.org/10.1016/j.cpr.2011.04.006>
- 595 8. Piet J, Wurtzen H, Zachariae R. The effect of mindfulness-based therapy on  
596 symptoms of anxiety and depression in adult cancer patients and survivors: a  
597 systematic review and meta-analysis. *J Consult Clin Psychol* 2012;80(6):1007-20.  
598 doi: 10.1037/a0028329 [published Online First: 2012/05/09]
- 599 9. Chambers SK, Occhipinti S, Foley E, et al. Mindfulness-Based Cognitive Therapy in  
600 Advanced Prostate Cancer: A Randomized Controlled Trial. *Journal of Clinical*  
601 *Oncology* 2017;35(3):291-97. doi: 10.1200/jco.2016.68.8788
- 602 10. Crane RS, Brewer J, Feldman C, et al. What defines mindfulness-based programs?  
603 The warp and the weft. *Psychological Medicine* 2017;47(6):990-99. doi:  
604 10.1017/S0033291716003317 [published Online First: 2016/12/29]
- 605 11. van Emmerik AAP, Berings F, Lancee J. Efficacy of a Mindfulness-Based Mobile  
606 Application: a Randomized Waiting-List Controlled Trial. *Mindfulness*  
607 2018;9(1):187-98. doi: 10.1007/s12671-017-0761-7
- 608 12. Compen F, Bisseling E, Schellekens M, et al. Face-to-Face and Internet-Based  
609 Mindfulness-Based Cognitive Therapy Compared With Treatment as Usual in  
610 Reducing Psychological Distress in Patients With Cancer: A Multicenter Randomized  
611 Controlled Trial. *Journal of Clinical Oncology* 2018;36(23):2413-21. doi:  
612 10.1200/JCO.2017.76.5669

- 1  
2  
3 613 13. Zernicke KA, Campbell TS, Specia M, et al. The eCALM Trial: eTherapy for Cancer  
4 614 Applying Mindfulness. Exploratory Analyses of the Associations Between Online  
5 615 Mindfulness-Based Cancer Recovery Participation and Changes in Mood, Stress  
6 616 Symptoms, Mindfulness, Posttraumatic Growth, and Spirituality. *Mindfulness*,  
7 617 2016:1071-81.  
8  
9  
10 618 14. Bruggeman-Everts FZ, Wolvers MDJ, van de Schoot R, et al. Effectiveness of Two  
11 619 Web-Based Interventions for Chronic Cancer-Related Fatigue Compared to an Active  
12 620 Control Condition: Results of the “Fitter na kanker” Randomized Controlled Trial. *J*  
13 621 *Med Internet Res* 2017;19(10):e336. doi: 10.2196/jmir.7180  
14  
15 622 15. Russell L, Ugalde A, Milne D, et al. Digital Characteristics and Dissemination  
16 623 Indicators to Optimize Delivery of Internet-Supported Mindfulness-Based  
17 624 Interventions for People With a Chronic Condition: Systematic Review. *JMIR Ment*  
18 625 *Health* 2018;5(3):e53. doi: 10.2196/mental.9645 [published Online First: 2018/08/23]  
19  
20 626 16. Russell L, Orellana L, Ugalde A, et al. Exploring Knowledge, Attitudes, and Practice  
21 627 Associated With Meditation Among Patients With Melanoma. *Integr Cancer Ther*  
22 628 2018;17(2):237-47. doi: 10.1177/1534735417699514 [published Online First:  
23 629 2017/06/20]  
24  
25 630 17. Smith AB, Thewes B, Turner J, et al. Pilot of a theoretically grounded psychologist-  
26 631 delivered intervention for fear of cancer recurrence (Conquer Fear). *Psycho-Oncology*  
27 632 2015(8):967. doi: 10.1002/pon.3775  
28  
29 633 18. Simard S, Savard J. Screening and comorbidity of clinical levels of fear of cancer  
30 634 recurrence. *Journal of Cancer Survivorship* 2015;9(3):481-91. doi: 10.1007/s11764-  
31 635 015-0424-4  
32  
33 636 19. Kroenke K, Spitzer RL, Williams JBW. The PHQ-9: validity of a brief depression  
34 637 severity measure. *Journal of General Internal Medicine* 2001;16(9):606-13. doi:  
35 638 10.1046/j.1525-1497.2001.016009606.x  
36  
37 639 20. Löwe B, Decker O, Müller S, et al. Validation and Standardization of the Generalized  
38 640 Anxiety Disorder Screener (GAD-7) in the General Population. *Medical Care*  
39 641 2008;46(3):266-74. doi: 10.1097/MLR.0b013e318160d093  
40  
41 642 21. Richardson J, Iezzi A, Khan MA, et al. Validity and Reliability of the Assessment of  
42 643 Quality of Life (AQoL)-8D Multi-Attribute Utility Instrument. *The Patient - Patient-*  
43 644 *Centered Outcomes Research* 2014;7(1):85-96. doi: 10.1007/s40271-013-0036-x  
44  
45 645 22. Feldman G, Hayes A, Kumar S, et al. The Development and Initial Validation of the  
46 646 Cognitive and Affective Mindfulness Scale-Revised (CAMS-R). *Journal of*  
47 647 *Psychopathology and Behavioral Assessment* 2006;29(3):177. doi: 10.1007/s10862-  
48 648 006-9035-8  
49  
50 649 23. Whitaker C, Stevelink S, Fear N. The Use of Facebook in Recruiting Participants for  
51 650 Health Research Purposes: A Systematic Review. *Journal of medical Internet*  
52 651 *research* 2017;19(8):e290-e90. doi: 10.2196/jmir.7071  
53  
54 652 24. Abraham C, Michie S. A taxonomy of behavior change techniques used in  
55 653 interventions. *Health psychology : official journal of the Division of Health*



- 1  
2  
3 654 *Psychology, American Psychological Association* 2008;27(3):379-87. doi:  
4 655 10.1037/0278-6133.27.3.379 [published Online First: 2008/07/16]  
5  
6 656 25. Andersen BL, DeRubeis RJ, Berman BS, et al. Screening, Assessment, and Care of  
7 657 Anxiety and Depressive Symptoms in Adults With Cancer: An American Society of  
8 658 Clinical Oncology Guideline Adaptation. *Journal of Clinical Oncology*  
9 659 2014;32(15):1605-19. doi: 10.1200/jco.2013.52.4611  
10  
11  
12 660 26. Bergomi C, Tschacher W, Kupper Z. The Assessment of Mindfulness with Self-  
13 661 Report Measures: Existing Scales and Open Issues. *Mindfulness* 2013;4(3):191-202.  
14 662 doi: 10.1007/s12671-012-0110-9  
15  
16 663 27. Kasparian NA, McLoone JK, Butow PN. Psychological Responses and Coping  
17 664 Strategies Among Patients With Malignant Melanoma: A Systematic Review of the  
18 665 Literature. *Archives of Dermatology* 2009;145(12):1415-27. doi:  
19 666 10.1001/archdermatol.2009.308  
20  
21  
22 667 28. Livingston PM, Heckel L, Orellana L, et al. Outcomes of a randomized controlled  
23 668 trial assessing a smartphone Application to reduce unmet needs among people  
24 669 diagnosed with CancEr (ACE). *Cancer Medicine* 2020;9(2):507-16. doi:  
25 670 10.1002/cam4.2718  
26  
27  
28 671 29. Yang L, Tsiatis AA. Efficiency Study of Estimators for a Treatment Effect in a  
29 672 Pretest–Posttest Trial. *The American Statistician* 2001;55(4):314-21. doi:  
30 673 10.1198/000313001753272466  
31  
32 674 30. Butow PN, Turner J, Gilchrist J, et al. Randomized Trial of ConquerFear: A Novel,  
33 675 Theoretically Based Psychosocial Intervention for Fear of Cancer Recurrence.  
34 676 *Journal of Clinical Oncology* 2017;35(36):4066-77. doi: 10.1200/jco.2017.73.1257  
35  
36 677 31. Hartung TJ, Brähler E, Faller H, et al. The risk of being depressed is significantly  
37 678 higher in cancer patients than in the general population: Prevalence and severity of  
38 679 depressive symptoms across major cancer types. *European Journal of Cancer*  
39 680 2017;72:46-53. doi: 10.1016/j.ejca.2016.11.017  
40  
41  
42 681 32. Scott EL, Kroenke K, Wu J, et al. Beneficial Effects of Improvement in Depression,  
43 682 Pain Catastrophizing, and Anxiety on Pain Outcomes: A 12-Month Longitudinal  
44 683 Analysis. *The Journal of Pain* 2016;17(2):215-22. doi: 10.1016/j.jpain.2015.10.011  
45  
46 684 33. Faller H, Brähler E, Härter M, et al. Unmet needs for information and psychosocial  
47 685 support in relation to quality of life and emotional distress: A comparison between  
48 686 gynecological and breast cancer patients. *Patient Education and Counseling*  
49 687 2017;100(10):1934-42. doi: <https://doi.org/10.1016/j.pec.2017.05.031>  
50  
51  
52 688 34. Labelle LE, Campbell TS, Carlson LE. Mindfulness-Based Stress Reduction in  
53 689 Oncology: Evaluating Mindfulness and Rumination as Mediators of Change in  
54 690 Depressive Symptoms. *Mindfulness* 2010;1(1):28-40. doi: 10.1007/s12671-010-0005-  
55 691 6  
56  
57  
58 692  
59  
60

1  
2  
3 **693 Declarations**  
4  
5

6 **694 Author's contributions**  
7

8  
9 695 PML, LR, LO, NH, MJ, AU, RC, DWA, EO, VW, developed the program and study design  
10  
11 696 with input from all authors; EO designed the web platform and analytics with input from LR,  
12  
13 697 NH, RC, BS, PML. CM designed the economic component of the study. All authors provided  
14  
15 698 substantial input into the development of the protocol. PML and NH drafted the manuscript  
16  
17 699 with contributions from the co-authors. Each of the authors contributed to, read and  
18  
19 700 approved, the final manuscript.  
20  
21

22 701 Each of the co-authors is on the steering committee, and will oversee implementation of the  
23  
24 702 study and data collection.  
25  
26

27 **703 Funding**  
28

29 704 This study is funded by the National Health and Medical Research Council (NHMRC)  
30  
31 705 Partnership Grant ID APP1179317. The funder supported the cost of undertaking the project.  
32  
33

34 **706 Competing interests**  
35

36 707 The authors declare they have no competing interests.  
37  
38

39  
40  
41 **709 Figure Legend/Caption:**  
42

43 710 Figure 1. Study flowchart  
44  
45

46 711

47  
48 712 FCRI (Fear of Cancer Recurrence Inventory); GAD-7 (General Anxiety and Distress scale;  
49  
50 713 PHQ-9 (Patient Health Questionnaire); CAMS-R (Cognitive and Affective Mindfulness Scale  
51  
52 714 – Revised); AQoL-4D (Assessment of Quality of Life – 4 Dimensions)  
53  
54

55 715

56  
57 716 Figure 2. My Goal functionality in MindOnline  
58  
59

60 717



1  
2  
3  
4  
5  
6  
7  
8  
9  
10  
11  
12  
13  
14  
15  
16  
17  
18  
19  
20  
21  
22  
23  
24  
25  
26  
27  
28  
29  
30  
31  
32  
33  
34  
35  
36  
37  
38  
39  
40  
41  
42  
43  
44  
45  
46  
47  
48  
49  
50  
51  
52  
53  
54  
55  
56  
57  
58  
59  
60

718 Figure 3. My Journal guided self-reflection practise in MindOnLine.

For peer review only

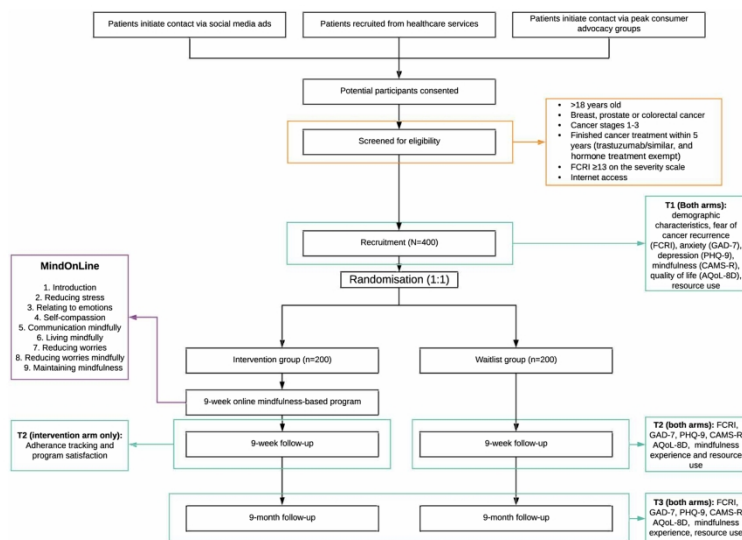

Figure 1. Study flowchart.

338x190mm (300 x 300 DPI)

1  
2  
3  
4  
5  
6  
7  
8  
9  
10  
11  
12  
13  
14  
15  
16  
17  
18  
19  
20  
21  
22  
23  
24  
25  
26  
27  
28  
29  
30  
31  
32  
33  
34  
35  
36  
37  
38  
39  
40  
41  
42  
43  
44  
45  
46  
47  
48  
49  
50  
51  
52  
53  
54  
55  
56  
57  
58  
59  
60

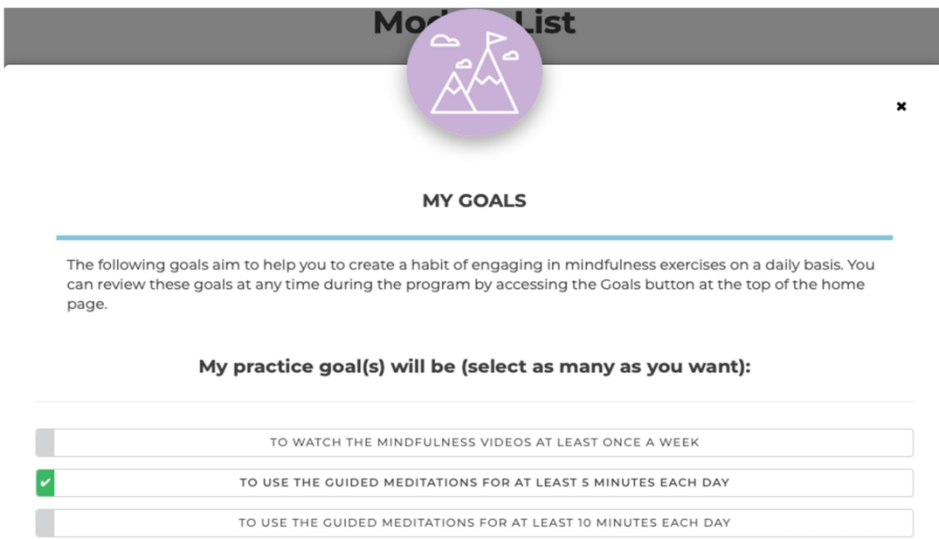

Figure 2. My goal functionality in MondOnline.

218x120mm (300 x 300 DPI)

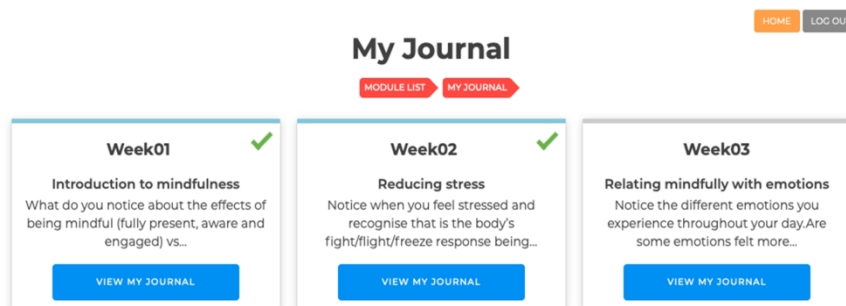

Figure 3. My journal guided self-reflection practice in MindOnline.

308x99mm (300 x 300 DPI)

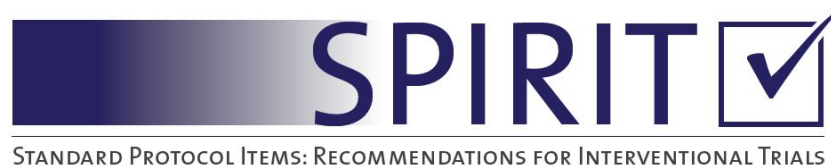

SPIRIT 2013 Checklist: Recommended items to address in a clinical trial protocol and related documents\*

| Section/item                      | Item No | Description                                                                                                                                                                                                                                                                              | Addressed on page number |
|-----------------------------------|---------|------------------------------------------------------------------------------------------------------------------------------------------------------------------------------------------------------------------------------------------------------------------------------------------|--------------------------|
| <b>Administrative information</b> |         |                                                                                                                                                                                                                                                                                          |                          |
| Title                             | 1       | Descriptive title identifying the study design, population, interventions, and, if applicable, trial acronym                                                                                                                                                                             | 1                        |
| Trial registration                | 2a      | Trial identifier and registry name. If not yet registered, name of intended registry                                                                                                                                                                                                     | 2                        |
|                                   | 2b      | All items from the World Health Organization Trial Registration Data Set                                                                                                                                                                                                                 | n/a                      |
| Protocol version                  | 3       | Date and version identifier                                                                                                                                                                                                                                                              | 2                        |
| Funding                           | 4       | Sources and types of financial, material, and other support                                                                                                                                                                                                                              | 23                       |
| Roles and responsibilities        | 5a      | Names, affiliations, and roles of protocol contributors                                                                                                                                                                                                                                  | 1                        |
|                                   | 5b      | Name and contact information for the trial sponsor                                                                                                                                                                                                                                       | 1                        |
|                                   | 5c      | Role of study sponsor and funders, if any, in study design; collection, management, analysis, and interpretation of data; writing of the report; and the decision to submit the report for publication, including whether they will have ultimate authority over any of these activities | 23                       |
|                                   | 5d      | Composition, roles, and responsibilities of the coordinating centre, steering committee, endpoint adjudication committee, data management team, and other individuals or groups overseeing the trial, if applicable (see Item 21a for data monitoring committee)                         | 23                       |

1 **Introduction**

2

3 Background and 6a Description of research question and justification for undertaking the trial, including summary of relevant 3-5  
4 rationale studies (published and unpublished) examining benefits and harms for each intervention  
5

6 6b Explanation for choice of comparators 6  
7

8 Objectives 7 Specific objectives or hypotheses 5-6  
9

10 Trial design 8 Description of trial design including type of trial (eg, parallel group, crossover, factorial, single group), 6  
11 allocation ratio, and framework (eg, superiority, equivalence, noninferiority, exploratory)  
12  
13

14 **Methods: Participants, interventions, and outcomes**

15

16 Study setting 9 Description of study settings (eg, community clinic, academic hospital) and list of countries where data will 6, 8  
17 be collected. Reference to where list of study sites can be obtained  
18

19 Eligibility criteria 10 Inclusion and exclusion criteria for participants. If applicable, eligibility criteria for study centres and 8  
20 individuals who will perform the interventions (eg, surgeons, psychotherapists)  
21

22 Interventions 11a Interventions for each group with sufficient detail to allow replication, including how and when they will be 11-14  
23 administered  
24

25 11b Criteria for discontinuing or modifying allocated interventions for a given trial participant (eg, drug dose n/a  
26 change in response to harms, participant request, or improving/worsening disease)  
27

28 11c Strategies to improve adherence to intervention protocols, and any procedures for monitoring adherence 12-13, 16  
29 (eg, drug tablet return, laboratory tests)  
30

31 11d Relevant concomitant care and interventions that are permitted or prohibited during the trial 16  
32

33 Outcomes 12 Primary, secondary, and other outcomes, including the specific measurement variable (eg, systolic blood  
34 pressure), analysis metric (eg, change from baseline, final value, time to event), method of aggregation (eg, 15-17  
35 median, proportion), and time point for each outcome. Explanation of the clinical relevance of chosen  
36 efficacy and harm outcomes is strongly recommended  
37

38 Participant timeline 13 Time schedule of enrolment, interventions (including any run-ins and washouts), assessments, and visits for 14  
39 participants. A schematic diagram is highly recommended (see Figure)  
40  
41  
42

|   |             |    |                                                                                                                                                                                       |    |
|---|-------------|----|---------------------------------------------------------------------------------------------------------------------------------------------------------------------------------------|----|
| 1 | Sample size | 14 | Estimated number of participants needed to achieve study objectives and how it was determined, including clinical and statistical assumptions supporting any sample size calculations | 19 |
| 2 |             |    |                                                                                                                                                                                       |    |
| 3 |             |    |                                                                                                                                                                                       |    |
| 4 | Recruitment | 15 | Strategies for achieving adequate participant enrolment to reach target sample size                                                                                                   | 9  |
| 5 |             |    |                                                                                                                                                                                       |    |

## 6 **Methods: Assignment of interventions (for controlled trials)**

### 7 Allocation:

|    |                                  |     |                                                                                                                                                                                                                                                                                                                                                          |    |
|----|----------------------------------|-----|----------------------------------------------------------------------------------------------------------------------------------------------------------------------------------------------------------------------------------------------------------------------------------------------------------------------------------------------------------|----|
| 10 | Sequence generation              | 16a | Method of generating the allocation sequence (eg, computer-generated random numbers), and list of any factors for stratification. To reduce predictability of a random sequence, details of any planned restriction (eg, blocking) should be provided in a separate document that is unavailable to those who enrol participants or assign interventions | 10 |
| 11 |                                  |     |                                                                                                                                                                                                                                                                                                                                                          |    |
| 12 |                                  |     |                                                                                                                                                                                                                                                                                                                                                          |    |
| 13 |                                  |     |                                                                                                                                                                                                                                                                                                                                                          |    |
| 14 |                                  |     |                                                                                                                                                                                                                                                                                                                                                          |    |
| 15 |                                  |     |                                                                                                                                                                                                                                                                                                                                                          |    |
| 16 | Allocation concealment mechanism | 16b | Mechanism of implementing the allocation sequence (eg, central telephone; sequentially numbered, opaque, sealed envelopes), describing any steps to conceal the sequence until interventions are assigned                                                                                                                                                | 10 |
| 17 |                                  |     |                                                                                                                                                                                                                                                                                                                                                          |    |
| 18 |                                  |     |                                                                                                                                                                                                                                                                                                                                                          |    |
| 19 |                                  |     |                                                                                                                                                                                                                                                                                                                                                          |    |
| 20 | Implementation                   | 16c | Who will generate the allocation sequence, who will enrol participants, and who will assign participants to interventions                                                                                                                                                                                                                                | 10 |
| 21 |                                  |     |                                                                                                                                                                                                                                                                                                                                                          |    |
| 22 |                                  |     |                                                                                                                                                                                                                                                                                                                                                          |    |
| 23 |                                  |     |                                                                                                                                                                                                                                                                                                                                                          |    |
| 24 | Blinding (masking)               | 17a | Who will be blinded after assignment to interventions (eg, trial participants, care providers, outcome assessors, data analysts), and how                                                                                                                                                                                                                | 10 |
| 25 |                                  |     |                                                                                                                                                                                                                                                                                                                                                          |    |
| 26 |                                  |     |                                                                                                                                                                                                                                                                                                                                                          |    |
| 27 |                                  | 17b | If blinded, circumstances under which unblinding is permissible, and procedure for revealing a participant's allocated intervention during the trial                                                                                                                                                                                                     | 10 |
| 28 |                                  |     |                                                                                                                                                                                                                                                                                                                                                          |    |
| 29 |                                  |     |                                                                                                                                                                                                                                                                                                                                                          |    |
| 30 |                                  |     |                                                                                                                                                                                                                                                                                                                                                          |    |

## 31 **Methods: Data collection, management, and analysis**

|    |                         |     |                                                                                                                                                                                                                                                                                                                                                                                                              |    |
|----|-------------------------|-----|--------------------------------------------------------------------------------------------------------------------------------------------------------------------------------------------------------------------------------------------------------------------------------------------------------------------------------------------------------------------------------------------------------------|----|
| 33 | Data collection methods | 18a | Plans for assessment and collection of outcome, baseline, and other trial data, including any related processes to promote data quality (eg, duplicate measurements, training of assessors) and a description of study instruments (eg, questionnaires, laboratory tests) along with their reliability and validity, if known. Reference to where data collection forms can be found, if not in the protocol | 14 |
| 34 |                         |     |                                                                                                                                                                                                                                                                                                                                                                                                              |    |
| 35 |                         |     |                                                                                                                                                                                                                                                                                                                                                                                                              |    |
| 36 |                         |     |                                                                                                                                                                                                                                                                                                                                                                                                              |    |
| 37 |                         |     |                                                                                                                                                                                                                                                                                                                                                                                                              |    |
| 38 |                         |     |                                                                                                                                                                                                                                                                                                                                                                                                              |    |
| 39 |                         | 18b | Plans to promote participant retention and complete follow-up, including list of any outcome data to be collected for participants who discontinue or deviate from intervention protocols                                                                                                                                                                                                                    | 14 |
| 40 |                         |     |                                                                                                                                                                                                                                                                                                                                                                                                              |    |
| 41 |                         |     |                                                                                                                                                                                                                                                                                                                                                                                                              |    |
| 42 |                         |     |                                                                                                                                                                                                                                                                                                                                                                                                              |    |

|    |                                 |     |                                                                                                                                                                                                                                                                                                                                       |    |
|----|---------------------------------|-----|---------------------------------------------------------------------------------------------------------------------------------------------------------------------------------------------------------------------------------------------------------------------------------------------------------------------------------------|----|
| 1  | Data management                 | 19  | Plans for data entry, coding, security, and storage, including any related processes to promote data quality (eg, double data entry; range checks for data values). Reference to where details of data management procedures can be found, if not in the protocol                                                                     | 21 |
| 2  |                                 |     |                                                                                                                                                                                                                                                                                                                                       |    |
| 3  |                                 |     |                                                                                                                                                                                                                                                                                                                                       |    |
| 4  |                                 |     |                                                                                                                                                                                                                                                                                                                                       |    |
| 5  | Statistical methods             | 20a | Statistical methods for analysing primary and secondary outcomes. Reference to where other details of the statistical analysis plan can be found, if not in the protocol                                                                                                                                                              | 19 |
| 6  |                                 |     |                                                                                                                                                                                                                                                                                                                                       |    |
| 7  |                                 |     |                                                                                                                                                                                                                                                                                                                                       |    |
| 8  |                                 | 20b | Methods for any additional analyses (eg, subgroup and adjusted analyses)                                                                                                                                                                                                                                                              | 19 |
| 9  |                                 |     |                                                                                                                                                                                                                                                                                                                                       |    |
| 10 |                                 | 20c | Definition of analysis population relating to protocol non-adherence (eg, as randomised analysis), and any statistical methods to handle missing data (eg, multiple imputation)                                                                                                                                                       | 19 |
| 11 |                                 |     |                                                                                                                                                                                                                                                                                                                                       |    |
| 12 |                                 |     |                                                                                                                                                                                                                                                                                                                                       |    |
| 13 |                                 |     |                                                                                                                                                                                                                                                                                                                                       |    |
| 14 | <b>Methods: Monitoring</b>      |     |                                                                                                                                                                                                                                                                                                                                       |    |
| 15 |                                 |     |                                                                                                                                                                                                                                                                                                                                       |    |
| 16 | Data monitoring                 | 21a | Composition of data monitoring committee (DMC); summary of its role and reporting structure; statement of whether it is independent from the sponsor and competing interests; and reference to where further details about its charter can be found, if not in the protocol. Alternatively, an explanation of why a DMC is not needed | 21 |
| 17 |                                 |     |                                                                                                                                                                                                                                                                                                                                       |    |
| 18 |                                 |     |                                                                                                                                                                                                                                                                                                                                       |    |
| 19 |                                 |     |                                                                                                                                                                                                                                                                                                                                       |    |
| 20 |                                 |     |                                                                                                                                                                                                                                                                                                                                       |    |
| 21 |                                 |     |                                                                                                                                                                                                                                                                                                                                       |    |
| 22 |                                 | 21b | Description of any interim analyses and stopping guidelines, including who will have access to these interim results and make the final decision to terminate the trial                                                                                                                                                               | 21 |
| 23 |                                 |     |                                                                                                                                                                                                                                                                                                                                       |    |
| 24 |                                 |     |                                                                                                                                                                                                                                                                                                                                       |    |
| 25 | Harms                           | 22  | Plans for collecting, assessing, reporting, and managing solicited and spontaneously reported adverse events and other unintended effects of trial interventions or trial conduct                                                                                                                                                     | 21 |
| 26 |                                 |     |                                                                                                                                                                                                                                                                                                                                       |    |
| 27 |                                 |     |                                                                                                                                                                                                                                                                                                                                       |    |
| 28 |                                 |     |                                                                                                                                                                                                                                                                                                                                       |    |
| 29 | Auditing                        | 23  | Frequency and procedures for auditing trial conduct, if any, and whether the process will be independent from investigators and the sponsor                                                                                                                                                                                           | 21 |
| 30 |                                 |     |                                                                                                                                                                                                                                                                                                                                       |    |
| 31 |                                 |     |                                                                                                                                                                                                                                                                                                                                       |    |
| 32 |                                 |     |                                                                                                                                                                                                                                                                                                                                       |    |
| 33 | <b>Ethics and dissemination</b> |     |                                                                                                                                                                                                                                                                                                                                       |    |
| 34 |                                 |     |                                                                                                                                                                                                                                                                                                                                       |    |
| 35 | Research ethics approval        | 24  | Plans for seeking research ethics committee/institutional review board (REC/IRB) approval                                                                                                                                                                                                                                             | 24 |
| 36 |                                 |     |                                                                                                                                                                                                                                                                                                                                       |    |
| 37 |                                 |     |                                                                                                                                                                                                                                                                                                                                       |    |
| 38 | Protocol amendments             | 25  | Plans for communicating important protocol modifications (eg, changes to eligibility criteria, outcomes, analyses) to relevant parties (eg, investigators, REC/IRBs, trial participants, trial registries, journals, regulators)                                                                                                      | 21 |
| 39 |                                 |     |                                                                                                                                                                                                                                                                                                                                       |    |
| 40 |                                 |     |                                                                                                                                                                                                                                                                                                                                       |    |
| 41 |                                 |     |                                                                                                                                                                                                                                                                                                                                       |    |
| 42 |                                 |     |                                                                                                                                                                                                                                                                                                                                       |    |
| 43 |                                 |     |                                                                                                                                                                                                                                                                                                                                       |    |
| 44 |                                 |     |                                                                                                                                                                                                                                                                                                                                       |    |
| 45 |                                 |     |                                                                                                                                                                                                                                                                                                                                       |    |
| 46 |                                 |     |                                                                                                                                                                                                                                                                                                                                       |    |



|    |                               |     |                                                                                                                                                                                                                                                                                     |          |
|----|-------------------------------|-----|-------------------------------------------------------------------------------------------------------------------------------------------------------------------------------------------------------------------------------------------------------------------------------------|----------|
| 1  | Consent or assent             | 26a | Who will obtain informed consent or assent from potential trial participants or authorised surrogates, and how (see Item 32)                                                                                                                                                        | 10       |
| 2  |                               |     |                                                                                                                                                                                                                                                                                     |          |
| 3  |                               |     |                                                                                                                                                                                                                                                                                     |          |
| 4  |                               | 26b | Additional consent provisions for collection and use of participant data and biological specimens in ancillary studies, if applicable                                                                                                                                               | n/a      |
| 5  |                               |     |                                                                                                                                                                                                                                                                                     |          |
| 6  |                               |     |                                                                                                                                                                                                                                                                                     |          |
| 7  | Confidentiality               | 27  | How personal information about potential and enrolled participants will be collected, shared, and maintained in order to protect confidentiality before, during, and after the trial                                                                                                | 21       |
| 8  |                               |     |                                                                                                                                                                                                                                                                                     |          |
| 9  |                               |     |                                                                                                                                                                                                                                                                                     |          |
| 10 | Declaration of interests      | 28  | Financial and other competing interests for principal investigators for the overall trial and each study site                                                                                                                                                                       | 24       |
| 11 |                               |     |                                                                                                                                                                                                                                                                                     |          |
| 12 |                               |     |                                                                                                                                                                                                                                                                                     |          |
| 13 | Access to data                | 29  | Statement of who will have access to the final trial dataset, and disclosure of contractual agreements that limit such access for investigators                                                                                                                                     | 21       |
| 14 |                               |     |                                                                                                                                                                                                                                                                                     |          |
| 15 |                               |     |                                                                                                                                                                                                                                                                                     |          |
| 16 | Ancillary and post-trial care | 30  | Provisions, if any, for ancillary and post-trial care, and for compensation to those who suffer harm from trial participation                                                                                                                                                       | 21       |
| 17 |                               |     |                                                                                                                                                                                                                                                                                     |          |
| 18 |                               |     |                                                                                                                                                                                                                                                                                     |          |
| 19 |                               |     |                                                                                                                                                                                                                                                                                     |          |
| 20 | Dissemination policy          | 31a | Plans for investigators and sponsor to communicate trial results to participants, healthcare professionals, the public, and other relevant groups (eg, via publication, reporting in results databases, or other data sharing arrangements), including any publication restrictions | 21       |
| 21 |                               |     |                                                                                                                                                                                                                                                                                     |          |
| 22 |                               |     |                                                                                                                                                                                                                                                                                     |          |
| 23 |                               |     |                                                                                                                                                                                                                                                                                     |          |
| 24 |                               | 31b | Authorship eligibility guidelines and any intended use of professional writers                                                                                                                                                                                                      | 21       |
| 25 |                               |     |                                                                                                                                                                                                                                                                                     |          |
| 26 |                               | 31c | Plans, if any, for granting public access to the full protocol, participant-level dataset, and statistical code                                                                                                                                                                     | 21       |
| 27 |                               |     |                                                                                                                                                                                                                                                                                     |          |
| 28 |                               |     |                                                                                                                                                                                                                                                                                     |          |
| 29 | <b>Appendices</b>             |     |                                                                                                                                                                                                                                                                                     |          |
| 30 |                               |     |                                                                                                                                                                                                                                                                                     |          |
| 31 | Informed consent materials    | 32  | Model consent form and other related documentation given to participants and authorised surrogates                                                                                                                                                                                  | attached |
| 32 |                               |     |                                                                                                                                                                                                                                                                                     |          |
| 33 |                               |     |                                                                                                                                                                                                                                                                                     |          |
| 34 | Biological specimens          | 33  | Plans for collection, laboratory evaluation, and storage of biological specimens for genetic or molecular analysis in the current trial and for future use in ancillary studies, if applicable                                                                                      | n/a      |
| 35 |                               |     |                                                                                                                                                                                                                                                                                     |          |
| 36 |                               |     |                                                                                                                                                                                                                                                                                     |          |

\*It is strongly recommended that this checklist be read in conjunction with the SPIRIT 2013 Explanation & Elaboration for important clarification on the items. Amendments to the protocol should be tracked and dated. The SPIRIT checklist is copyrighted by the SPIRIT Group under the Creative Commons [“Attribution-NonCommercial-NoDerivs 3.0 Unported”](https://creativecommons.org/licenses/by-nc-nd/3.0/) license.

# BMJ Open

## Efficacy and cost-effectiveness of an online mindfulness program (MindOnLine) to reduce fear of recurrence among people with cancer: study protocol for a randomized controlled trial

|                               |                                                                                                                                                                                                                                                                                                                                                                                                                                                                                                                                                                                                                                                                                                                                                                                                                                                                                                                                                                                                                                                                                                                                                                                                                                                                                                                                                                                                                                                                                                                                                                                                                                                                                                                                                                                                                                                                                                                                                                                                                                                                                                                                                                                                                                                             |
|-------------------------------|-------------------------------------------------------------------------------------------------------------------------------------------------------------------------------------------------------------------------------------------------------------------------------------------------------------------------------------------------------------------------------------------------------------------------------------------------------------------------------------------------------------------------------------------------------------------------------------------------------------------------------------------------------------------------------------------------------------------------------------------------------------------------------------------------------------------------------------------------------------------------------------------------------------------------------------------------------------------------------------------------------------------------------------------------------------------------------------------------------------------------------------------------------------------------------------------------------------------------------------------------------------------------------------------------------------------------------------------------------------------------------------------------------------------------------------------------------------------------------------------------------------------------------------------------------------------------------------------------------------------------------------------------------------------------------------------------------------------------------------------------------------------------------------------------------------------------------------------------------------------------------------------------------------------------------------------------------------------------------------------------------------------------------------------------------------------------------------------------------------------------------------------------------------------------------------------------------------------------------------------------------------|
| Journal:                      | <i>BMJ Open</i>                                                                                                                                                                                                                                                                                                                                                                                                                                                                                                                                                                                                                                                                                                                                                                                                                                                                                                                                                                                                                                                                                                                                                                                                                                                                                                                                                                                                                                                                                                                                                                                                                                                                                                                                                                                                                                                                                                                                                                                                                                                                                                                                                                                                                                             |
| Manuscript ID                 | bmjopen-2021-057212.R1                                                                                                                                                                                                                                                                                                                                                                                                                                                                                                                                                                                                                                                                                                                                                                                                                                                                                                                                                                                                                                                                                                                                                                                                                                                                                                                                                                                                                                                                                                                                                                                                                                                                                                                                                                                                                                                                                                                                                                                                                                                                                                                                                                                                                                      |
| Article Type:                 | Protocol                                                                                                                                                                                                                                                                                                                                                                                                                                                                                                                                                                                                                                                                                                                                                                                                                                                                                                                                                                                                                                                                                                                                                                                                                                                                                                                                                                                                                                                                                                                                                                                                                                                                                                                                                                                                                                                                                                                                                                                                                                                                                                                                                                                                                                                    |
| Date Submitted by the Author: | 30-Nov-2021                                                                                                                                                                                                                                                                                                                                                                                                                                                                                                                                                                                                                                                                                                                                                                                                                                                                                                                                                                                                                                                                                                                                                                                                                                                                                                                                                                                                                                                                                                                                                                                                                                                                                                                                                                                                                                                                                                                                                                                                                                                                                                                                                                                                                                                 |
| Complete List of Authors:     | <p>Livingston, Patricia; Deakin University, Centre for Quality and Patient Safety Research in the Institute for Health Transformation; Deakin University, Faculty of Health</p> <p>Russell, Lahiru; Deakin University, Centre for Quality and Patient Safety Research in the Institute for Health Transformation</p> <p>Orellana, Liliana; Deakin University, Biostatistics Unit, Faculty of Health</p> <p>Winter, Natalie; Deakin University, Centre for Quality and Patient Safety Research in the Institute for Health Transformation</p> <p>Jefford, Michael; Peter MacCallum Cancer Centre, Medical Oncology</p> <p>Girgis, Afaf; Ingham Institute for Applied Medical Research, University of New South Wales, Centre for Oncology Education and Research Translation (CONCERT)</p> <p>Austin, David ; Deakin University Faculty of Health</p> <p>O, Eric; Deakin University Faculty of Health</p> <p>Mihalopoulos, Cathrine; Deakin University Faculty of Health, School of Health and Social Development</p> <p>Ugalde, Anna; Deakin University, Centre for Quality and Patient Safety Research in the Institute for Health Transformation</p> <p>Chambers, Richard; Monash University</p> <p>Phipps-Nelson, Jo; Peter MacCallum Cancer Centre</p> <p>Heath , Dishan; Western Health</p> <p>Botti, Mari; Deakin University, Centre for Quality and Patient Safety Research in the Institute for Health Transformation; Epworth HealthCare</p> <p>Rasmussen, Bodil; Deakin University, Centre for Quality and Patient Safety Research in the Institute for Health Transformation; Western Health</p> <p>Whitfield, Kathryn; Department of Health, Cancer Support Treatment and Research Unit; Community Based Health Services; Commissioning and System Improvement</p> <p>Ftanou, Maria; Peter MacCallum Cancer Centre, Psychosocial Oncology Department</p> <p>Smith, Allan; Ingham Institute for Applied Medical Research, University of New South Wales, Centre for Oncology Education and Research Translation (CONCERT)</p> <p>Pilatti, Kirsten; Breast Cancer Network Australia</p> <p>Sara, Sally; Prostate Cancer Foundation of Australia, Nursing Programs</p> <p>Wootten, Addie; Smiling Mind</p> <p>Gillan, Kate; Epworth HealthCare</p> |

1  
2  
3  
4  
5  
6  
7  
8  
9  
10  
11  
12  
13  
14  
15  
16  
17  
18  
19  
20  
21  
22  
23  
24  
25  
26  
27  
28  
29  
30  
31  
32  
33  
34  
35  
36  
37  
38  
39  
40  
41  
42  
43  
44  
45  
46  
47  
48  
49  
50  
51  
52  
53  
54  
55  
56  
57  
58  
59  
60

|                                   |                                                                                                                                                                                                                                                                                                                         |
|-----------------------------------|-------------------------------------------------------------------------------------------------------------------------------------------------------------------------------------------------------------------------------------------------------------------------------------------------------------------------|
|                                   | Singh, Madhu; Andrew Love Cancer Centre, Barwon Health, University Hospital<br>Campbell, David; Andrew Love Cancer Centre, Barwon Health, University Hospital<br>Pillay, Brindha; Peter MacCallum Cancer Centre, Department of Clinical Psychology<br>White, Vicki ; Deakin University School of Psychology, Psychology |
| <b>Primary Subject Heading:</b>   | Oncology                                                                                                                                                                                                                                                                                                                |
| <b>Secondary Subject Heading:</b> | Communication, Mental health, Public health                                                                                                                                                                                                                                                                             |
| <b>Keywords:</b>                  | ONCOLOGY, Health economics < HEALTH SERVICES ADMINISTRATION & MANAGEMENT, World Wide Web technology < BIOTECHNOLOGY & BIOINFORMATICS                                                                                                                                                                                    |
|                                   |                                                                                                                                                                                                                                                                                                                         |

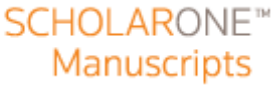

1  
2  
3  
4  
5 **1 Title**

6  
7  
8 2 Efficacy and cost-effectiveness of an online mindfulness program (MindOnLine) to reduce  
9 3 fear of recurrence among people with cancer: study protocol for a randomized controlled trial  
10 4

11 **5 Authors**

12 6 Livingston PM\*<sup>1,2</sup>, Russell L<sup>1</sup>, Orellana L<sup>3</sup>, Winter N<sup>1</sup>, Jefford M<sup>4</sup>, Girgis A<sup>5</sup>, Austin DW<sup>2</sup>,  
13 7 Eric O<sup>2</sup>, Mihalopoulos C<sup>6</sup>, Ugalde A<sup>1</sup>, Chambers R<sup>7</sup>, Phipps-Nelson J<sup>4</sup>, Herath D<sup>8</sup>, Botti M<sup>1,9</sup>,  
14 8 Rasmussen B<sup>1,8</sup>, Whitfield K<sup>10</sup>, Ftanou M<sup>4</sup>, Smith AB<sup>5</sup>, Pilatti K<sup>11</sup>, Sara S<sup>12</sup>, Wootten A<sup>13</sup>,  
15 9 Gillan K<sup>9</sup>, Singh M<sup>14</sup>, Campbell D<sup>14</sup>, Pillay B<sup>4</sup>, White V<sup>15</sup>  
16 10

17 11 <sup>1</sup> Centre for Quality and Patient Safety Research, Institute for Health Transformation; Deakin  
18 12 University; 1 Gheringhap St, Geelong, Victoria, 3220, Australia.

19 13 <sup>2</sup>Faculty of Health, Deakin University, Geelong, Vic, Australia

20 14 <sup>3</sup>Biostatistics Unit, Faculty of Health, Deakin University, Geelong, Vic, Australia

21 15 <sup>4</sup>Peter MacCallum Cancer Centre, Melbourne, Vic, Australia

22 16 <sup>5</sup>Centre for Oncology Education and Research Translation (CONCERT), Ingham Institute for  
23 17 Applied Medical Research, South Western Sydney Clinical School, University of New South  
24 18 Wales, NSW, Australia

25 19 <sup>6</sup>School of Health and Social Development, Faculty of Health, Deakin University, Geelong,  
26 20 Vic, Australia

27 21 <sup>7</sup>Monash University, Melbourne, Australia

28 22 <sup>8</sup>Western Health, Melbourne, Vic, Australia

29 23 <sup>9</sup>Epworth HealthCare, Melbourne, Vic, Australia

30 24 <sup>10</sup>Cancer Support Treatment and Research Unit; Community Based Health Services;  
31 25 Commissioning and System Improvement; Department of Health, Melbourne, Vic, Australia

32 26 <sup>11</sup>Breast Cancer Network Australia, Melbourne, Vic, Australia

33 27 <sup>12</sup>Prostate Cancer Foundation Australia, Melbourne, Vic, Australia

34 28 <sup>13</sup>Smiling Mind

35 29 <sup>14</sup>Andrew Love Cancer Centre, Barwon Health, University Hospital, Geelong, Vic, Australia

36 30 <sup>15</sup>School of Psychology, Faculty of Health, Deakin University, Geelong, Vic, Australia

37 31 \*Corresponding Author: Patricia Livingston, Centre for Quality and Patient Safety Research  
38 32 in the Institute for Health Transformation, 1 Gheringhap St, Geelong, Victoria Australia,  
39 33 Faculty of Health, Deakin University, Geelong, Vic, Australia. Email:  
40 34 trish.livingston@deakin.edu.au  
41  
42  
43  
44  
45  
46  
47  
48  
49  
50  
51  
52  
53  
54  
55  
56  
57  
58  
59  
60

## 35 **Abstract**

36 **Introduction:** Fear of cancer recurrence (FCR) is a common condition among cancer survivors  
37 that can lead to significant levels of distress, anxiety and depression. Online mindfulness  
38 programs may provide the mechanism to support cancer survivors manage FCR and distress,  
39 and improve people's wellbeing over the short, medium and long term. The primary aim of  
40 this study is to determine the potential efficacy of MindOnLine, a 9 session mindfulness-based  
41 program for survivors of breast, prostate and colorectal cancer. A formal economic program  
42 will also be conducted.

43 **Methods and analysis:** A single-blind randomized controlled trial to determine the efficacy  
44 and cost-efficacy of a MindOnLine program for cancer survivors. A total of 400 people living  
45 with cancer will be recruited via online advertisements on social media platforms, peak  
46 consumer advocacy groups, or through outpatient services at healthcare providers across  
47 Victoria Australia. People will be randomly allocated to either the MindOnLine program  
48 (n=200) or waitlist control (n=200). Participant assessments will occur at baseline, at 9 weeks  
49 and 9-month follow up. The primary outcome is change in Fear of Recurrence Index Score  
50 total score between baseline and 9 weeks; secondary outcomes are changes in depression and  
51 anxiety, quality of life and mindfulness. The economic analysis comprises a cost-consequences  
52 analysis where all outcomes will be compared to costs.

53 **Ethics and dissemination:** Ethics approval was obtained from the Peter MacCallum Cancer  
54 Centre (20-53) and Deakin University (2020-284). All participants will be required to provide  
55 written informed consent. Findings will be disseminated in peer reviewed journals and among  
56 key stakeholder organisations including hospitals, cancer and community organisations and  
57 Government. If successful the project will be rolled out nationally with a formal  
58 implementation plan.

1  
2  
3 59 **Australian New Zealand Clinical Trials Registry:** 12620000645954. Registered 06 June  
4  
5 60 2020,

6  
7  
8 61 <https://www.anzctr.org.au/Trial/Registration/TrialReview.aspx?id=379520&isReview=true>

9  
10 62 **Keywords:** mindfulness, cancer, fear of cancer recurrence, online; economics of cancer;  
11  
12 63 supportive care; web-based platforms

## 13 14 15 16 64 **Article Summary**

### 17 18 19 65 **Strengths and limitations of this study**

#### 20 21 66 Strengths

22  
23 67 • This study will employ a single-blind randomized controlled trial to determine the efficacy  
24  
25 68 and cost-efficacy of MindOnLine.

26  
27 69 • Advances in social platforms, smartphone technology and web-based programming can  
28  
29 70 change substantially in a short period and while this may affect the actual online platform  
30  
31 71 used measures are in place to maintain the same intervention during the study period, so we  
32  
33 72 do not consider this will influence the program content or delivery mechanisms.

34  
35 73 • Involvement of consumer advocacy groups to support recruitment, interpretation of results,  
36  
37 74 dissemination and translation

38  
39 75 • Incorporating an economic evaluation into the study design will complement clinical findings  
40  
41 76 and support decision-making processes for potential scaling

#### 42 43 44 77 Limitations

45  
46 78 • Recruitment primarily through social media platforms means we cannot accurately assess  
47  
48 79 reach of the intervention, as we will not be able to identify the number of eligible people  
49  
50 80 exposed to our advertisements

51  
52 81 • Participants will need access to the internet which will result in some people unable to take  
53  
54 82 part in the study.

## 83 Introduction

84 Over one million Australians are cancer survivors, and this population is expected to grow  
85 substantially due to an ageing population and improved community-based screening programs  
86 and treatments.[1] A cancer diagnosis can cause people to confront their own mortality, often  
87 for the first time,[2] so it may be unsurprising that three quarters of cancer survivors experience  
88 fear of cancer recurrence (FCR) and 49% report moderate to high levels of fear,[3] as well as  
89 high levels of clinical depression [3] and anxiety.[4]

90  
91 FCR is a highly prevalent and persistent condition that can result in significant levels of anxiety  
92 and depression across the disease trajectory.[5] It is imperative to address this issue and our  
93 recent work into early psychosocial support indicates it may be possible to significantly reduce  
94 FCR through an online mindfulness program.[6] Mindfulness is a state of mind in which one  
95 pays attention to the present experience in a nonjudgmental, curious, and accepting way. Some  
96 studies have shown mindfulness is associated with improved mental health outcomes and  
97 management of the emotional consequences of cancer, [7, 8] while other have found no  
98 effect.[9]

99  
100 Mindfulness-based interventions consist of regular informal and formal mindfulness  
101 meditation practices and are supported by educational principles that are person and  
102 relationship-centred.[10] Research into the use of mindfulness has mostly evaluated face-to-  
103 face programs which are time-intensive, of limited accessibility and costly.[11] Online  
104 mindfulness programs represent a potentially cost-effective mechanism to help people with  
105 physical health conditions.[12] For cancer survivors, there is evidence that online mindfulness  
106 programs may help manage FCR and distress, and improve mental wellbeing over the short,  
107 medium and long term.[2]

1  
2  
3 108 There is also some evidence that online mindfulness-based cognitive therapy (MBCT) can  
4  
5 109 improve psychological outcomes. A recent study compared an online program to face-to-face  
6  
7  
8 110 MBCT which showed improved outcomes [13], however, the sample comprised of mainly  
9  
10 111 breast cancer survivors and it is unclear whether the program would assist with other cancer  
11  
12 112 types[13]. Although this intervention was found to be as effective as a face-to-face MBCT in  
13  
14 113 reducing psychological distress and FCR in cancer patients, [13], there is a lack of robust  
15  
16  
17 114 evidence assessing the effectiveness of a general online mindfulness program for cancer  
18  
19 115 survivors, limiting capacity for implementation and dissemination.[14, 15]  
20  
21  
22 116

23  
24 117 The aim of this study is to conduct a randomised controlled trial of *MindOnLine*, an online 9  
25  
26 118 session mindfulness-based intervention, for survivors of breast, prostate and colorectal cancer,  
27  
28 119 the most common solid tumours among men and women in Australia, [1] to determine the  
29  
30 120 effectiveness and cost-effectiveness of the program.  
31  
32

### 33 121 *Preliminary work*

34  
35 122 To inform the development of *MindOnLine*, we undertook a systematic review of  
36  
37 123 methodologies for internet based mindfulness interventions.[16] This review showed a dearth  
38  
39 124 of studies with long-term follow up periods. Our team also conducted an exploratory study on  
40  
41 125 the knowledge of, attitudes toward and behaviours regarding meditation among patients with  
42  
43 126 melanoma.[17] Our study of 291 cancer survivors recruited at a single tertiary cancer hospital  
44  
45 127 found that a key barrier to engaging with meditation was a lack of knowledge about its practice.  
46  
47 128 Findings also indicated interest in an online meditation-based intervention once informed about  
48  
49 129 possible benefits of meditation for people with cancer. Those interested in an online  
50  
51 130 meditation-based program reported higher perceived stress, indicating a need for such a  
52  
53 131 program.  
54  
55  
56  
57  
58  
59  
60



1  
2  
3 133 MindOnline was initially developed as a 6-week online mindfulness-based intervention and  
4  
5 134 follows the Framework for mindfulness-based program described by Crane and colleagues.  
6  
7  
8 135 [10] The program promoted awareness and acceptance of thoughts and emotions, and  
9  
10 136 empowered participants to address their distressing thoughts and emotions in more adaptive  
11  
12 137 ways. Through this action, participants learn to manage anxious and depressive moods. These  
13  
14 138 moods are triggered by unhelpful and intrusive thoughts, which are strongly associated with  
15  
16 139 moderate to high levels of fear of cancer recurrence. [18] A pilot study was conducted to assess  
17  
18 140 the potential impact of a 6-week mindfulness program and explore whether the intervention  
19  
20 141 impacted on FCR, worry, and perceived stress compared to usual care. Details of the pilot study  
21  
22 142 are published elsewhere.[6] Briefly, 69 melanoma survivors agreed to participate, and 46  
23  
24 143 participants were randomised into the intervention group (2:1). Scores on all FCR Inventory  
25  
26 144 (FCRI) subscales reduced in the intervention group, with the severity subscale decreasing  
27  
28 145 significantly compared to the control group (-2.6, 95% CI=(-4.4, -0.7); p=0.008) after 6 weeks.  
29  
30 146 The total FCRI score also showed a decrease albeit non-significant (-6.2, 95% CI=(-13.12,  
31  
32 147 0.68), p=0.07). Previous studies have indicated that a 4.1 point decrease on the severity scale  
33  
34 148 is a clinically important change. [19]  
35  
36 149 Based on participant feedback from the pilot study [6] regarding the benefits of mindfulness  
37  
38 150 practice and the suggestion of a maintenance period to enhance sustainability of the effects,  
39  
40 151 *MindOnLine* was expanded to a 9-week program with the last 3 weeks revisiting concepts  
41  
42 152 already explored in the program and supporting regular practice. The structure of MindOnLine  
43  
44 153 reflects the Mindfulness Based Stress Reduction (MBSR) approach by incorporating  
45  
46 154 characteristics typical of mindfulness-based programs, namely educational component, and  
47  
48 155 formal and informal mindfulness practices. Keeping in line with Crane et al's., [10] Framework  
49  
50 156 for adaptation of mindfulness-based programs, MindOnLine adapted the delivery of the  
51  
52 157 program to an online version to facilitate access and convenience of use.  
53  
54  
55  
56  
57  
58  
59  
60

## 158 **Methods and analysis**

### 159 **Aims and Hypotheses**

160 The aims of this study are to determine the effect of *MindOnLine* on FCR, anxiety and  
161 depression in cancer survivors. The specific aims are:

162 **Aim 1:** To evaluate the impact of the *MindOnLine* intervention on the primary outcome (FCR),  
163 measured using the FCRI total score [20] at the end of the 9-week intervention period.

164 *HYPOTHESIS 1:* Participants receiving the intervention will report lower average FCRI total  
165 scores at 9 weeks, compared to the waitlist group.

166 **Aim 2:** To evaluate the impact of *MindOnLine* on secondary outcomes at nine weeks: 1)  
167 Anxiety and Depression, using the Patient Health Questionnaire (PHQ-9)[21]and Generalised  
168 Anxiety Disorder (GAD-7) Scale;[22]2) Quality of Life (QoL) measured by AQOL-  
169 4D;[23]and 3) Mindfulness, using Cognitive and Affective Mindfulness Scale-Revised  
170 (CAMS-R).[24]*HYPOTHESIS 2:* Compared to the waitlist group, participants in the  
171 intervention group will report improvement in all of the secondary outcomes at nine weeks.

172 **Aim 3:** To assess To assess if the effect of the intervention on the primary and secondary  
173 outcomes, relative to usual care, are sustained at the nine-month follow-up. are sustained at the  
174 nine-month follow-up. *HYPOTHESIS 3:* Compared to the waitlist group, participants in the  
175 intervention group will report sustained improvement in primary and secondary outcomes at  
176 nine months.

177 **Aim 4:** To assess, from a health sector and broader societal perspective, the cost-effectiveness  
178 of *MindOnLine*. *HYPOTHESIS 4:* Compared to the waitlist group, *MindOnLine* will be cost-  
179 effective with an incremental cost-effectiveness ratio likely to fall below the commonly used  
180 threshold of \$28,000 - \$50,000/Quality of Life Year (QALY).

181

## 182 **Study Design**

183 This study is a randomised controlled trial, to test the effectiveness and cost-effectiveness of  
184 MindOnLine compared to usual care on FCR, anxiety, depression and QoL among people  
185 diagnosed with breast, prostate or colorectal cancer. Overall, 400 patients will be recruited with  
186 200 patients randomly allocated to the intervention group and 200 to the waitlist group (usual  
187 care only). The intervention group will receive usual care and the online mindfulness program.  
188 Primary and secondary outcomes will be collected at baseline, nine weeks and nine months  
189 post randomisation. Nine months corresponds to approximately six months following the end  
190 of the intervention period. Following completion of the study (9 months), participants in the  
191 waitlist group will be offered the *MindOnLine* intervention (Figure 1).

192

## 193 **Participants**

194 People with a diagnosis of breast, prostate or colorectal cancer will be recruited via online  
195 advertisements on social media platforms, peak consumer advocacy groups for each cancer  
196 Breast Cancer Network Australia (BCNA), or Prostate Cancer Foundation Australia (PCFA),  
197 Bowel Cancer Australia social media platforms and colorectal cancer support groups, or  
198 through outpatient services at healthcare providers across Victoria, see Figure 1.

1  
2  
3 199 **Figure 1.** Study flowchart  
4

5 200  
6

7  
8 201  
9

10 202  
11

12 203  
13

14 204  
15

16  
17 205  
18

19 206  
20

21 207  
22

23 208  
24

25 209  
26

27 210  
28

29 211  
30

31 212  
32

33  
34  
35 213 FCRI (Fear of Cancer Recurrence Inventory); GAD-7 (General Anxiety and Distress scale; PHQ-9 (Patient Health Questionnaire); CAMS-R

36  
37  
38 214 (Cognitive and Affective Mindfulness Scale – Revised); AQoL-4D (Assessment of Quality of Life – 4 Dimensions)  
39  
40

1  
2  
3 215 **Inclusion criteria**  
4

5 216 Adults, aged 18 year of older, living in Australia, who completed active treatment for Stage  
6  
7 217 1-3 breast, prostate or colorectal cancer (CRC), (trastuzumab/similar, and hormone treatment  
8  
9 218 exempt) within the past 5 years and have no evidence of disease; have internet access and a  
10  
11 219 FCRI severity score  $\geq 13$ , indicating clinically significant FCR.[19] Our pilot study showed  
12  
13 220 74% of participants with melanoma were identified as having clinically significant FCR. [6]  
14  
15  
16

17 221

18  
19 222 **Exclusion criteria**  
20

21 223 Insufficient English language skills to understand videos presented in English, complete  
22  
23 224 surveys in English or living with advanced cancer (Stage IV disease with less than a 12 month  
24  
25 225 prognosis of survival).  
26  
27

28 226

29 227 **Recruitment procedures**  
30

31 228 Multiple methods will be applied to recruit people to the study:

32  
33 229 1) online through *MindOnLine* social media pages including Facebook, Instagram, Twitter,  
34  
35 230 Reddit and LinkedIn  
36

37 231 2) sharing recruitment flyers through BCNA and PCFA social media platforms, and Australian  
38  
39 232 based cancer groups  
40

41  
42 233 3) email invitations sent to BCNA and PCFA supporters (and colorectal cancer support groups)  
43  
44 234 and cancer registries  
45

46 235 4) paid Facebook and Instagram advertising  
47

48  
49 236 5) through outpatient clinics, chemotherapy and radiotherapy units and rooms of oncologists  
50  
51 237 and surgeons at cancer treatment centres.  
52

53  
54 238 **Online recruitment procedure**  
55

56 239 1) The *MindOnLine* social media pages will be shared among social networks and will allow  
57  
58 240 people to post questions about the project. 2) A recruitment flyer will be distributed by BCNA,  
59  
60

1  
2  
3 241 PCFA, Bowel Cancer Australia and colorectal cancer Facebook support groups using their  
4  
5 242 existing social media platforms. 3) Study invitations will be sent to supporters registered with  
6  
7 243 BCNA and PCFA who have indicated an interest in learning about research projects. 4) Paid  
8  
9 244 advertisements will run throughout the recruitment period on Facebook, Instagram and Twitter  
10  
11 245 to distribute the project details to a wider audience. The use of paid advertisements in health  
12  
13 246 research is becoming popular and a systematic review has shown this to be an effective  
14  
15 247 recruitment strategy.[25]

16  
17  
18 248 In all online recruitment methods, people will have access to the recruitment flyer, which will  
19  
20 249 provide a brief overview of the study, the link to the *MindOnLine* registration page and the  
21  
22 250 contact number of the project manager.  
23

24  
25  
26 251

### 27 28 252 **Health service recruitment procedures**

29  
30 253 If recruitment across social media platforms, advertisements and peak consumer advocacy  
31  
32 254 groups does not generate sufficient participation levels, participating health services  
33  
34 255 oncologists or surgeons involved in the project, will support the recruitment process. The  
35  
36 256 research assistant (RA) at each site will screen patients and confirm eligibility of patients with  
37  
38 257 treating clinicians or with nurses working in the outpatient units. RAs will then contact patients  
39  
40 258 by phone and interested patients will be emailed the study details with a link to the study  
41  
42 259 webpage and registration page). If there is no response from patients, a message will be left  
43  
44 260 on their phone. Two further attempts to reach patients will be made (a week apart), and after a  
45  
46 261 third unsuccessful attempt no further contact will be made. If patients have not enrolled in the  
47  
48 262 study within two weeks, one follow-up phone call will be made to answer any queries patients  
49  
50 263 may have about the study and to assist with registration. We have used similar screening and  
51  
52 264 recruitment approaches in previous studies and they were found to be acceptable and  
53  
54 265 successful.[6]We anticipate a recruitment period of 18-months.  
55  
56  
57  
58  
59  
60

1  
2  
3 266  
45  
6 267 **Consent and screening**

7 268 Once directed to the *MindOnLine* registration page, participants will be presented with the plain  
8  
9 269 language statement and then asked to provide consent (Supplementary file 1). Potential  
10  
11 270 participants will be asked to provide basic demographic and disease information allowing  
12  
13 271 screening to ensure they meet study eligibility criteria. Potential participants will also complete  
14  
15 272 the severity subscale of the FCRI to allow those with scores  $\geq 13$  to be screening into the study.  
16  
17 273 Those screened into the study will provide their email address and contact number, and directed  
18  
19 274 to the baseline questionnaires. People who are not eligible will receive an online message  
20  
21 275 thanking them for their interest in the study and referring them to local support services  
22  
23 276 provided by leading cancer charities should they require support.  
24  
25  
26  
27

28 277  
2930 278 **Randomisation**

31 279 Eligible participants will be allocated to treatment groups using random sequences embedded  
32  
33 280 in the online survey platform Qualtrics, ensuring allocation concealment. Randomisation  
34  
35 281 (using stratified random permuted blocks) will be conducted in blocks of size 2, stratified by  
36  
37 282 cancer type (breast, prostate, CRC) and age ( $<60$ ;  $\geq 60$  years old). Participants will be unblinded  
38  
39 283 to group assignment, while researchers and data analysts will be blinded to the group condition.  
40  
41  
42  
43

44 284

45  
46 285 **Waitlist Control group**

47 286 Participants allocated to the waitlist group will receive usual care. Following randomisation,  
48  
49 287 they will receive an email with a list of services they may contact for information and  
50  
51 288 support. They will be informed that they will be granted access to *MindOnLine* intervention  
52  
53 289 in 9-month's time, when intervention participants have completed the final survey.  
54  
55  
56  
57  
58  
59  
60

290 **Intervention group – MindOnLine program**

291 Participants allocated to the intervention will be provided with the link to *MindOnLine*, which

292 comprises three main components:

293 (1) an educational component to increase participants' knowledge about the science and  
294 practice of mindfulness and how it may benefit them in everyday life;

295 (2) a formal mindfulness meditation practice to improve awareness and emotion regulation;

296 and

297 (3) an informal practice to teach participants how to bring mindfulness to daily activities.

298 A new theme is introduced each week, with a new meditation practice which participants will

299 be encouraged to undertake every day *The MindOnLine* program is detailed in Table 1.

300

301 Table 1- Weekly content of the *MindOnLine* Program

| Week | Theme                       | Meditation                               | Daily practice                              |
|------|-----------------------------|------------------------------------------|---------------------------------------------|
| 1    | Introduction to mindfulness | Breath                                   | Being present with the experience           |
| 2    | Reducing stress             | Body Scan                                | Notice how the body responds to stress      |
| 3    | Relating to emotions        | Working mindfully with emotions          | Noticing the cycle of emotions              |
| 4    | Self-compassion             | Self-compassion                          | Notice self-criticism                       |
| 5    | Communicating mindfully     | Listening/ Sound meditations             | Bringing attention back to the conversation |
| 6    | Living mindfully            | Practising with gentleness and patience  | Pause throughout the day                    |
| 7    | Reducing worries            | Mindfully working with worries and fears | Notice when caught up overthinking          |



|   |                            |                            |                                           |
|---|----------------------------|----------------------------|-------------------------------------------|
| 8 | Reducing worries mindfully | Loving Kindness meditation | Notice acts of kindness                   |
| 9 | Maintaining mindfulness    | Silence with bells         | Notice when distracted from being present |

302

303 Each module's theme will be explained through a short 5-10 minute video. At the end of each  
 304 week, participants will receive an email with a link to the video introducing the theme for the  
 305 upcoming week. The transcripts for the videos will be available for downloading and saving or  
 306 printing in a pdf format so that participants can keep a copy for later reference. At the end of  
 307 each module, participants will receive an automatically generated email reminding them to  
 308 continue daily meditation practice (formal practice) and given specific everyday mindfulness  
 309 exercises to apply during daily activities (informal practice).

310

311 To enhance adherence and retention to the 9-week program and deepen their mindfulness  
 312 experience, participants will have access to additional program features. The features are  
 313 guided by a framework proposed by Abraham and Michie [26] to facilitate behaviour change  
 314 in interventions:

315 1) Twice daily reminders to complete mindfulness practice. Adapted from the pilot study,  
 316 emails containing a link to a short, guided meditation audio file will be sent to  
 317 participants twice daily. These emails will serve as reminders to meditate and will  
 318 provide easy access to the meditation practice of the week.

319 2) Progress tracking. Participants will be able to monitor their own mindfulness practice  
 320 each day by reviewing how many times they have used each section of the program,  
 321 and the duration of use. Embedded usage data tracking systems records each login and  
 322 provides real time representation of program use.

1  
2  
3 323 3) Goal setting. When enrolled in the program, participants will have the opportunity to  
4  
5  
6 324 set goals for their mindfulness practice (Figure 2). Goals are linked to usage data  
7  
8 325 tracking to provide participants with feedback about whether they are reaching their  
9  
10 326 goals. Goals may be practice orientated e.g. to practise mindfulness for five minutes  
11  
12 327 each day, or may be specific to each person's situation e.g. I would like to manage my  
13  
14 328 worries leading up to my oncologist appointment.

15  
16  
17 329 4) Reflective journaling. Participants will have the opportunity to journal their experiences  
18  
19 330 during the mindfulness program by using the "My Journal" functionality (Figure 3).  
20  
21 331 Each week's content will have a journal section, which will include prompts related to  
22  
23 332 mindfulness program content, participants will be able to enter and save their responses  
24  
25 333 within the program for future review. Prompts will be developed specifically for the  
26  
27 334 study.

28  
29  
30  
31 335 The mindfulness program can be accessed at any time via direct login to the website or via the  
32  
33 336 hyperlink sent to participants in the daily e-mails.

34  
35  
36 337

37  
38 338 Figure 2. My Goal functionality in MindOnLine

39  
40  
41 339 (Insert Figure 2 here)

42  
43 340

44  
45 341

46  
47 342 Figure 3. My Journal guided self-reflection practise in MindOnLine

48  
49 343 (Insert Figure 3 here)

50  
51 344

### 52 53 54 345 **Data collection**

55  
56 346 Table 2 illustrates the overall schedule for trial participants in both groups. All assessments  
57  
58 347 will be performed online. The questionnaires at baseline, at nine weeks including the  
59  
60

348 satisfaction survey for those in the intervention group and at nine months, will be sent via  
 349 Qualtrics through an automatically generated schedule. Participants who do not complete  
 350 questionnaires will be followed up by telephone at each data collection point. At baseline,  
 351 participants' demographic information (i.e., gender, age, marital status, current employment  
 352 status, highest level of education, postcode, type of cancer, date of diagnosis, time since end of  
 353 last treatment, type of treatment and previous meditation experience) will be collected.

354

355 Table 2. Schedule of enrolment, interventions, and assessments

356

| TIMEPOINT                         | STUDY PERIOD |            |                 |        |        |        |        |        |        |        |        |                   |
|-----------------------------------|--------------|------------|-----------------|--------|--------|--------|--------|--------|--------|--------|--------|-------------------|
|                                   | Enrolment    | Allocation | Post-allocation |        |        |        |        |        |        |        |        | Post-Intervention |
|                                   |              |            | Week 1          | Week 2 | Week 3 | Week 4 | Week 5 | Week 6 | Week 7 | Week 8 | Week 9 | 9-months          |
| <b>ENROLMENT:</b>                 |              |            |                 |        |        |        |        |        |        |        |        |                   |
| Eligibility screen                | X            |            |                 |        |        |        |        |        |        |        |        |                   |
| Informed consent                  | X            |            |                 |        |        |        |        |        |        |        |        |                   |
| Allocation                        |              | X          |                 |        |        |        |        |        |        |        |        |                   |
| <b>INTERVENTIONS:</b>             |              |            |                 |        |        |        |        |        |        |        |        |                   |
| Immediate access to MindOnLine    |              |            | ←—————→         |        |        |        |        |        |        |        |        |                   |
| Waitlist group                    |              |            |                 |        |        |        |        |        |        |        |        |                   |
| <b>ASSESSMENTS (Both groups):</b> |              |            |                 |        |        |        |        |        |        |        |        |                   |
| Demographic characteristics       | X            |            |                 |        |        |        |        |        |        |        |        |                   |
| FCRI [18]                         | X            |            |                 |        |        |        |        |        |        | X      | X      |                   |
| GAD-7 [20]                        | X            |            |                 |        |        |        |        |        |        | X      | X      |                   |
| PHQ-9 [19]                        | X            |            |                 |        |        |        |        |        |        | X      | X      |                   |
| CAMS-R [22]                       | X            |            |                 |        |        |        |        |        |        | X      | X      |                   |
| AQoL-AD [21]                      | X            |            |                 |        |        |        |        |        |        | X      | X      |                   |
| Mindfulness experience            | X            |            |                 |        |        |        |        |        |        | X      | X      |                   |
| Resource use                      | X            |            |                 |        |        |        |        |        |        | X      | X      |                   |

|                                               |   |  |   |   |   |   |   |   |   |   |   |   |
|-----------------------------------------------|---|--|---|---|---|---|---|---|---|---|---|---|
| <i>COVID-19 measures</i>                      | X |  |   |   |   |   |   |   |   |   | X | X |
| <b>ASSESSMENTS (Intervention group only):</b> |   |  |   |   |   |   |   |   |   |   |   |   |
| <i>Adherence tracking and meditation log</i>  |   |  | X | X | X | X | X | X | X | X | X | X |
| <i>Program satisfaction</i>                   |   |  |   |   |   |   |   |   |   |   | X | X |

357

358 **Outcome measures**359 **Primary outcome**360 **Fear of Cancer Recurrence Inventory (FCRI)**

361 The 42-item Fear of Cancer Recurrence Inventory (FCRI) is a multidimensional FCR scale  
 362 intended for use with all cancer patients. Items were developed on the basis of a cognitive–  
 363 behavioural formulation of FCR (range:0-168).[19] The FCRI consists of seven domains:  
 364 triggers, severity, psychological distress, functional impairment, reassurance, insight and  
 365 coping strategies (scoring range:0-36). It has shown high internal consistency, good construct  
 366 and criterion validity in adults with different cancer types.[20]

367

368 **Secondary outcomes:**369 **Anxiety and Depression**

370 The *Generalized Anxiety Disorder-7 scale (GAD-7)* [22] is a valid and efficient tool for  
 371 assessing generalised anxiety symptoms and assessing severity in clinical practice and  
 372 research. The seven items assess the frequency of core symptoms of generalised anxiety  
 373 disorder within the past 2 weeks (scoring range:0-21).[22]

374 The *Patient Health Questionnaire-9 (PHQ-9)*[20] parallels the nine diagnostic symptom  
 375 criteria that define DSM-IV major depressive disorder. At only 9 items (scoring range:0-27),  
 376 the PHQ-9 is shorter than most depression tools. Unlike most other measures of depression,  
 377 the PHQ-9 was developed, tested and refined for use with medical patients.[21]

378 The PHQ-9 and GAD-7 are recommended for use among cancer survivors in the American  
 379 Society of Clinical Oncology Guidelines. [27]

380

**381 Mindfulness**

382 Trait mindfulness is measured using the Cognitive and Affective Mindfulness Scale-Revised  
383 (CAMS-R), [24] a 10-item self-report questionnaire. This scale uses everyday language  
384 appropriate for those with little meditation experience and is designed to capture mindfulness  
385 as a general daily experience. The questionnaire comprises four domains of mindfulness  
386 (attention, present-focus, awareness, and acceptance/non-judgment). Participants are asked to  
387 rate on a four-point Likert scale how much they relate to each statement (scoring range:4-40).  
388 Compared to other measures of mindfulness, the CAMS-R is unique in that it is related to  
389 psychological distress, [28] which is highly relevant to the current study population.[29]

390

**391 Other outcome measures****392 Mindfulness experience**

393 In order to control for access to external mindfulness-based programs particularly in the waitlist  
394 group, all participants will be asked whether they have enrolled in a mindfulness-based  
395 program in the period between surveys and/or used other supportive care services (e.g. peer  
396 support, psychologists, psychotherapy, counsellors, yoga and meditation).

397

**398 Program satisfaction**

399 Participants in the intervention group will be asked to provide feedback about the *MindOnline*  
400 program. Quantitative and qualitative data using open ended questions will be collected in  
401 relation to satisfaction with program content, the helpfulness of the program, usability, and  
402 areas for improvement. The satisfaction questionnaire has been adapted from the satisfaction  
403 questionnaire used in the pilot study.[6]

404

### 405 **Economic outcomes**

406 *Assessment of Quality of Life (AQoL 4D)* [23] is a health-related quality of life utility measure.

407 It is generally used in economic evaluations. The *Resource Use Questionnaire* covers general  
408 health care services usage (self-reported), use of other welfare services, and impacts on work  
409 force participation. The questionnaire has been successfully used in cancer psychosocial  
410 intervention studies. [30]

411 The surveys will take approximately 20 minutes to complete.

412

### 413 **Adherence tracking and meditation log**

414 The software package used to run *MindOnLine* was developed at Deakin University and has  
415 inbuilt functionality to collect and clean usage data. Google Analytics has been incorporated  
416 into the platform to allow for validation of findings. Both software will track participants'  
417 online activity, including login date/times, navigation patterns, page views and duration, and  
418 features used (video, audio, goals and reflective journaling).

419

### 420 **Impact of COVID-19**

421 To control for potential environmental impacts on mental wellbeing outcomes, participants will  
422 be asked whether COVID-19 has had an impact on their mental wellbeing in the two weeks  
423 prior to baseline, 9-weeks and 9-month assessments.

424

### 425 **Sample size calculations**

426 Power calculations are conservative, i.e. the detectable differences reported below are possibly  
427 larger than the true detectable differences, because they are based on two-group comparison of  
428 change while the main analysis (see Analysis Plan) will adjust for baseline values of the  
429 outcome and for factors used in the stratified randomisation.[31] The statistical software PASS  
430 version 14.0.9 (NCSS, LLC) was used for all calculations ( $\alpha=0.05$ ; two-sided tests).

431

**432 Primary outcome**

433 Change in FCRI total score between baseline and 9 weeks. The target sample size (200  
434 participants per arm) achieves 94% (80%) power to detect a mean difference between arms of  
435 10 points (8 points) change in FCRI score or 80% power to detect a difference of 8 points  
436 [standard deviation (SD): 23.5;[32)]SD estimate obtained from Butow et al., [32]as their study  
437 included a heterogenous sample of cancer patients while our pilot study only included patients  
438 with melanoma Stage 2-3. The selected effect sizes correspond to Cohen's *d* of 0.43  
439 (moderate/large) and 0.34 (small/moderate) respectively. Currently, there is no definition of a  
440 clinically significant improvement for FCRI score, however, the proposed effect size is  
441 comparable to that described in other studies.[32]

442

**443 Secondary outcomes**

444 The target sample size (200 participants per arm) achieves 80% power to detect an intervention  
445 effect of size 0.34 (Cohen's *f*, small/moderate) at 9 weeks for any of the outcomes. This effect  
446 size corresponds to mean differences between groups of: a) 1.5 point in PHQ-9 depression  
447 score (SD = 4.5, maximum SD reported in patients with breast, colorectal and prostate  
448 cancer;[33] PHQ-9 minimal clinically important difference (MCID) for cancer patients: 2.6 to  
449 5);[34] b) 1.4 point in GAD-7 anxiety score (SD=4.1, maximum SD reported in patients with  
450 breast, colorectal and prostate cancer;[35] MCID=1.95);[33] and mean differences between  
451 group in change from baseline to 9 weeks of: c) 1.2 points in FCRI severity score (SD=3.6,  
452 pilot study effect: 2.6);[6] d) 1.1 points in CAMS-R score (SD=3.4); e) 2.5 points in Worry  
453 score [SD=7.3]; f) 3.0 points in PSS score [SD=8.9]; the last 3 reflecting moderate Cohen's *d*  
454 effect sizes (<0.35).

455

1  
2  
3 456 To meet the sample size needs of our desired statistical power, we will recruit 400 participants.  
4  
5 457 In our pilot study, six participants (13%) withdrew in the intervention group and none in the  
6  
7 458 control group. Assuming a conservative 30% attrition rate at nine months, we expect to have  
8  
9 459 complete data for approximately 280 participants (140 per group).  
10  
11  
12  
13

460

#### 461 **Analysis plan**

16 462 All statistical analysis will be conducted on an intention-to-treat basis whereby all randomised  
17  
18 463 participants with at least one post-baseline measurement will be analysed by original treatment  
19  
20 464 assignment regardless of adherence. Baseline characteristics will be described using summary  
21  
22 465 measures selected based on variable distribution. The main analysis will adjust for baseline  
23  
24 466 values of the outcome and for factors used in the stratified randomisation.[31]  
25  
26  
27

467

30 468 *Aims 1 and 2.* The effect of the intervention on each of the outcomes, defined as change from  
31  
32 469 baseline to nine weeks, will be assessed using linear models including group and the  
33  
34 470 stratification factors. *Aim 3.* The effect of the intervention across the three measurement times  
35  
36 471 will be estimated using linear mixed models, including study group, time (categorical: 9 weeks,  
37  
38 472 9 months) interaction group×time and the stratification factors as fixed effects and participant  
39  
40 473 as a random effect. If there is a positive intervention effect on mental health outcomes,  
41  
42 474 exploratory mediation analyses will be conducted to determine whether improvements are  
43  
44 475 mediated by increases in mindfulness.[36] For outcomes where it is a plausible assumption that  
45  
46 476 missing data are completely at random, we will use complete case analysis; if not plausible, we  
47  
48 477 will use multiple imputation. *Subgroup analysis:* We will explore whether age or gender  
49  
50 478 modify the effect of the intervention on FCR, depression and anxiety at 9 weeks.  
51  
52  
53  
54

479



1  
2  
3 480 *Aim 4.* This study will also comprise a cost-consequences analysis where incremental costs of  
4  
5 481 the intervention will be compared with the full spectrum of outcomes included in the study. A  
6  
7 482 series of cost-effectiveness ratios can be determined which have been shown to be useful for  
8  
9 483 decision-makers. Inclusion of the AQL 4D will also enable a cost-utility analysis to be  
10  
11 484 undertaken, thereby allowing practical judgements to be made regarding value for money  
12  
13 485 credentials of the intervention. Nevertheless, the economic analysis will be primarily from the  
14  
15 486 perspective of the health care sector and a secondary analysis from the broader societal  
16  
17 487 perspective will also be undertaken. A detailed costing of the intervention will be undertaken  
18  
19 488 and the evaluation will first measure and value any change to the use of health care resources  
20  
21 489 over the period of the study between the two arms of the trial and then compare any additional  
22  
23 490 costs to the additional outcomes achieved. Standardised economic evaluation techniques will  
24  
25 491 be used including incremental analysis of mean differences and bootstrapping to determine  
26  
27 492 confidence intervals along with a net monetary analysis to determine the cost-effectiveness of  
28  
29 493 the intervention for different value for money threshold criteria. The costs of routine roll-out  
30  
31 494 will be estimated.  
32  
33  
34  
35  
36  
37  
38  
39

40 496 *MindOnLine* usage data by the intervention group will be reported using descriptive statistics.  
41  
42 497 Linear mixed models, with random intercept and slope for each person, will be fitted to estimate  
43  
44 498 time trends in usage.  
45  
46

#### 47 499 **Data management**

48 500 Data will be exported from Qualtrics on a monthly basis and crossed checked during  
49  
50 501 exportation to ensure accuracy in results. All identifying participant information will be  
51  
52 502 removed from data sets. Documents containing sensitive information will be saved as password  
53  
54 503 protected files and stored within the Deakin University One Drive.  
55  
56  
57

#### 58 504 **Monitoring**

59 505 Data  
60

1  
2  
3 506 The adherence data will be monitored by the program developer. The program developer does  
4  
5 507 not have any competing interests. Other project data will be monitored by the project steering  
6  
7 508 committee with regular meetings and progress updates. No interim analysis will be performed  
8  
9 509 during the trial.

### 510 **Patient and Public Involvement**

511 Representatives from three consumer organisations have been involved in the design and  
512 implementation of the project since its inception. Their contribution has included development  
513 of the intervention and its content, wording on recruitment material, and provided advice on  
514 recruitment strategies. Representatives from each consumer organisation has contributed to  
515 project steering meetings.

### 516 **Ethics and Dissemination**

#### 517 **Harms**

518 All participants will be required to provide written informed consent. In the event that a  
519 participant reports distress to the project manager they will be advised to seek assistance from  
520 the regular medical professionals and provided with additional referrals to lifeline.org.au.  
521 Ethics approval was obtained from the Peter MacCallum Cancer Centre (20-53) and Deakin  
522 University (2020-284). Any adverse events will be reported to the ethics committees.

523

#### 524 **Auditing**

525 The trial may be audited by the governing Human Research Ethics Committees.

#### 526 **Protocol amendments**

527 Protocol amendments will be approved by the governing Human Research Ethics Committees.

528 Any relevant changes will be submitted as a modification to the Australian and New Zealand

529 Clinical Trial Registry.

1  
2  
3 **530 Dissemination**

4  
5 531 The findings of this study will be written by study authors and published in peer reviewed  
6  
7 532 journals project steering committee. All identifying participant information will be removed  
8  
9 533 prior to publication.  
10

11  
12  
13 **534 Discussion**

14  
15  
16 535 One of the most significant changes across society is the use of web-based technology. Online  
17  
18 536 mindfulness-based interventions circumvent problems with traditional face-to-face delivery of  
19  
20 537 the program, impacted by work commitments, caring responsibilities, geographic isolation and  
21  
22 538 pandemics[37, 38].  
23  
24

25  
26 539

27  
28 540 This study will rigorously evaluate the efficacy of a self-directed online mindfulness program  
29  
30 541 in reducing FCR in breast, prostate and CRC survivors. The study will advance the literature  
31  
32 542 regarding the benefits of mindfulness for cancer survivors by representing one of few large  
33  
34 543 well controlled trials of a self-directed mindfulness-based program, involving smartphone  
35  
36 544 technology, aimed at reducing FCR. Including a health economic evaluation of the program  
37  
38 545 adds to the utility of the trial with the study providing information that budget holders and  
39  
40 546 policy makers need when considering recommendations and support for supportive care  
41  
42 547 programs. This trial will fill a gap in knowledge regarding the potential impact of an online  
43  
44 548 mindfulness program in supporting cancer survivors.[7] Extensive pilot work in identifying the  
45  
46 549 type of program cancer survivors are interested in, involving consumers in designing the  
47  
48 550 content and length of the program and providing reminders and practice tips increase the  
49  
50 551 likelihood of participants engaging with the program and the intervention having a positive  
51  
52 552 impact.  
53  
54  
55  
56  
57

58 553  
59  
60

1  
2  
3 554 The study is being conducted in partnership with health services and cancer advocacy groups.  
4  
5 555 As partners in the study, they will ensure the intervention can be rolled out to cancer survivors  
6  
7 556 if shown to be effective. In addition to consumer advocacy groups, the study is being conducted  
8  
9  
10 557 in partnership with government. As we expect the *MindOnLine* intervention to improve health  
11  
12 558 outcomes, reduce the fear and distress in cancer survivorship and reduce health service and  
13  
14 559 community costs our partnership with government will ensure that policy makers are informed  
15  
16  
17 560 of the study's findings particularly cost-effectiveness findings.  
18

19 561

20  
21 562 The study has a number of strengths and weaknesses. Development of the intervention through  
22  
23 563 a review of the literature, input from consumers and findings from a pilot study and  
24  
25 564 involvement of consumer advocacy groups and government are study strengths ensuring  
26  
27 565 translation of the program into practice if shown to be effective. For example, consumer  
28  
29 566 advocacy groups have contributed to the design of the intervention program, recruitment of  
30  
31 567 eligible patients, and will provide advice on the interpretation of results, dissemination and  
32  
33 568 translation. Incorporating an economic evaluation into the study design is a strength as it will  
34  
35 569 complement clinical findings and support decision-making processes for potential  
36  
37 570 implementation.  
38  
39

40 571

41  
42  
43  
44 572 However, several methodological limitations also need to be acknowledged. Recruitment  
45  
46 573 through social media platforms means we cannot accurately assess uptake of the intervention,  
47  
48 574 as we will not be able to identify the number of eligible people exposed to our advertisements.  
49  
50  
51 575 This may limit our ability to determine reach of the program. However, recording the time  
52  
53 576 taken for recruitment and accessing google analytic data on internet traffic and page visits may  
54  
55 577 provide some information in this area. Participants will need access to the internet to  
56  
57 578 participate. While this may mean some people will be excluded from the study, we believe this  
58  
59  
60

1  
2  
3 579 will have minimal impact on the study. We envisage that the study will take approximately 4  
4  
5 580 years to complete. Advances in social platforms, technology and app-based programming can  
6  
7 581 change substantially in a short period. While this may affect the actual online platform used for  
8  
9 582 the program, we do not consider this will influence the program content or delivery  
10  
11 583 mechanisms. As technology advances will likely increase interest in self-directed support  
12  
13 584 programs for cancer survivors, it is essential that cancer survivors access programs with  
14  
15 585 demonstrated effectiveness.  
16  
17  
18  
19  
20

21  
22  
23

24 587 **Trial Registration** ACTRN12620000645954

25 588 **Protocol Version:** Version 5, dated 18 December 2020

26 589 Recruitment commenced 12.10.2020, it is anticipated recruitment will be for a duration of 18  
27  
28 590 months finishing on 12.04.2022.  
29  
30

31 591

### 32 592 **Abbreviations**

33 593 AQL-4D Assessment of Quality of Life – 4 Dimensions

34 594 BCNA Breast Cancer Network Australia

35 595 CAMSR Cognitive and Affective Mindfulness Scale-Revised

36 596 CI Confidence interval

37 597 CRC Colorectal Cancer

38 598 FCR Fear of cancer recurrence

39 599 FCRI Fear of Cancer Recurrence Inventory

40 600 GAD-7 General Anxiety Disorder scale

41 601 MBCT Mindfulness-based cognitive therapy

42 602 MCID Minimally clinically important difference

43 603 PCFA Prostate Cancer Foundation of Australia  
44  
45  
46  
47  
48  
49  
50  
51  
52  
53  
54  
55  
56  
57  
58  
59  
60

1  
2  
3 604 PHQ-9 Patient Health Questionnaire  
4

5 605 QALY Quality of Life Years  
6

7 606 QoL Quality of Life  
8

9  
10 607 RA Research assistant  
11

12 608 RCT Randomized controlled trial  
13

14 609 SD standard deviation  
15  
16  
17

18  
19 **References**  
20

21 611 1. Australian Institute of Health and Welbeing. Australia's health in brief 2020.  
22

23 612 Canberra: AIHW, 2020.  
24

25 613 2. Carlson LE. Mindfulness-based interventions for coping with cancer. *Annals of*  
26  
27  
28 614 *the New York Academy of Sciences* 2016;1373(1):5-12. doi: 10.1111/nyas.13029  
29

30 615 3. Simard S, Thewes B, Humphris G, et al. Fear of cancer recurrence in adult cancer  
31  
32  
33 616 survivors: a systematic review of quantitative studies. *J Cancer Surviv*  
34  
35 617 2013;7(3):300-22. doi: 10.1007/s11764-013-0272-z [published Online First:  
36  
37 618 2013/03/12]  
38

39 619 4. Mitchell A. Pooled Results From 38 Analyses of the Accuracy of Distress  
40  
41  
42 620 Thermometer and Other Ultra-Short Methods of Detecting Cancer-Related Mood  
43  
44 621 Disorders. *Journal of Clinical Oncology* 2007;25(29):4670-81. doi:  
45  
46 622 10.1200/jco.2006.10.0438  
47  
48

49 623 5. Savard J, Ivers H. The evolution of fear of cancer recurrence during the cancer  
50  
51 624 care trajectory and its relationship with cancer characteristics. *Journal of*  
52  
53 625 *Psychosomatic Research* 2013;74(4):354-60. doi:  
54  
55 626 <https://doi.org/10.1016/j.jpsychores.2012.12.013>  
56  
57  
58  
59  
60

- 1  
2  
3 627 6. Russell L, Ugalde A, Orellana L, et al. A pilot randomised controlled trial of an  
4  
5 628 online mindfulness-based program for people diagnosed with melanoma.  
6  
7  
8 629 *Supportive Care in Cancer* 2019;27(7):2735-46. doi: 10.1007/s00520-018-4574-6  
9  
10 630 7. Keng S-L, Smoski MJ, Robins CJ. Effects of mindfulness on psychological  
11  
12 631 health: A review of empirical studies. *Clinical Psychology Review*  
13  
14 632 2011;31(6):1041-56. doi: <https://doi.org/10.1016/j.cpr.2011.04.006>  
15  
16 633 8. Piet J, Wurtzen H, Zachariae R. The effect of mindfulness-based therapy on  
17  
18 634 symptoms of anxiety and depression in adult cancer patients and survivors: a  
19  
20 635 systematic review and meta-analysis. *J Consult Clin Psychol* 2012;80(6):1007-20.  
21  
22 636 doi: 10.1037/a0028329 [published Online First: 2012/05/09]  
23  
24 637 9. Chambers SK, Occhipinti S, Foley E, et al. Mindfulness-Based Cognitive Therapy  
25  
26 638 in Advanced Prostate Cancer: A Randomized Controlled Trial. *Journal of Clinical*  
27  
28 639 *Oncology* 2017;35(3):291-97. doi: 10.1200/jco.2016.68.8788  
29  
30 640 10. Crane RS, Brewer J, Feldman C, et al. What defines mindfulness-based programs?  
31  
32 641 The warp and the weft. *Psychological Medicine* 2017;47(6):990-99. doi:  
33  
34 642 10.1017/S0033291716003317 [published Online First: 2016/12/29]  
35  
36 643 11. van Emmerik AAP, Berings F, Lancee J. Efficacy of a Mindfulness-Based Mobile  
37  
38 644 Application: a Randomized Waiting-List Controlled Trial. *Mindfulness*  
39  
40 645 2018;9(1):187-98. doi: 10.1007/s12671-017-0761-7  
41  
42 646 12. Toivonen KI, Zernicke K, Carlson LE. Web-Based Mindfulness Interventions for  
43  
44 647 People With Physical Health Conditions: Systematic Review. *Journal of Medical*  
45  
46 648 *Internet Research*, 2017. **19**(8): p. e303. doi: 10.2196/jmir.7487  
47  
48 649 13. Compen F, Bisseling E, Schellekens M, et al. Face-to-Face and Internet-Based  
49  
50 650 Mindfulness-Based Cognitive Therapy Compared With Treatment as Usual in  
51  
52 651 Reducing Psychological Distress in Patients With Cancer: A Multicenter  
53  
54  
55  
56  
57  
58  
59  
60

- 1  
2  
3 652 Randomized Controlled Trial. *Journal of Clinical Oncology* 2018;36(23):2413-21.  
4  
5 653 doi: 10.1200/JCO.2017.76.5669  
6  
7  
8 654 14. Zernicke KA, Campbell TS, Specia M, et al. The eCALM Trial: eTherapy for  
9  
10 655 Cancer Applying Mindfulness. Exploratory Analyses of the Associations Between  
11  
12 656 Online Mindfulness-Based Cancer Recovery Participation and Changes in Mood,  
13  
14 657 Stress Symptoms, Mindfulness, Posttraumatic Growth, and Spirituality.  
15  
16 658 Mindfulness, 2016:1071-81.  
17  
18  
19 659 15. Bruggeman-Everts FZ, Wolvers MDJ, van de Schoot R, et al. Effectiveness of  
20  
21 660 Two Web-Based Interventions for Chronic Cancer-Related Fatigue Compared to  
22  
23 661 an Active Control Condition: Results of the “Fitter na kanker” Randomized  
24  
25 662 Controlled Trial. *J Med Internet Res* 2017;19(10):e336. doi: 10.2196/jmir.7180  
26  
27  
28 663 16. Russell L, Ugalde A, Milne D, et al. Digital Characteristics and Dissemination  
29  
30 664 Indicators to Optimize Delivery of Internet-Supported Mindfulness-Based  
31  
32 665 Interventions for People With a Chronic Condition: Systematic Review. *JMIR*  
33  
34 666 *Ment Health* 2018;5(3):e53. doi: 10.2196/mental.9645 [published Online First:  
35  
36 667 2018/08/23]  
37  
38  
39 668 17. Russell L, Orellana L, Ugalde A, et al. Exploring Knowledge, Attitudes, and  
40  
41 669 Practice Associated With Meditation Among Patients With Melanoma. *Integr*  
42  
43 670 *Cancer Ther* 2018;17(2):237-47. doi: 10.1177/1534735417699514 [published  
44  
45 671 Online First: 2017/06/20]  
46  
47  
48 672 18. Sharpe, L., et al., Psychological intervention (ConquerFear) for treating fear of  
49  
50 673 cancer recurrence: mediators and moderators of treatment efficacy. *Journal of*  
51  
52 674 *Cancer Survivorship*, 2019. 13(5): p. 695-702. doi: 10.1007/s11764-019-00788-4  
53  
54  
55  
56  
57  
58  
59  
60



- 1  
2  
3 675 19. Smith AB, Thewes B, Turner J, et al. Pilot of a theoretically grounded  
4  
5 676 psychologist-delivered intervention for fear of cancer recurrence (Conquer Fear).  
6  
7 677 *Psycho-Oncology* 2015(8):967. doi: 10.1002/pon.3775  
8  
9  
10 678 20. Simard S, Savard J. Screening and comorbidity of clinical levels of fear of cancer  
11  
12 679 recurrence. *Journal of Cancer Survivorship* 2015;9(3):481-91. doi:  
13  
14 680 10.1007/s11764-015-0424-4  
15  
16  
17 681 21. Kroenke K, Spitzer RL, Williams JBW. The PHQ-9: validity of a brief depression  
18  
19 682 severity measure. *Journal of General Internal Medicine* 2001;16(9):606-13. doi:  
20  
21 683 10.1046/j.1525-1497.2001.016009606.x  
22  
23  
24 684 22. Löwe B, Decker O, Müller S, et al. Validation and Standardization of the  
25  
26 685 Generalized Anxiety Disorder Screener (GAD-7) in the General Population.  
27  
28 686 *Medical Care* 2008;46(3):266-74. doi: 10.1097/MLR.0b013e318160d093  
29  
30  
31 687 23. Richardson J, Iezzi A, Khan MA, et al. Validity and Reliability of the Assessment  
32  
33 688 of Quality of Life (AQoL)-8D Multi-Attribute Utility Instrument. *The Patient -*  
34  
35 689 *Patient-Centered Outcomes Research* 2014;7(1):85-96. doi: 10.1007/s40271-013-  
36  
37 690 0036-x  
38  
39  
40 691 24. Feldman G, Hayes A, Kumar S, et al. The Development and Initial Validation of  
41  
42 692 the Cognitive and Affective Mindfulness Scale-Revised (CAMS-R). *Journal of*  
43  
44 693 *Psychopathology and Behavioral Assessment* 2006;29(3):177. doi:  
45  
46 694 10.1007/s10862-006-9035-8  
47  
48  
49 695 25. Whitaker C, Stevelink S, Fear N. The Use of Facebook in Recruiting Participants  
50  
51 696 for Health Research Purposes: A Systematic Review. *Journal of medical Internet*  
52  
53 697 *research* 2017;19(8):e290-e90. doi: 10.2196/jmir.7071  
54  
55  
56 698 26. Abraham C, Michie S. A taxonomy of behavior change techniques used in  
57  
58 699 interventions. *Health psychology : official journal of the Division of Health*  
59  
60

- 1  
2  
3 700 *Psychology*, American Psychological Association 2008;27(3):379-87. doi:  
4  
5 701 10.1037/0278-6133.27.3.379 [published Online First: 2008/07/16]  
6  
7  
8 702 27. Andersen BL, DeRubeis RJ, Berman BS, et al. Screening, Assessment, and Care  
9  
10 703 of Anxiety and Depressive Symptoms in Adults With Cancer: An American  
11  
12 704 Society of Clinical Oncology Guideline Adaptation. *Journal of Clinical Oncology*  
13  
14 705 2014;32(15):1605-19. doi: 10.1200/jco.2013.52.4611  
15  
16  
17 706 28. Bergomi C, Tschacher W, Kupper Z. The Assessment of Mindfulness with Self-  
18  
19 707 Report Measures: Existing Scales and Open Issues. *Mindfulness* 2013;4(3):191-  
20  
21 708 202. doi: 10.1007/s12671-012-0110-9  
22  
23  
24 709 29. Kasparian NA, McLoone JK, Butow PN. Psychological Responses and Coping  
25  
26 710 Strategies Among Patients With Malignant Melanoma: A Systematic Review of  
27  
28 711 the Literature. *Archives of Dermatology* 2009;145(12):1415-27. doi:  
29  
30 712 10.1001/archdermatol.2009.308  
31  
32  
33 713 30. Livingston PM, Heckel L, Orellana L, et al. Outcomes of a randomized controlled  
34  
35 714 trial assessing a smartphone Application to reduce unmet needs among people  
36  
37 715 diagnosed with CancEr (ACE). *Cancer Medicine* 2020;9(2):507-16. doi:  
38  
39 716 10.1002/cam4.2718  
40  
41  
42 717 31. Yang L, Tsiatis AA. Efficiency Study of Estimators for a Treatment Effect in a  
43  
44 718 Pretest–Posttest Trial. *The American Statistician* 2001;55(4):314-21. doi:  
45  
46 719 10.1198/000313001753272466  
47  
48  
49 720 32. Butow PN, Turner J, Gilchrist J, et al. Randomized Trial of ConquerFear: A  
50  
51 721 Novel, Theoretically Based Psychosocial Intervention for Fear of Cancer  
52  
53 722 Recurrence. *Journal of Clinical Oncology* 2017;35(36):4066-77. doi:  
54  
55 723 10.1200/jco.2017.73.1257  
56  
57  
58  
59  
60

- 1  
2  
3 724 33. Hartung TJ, Brähler E, Faller H, et al. The risk of being depressed is significantly  
4  
5 725 higher in cancer patients than in the general population: Prevalence and severity of  
6  
7 726 depressive symptoms across major cancer types. *European Journal of Cancer*  
8  
9 727 2017;72:46-53. doi: 10.1016/j.ejca.2016.11.017  
10  
11  
12 728 34. Scott EL, Kroenke K, Wu J, et al. Beneficial Effects of Improvement in  
13  
14 729 Depression, Pain Catastrophizing, and Anxiety on Pain Outcomes: A 12-Month  
15  
16 730 Longitudinal Analysis. *The Journal of Pain* 2016;17(2):215-22. doi:  
17  
18 731 10.1016/j.jpain.2015.10.011  
19  
20  
21 732 35. Faller H, Brähler E, Härter M, et al. Unmet needs for information and  
22  
23 733 psychosocial support in relation to quality of life and emotional distress: A  
24  
25 734 comparison between gynecological and breast cancer patients. *Patient Education*  
26  
27 735 *and Counseling* 2017;100(10):1934-42. doi:  
28  
29 736 <https://doi.org/10.1016/j.pec.2017.05.031>  
30  
31  
32  
33 737 36. Labelle LE, Campbell TS, Carlson LE. Mindfulness-Based Stress Reduction in  
34  
35 738 Oncology: Evaluating Mindfulness and Rumination as Mediators of Change in  
36  
37 739 Depressive Symptoms. *Mindfulness* 2010;1(1):28-40. doi: 10.1007/s12671-010-  
38  
39 740 0005-6  
40  
41  
42 741 37. Simard S, Savard J. Fear of Cancer Recurrence Inventory: Development and  
43  
44 742 initial validation of a multidimensional measure of fear of cancer recurrence.  
45  
46 743 *Supportive care in cancer*. 2008. 17: p. 241-51. DOI:10.1007/s00520-008-0444-y  
47  
48  
49 744 38. Behan C. The benefits of meditation and mindfulness practices during times of  
50  
51 745 crisis such as COVID-19. *Irish journal of psychological medicine*, 2020. 37(4): p.  
52  
53 746 256-258. doi: 10.1017/ipm.2020.38  
54  
55  
56 747  
57  
58  
59  
60

1  
2  
3 748 **Declarations**  
4  
5

6 749 **Author's contributions**  
7

8 750 PML, LR, LO, NW, MJ, AG, DWA, EO, CM, AU, RC, J P-N, DH, MB, BR, KW, MF, ABS,

9 751 KP, MS, DC and VW contributed to the conception of the program or design of the study.  
10

11 752 EO designed the web platform and analytics with input from LR, NW, RC, DWA, AW,  
12

13 753 PML. CM designed the economic component of the study. PML, LR, LO, NW, MJ, AG,  
14

15 754 DWA, EO, CM, AU, RC, J P-N, DH, MB, BR, KW, MF, ABS, KP, SS, AW, KG, MS, DC,  
16

17 755 BP and VW provided substantial input into the development of the protocol or revising it  
18

19 756 critically for important intellectual content. PML, LR, NW, LO and VW drafted the  
20

21 757 manuscript with contributions from MJ, AG, DWA, EO, CM, AU, RC, J P-N, DH, MB, BR,  
22

23 758 KW, MF, ABS, KP, SS, AW, KG, MS, DC, BP.  
24

25 759 Each of the authors contributed to, read and approved the final manuscript.  
26

27 760 Each of the co-authors, PML, LR, LO, NW, MJ, AG, DWA, EO, CM, AU, RC, J P-N, DH,  
28

29 761 MB, BR, KW, MF, ABS, KP, SS, AW, KG, MS, DC, BP and VW, are on the steering  
30

31 762 committee, will oversee implementation of the study and data collection and will contribute  
32

33 763 to the acquisition, analysis or interpretation of the data.  
34

35 764  
36

37 765 **Funding**  
38

39 766 This study is funded by the National Health and Medical Research Council (NHMRC)  
40

41 767 Partnership Grant ID APP1179317. The funder supported the cost of undertaking the project.  
42

43 768 **Competing interests**  
44

45 769 The authors declare they have no competing interests.  
46

47 770  
48

49 771 **Figure Legend/Caption:**  
50

51 772 Figure 1. Study flowchart  
52  
53  
54  
55  
56  
57  
58  
59  
60

1  
2  
3 773  
4  
5  
6 774 FCRI (Fear of Cancer Recurrence Inventory); GAD-7 (General Anxiety and Distress scale;  
7  
8 775 PHQ-9 (Patient Health Questionnaire); CAMS-R (Cognitive and Affective Mindfulness Scale  
9  
10 776 – Revised); AQoL-4D (Assessment of Quality of Life – 4 Dimensions)

11  
12 777  
13

14 778 Figure 2. My Goal functionality in MindOnLine

15  
16  
17 779

18  
19 780 Figure 3. My Journal guided self-reflection practise in MindOnLine.  
20  
21  
22  
23  
24  
25  
26  
27  
28  
29  
30  
31  
32  
33  
34  
35  
36  
37  
38  
39  
40  
41  
42  
43  
44  
45  
46  
47  
48  
49  
50  
51  
52  
53  
54  
55  
56  
57  
58  
59  
60

For peer review only

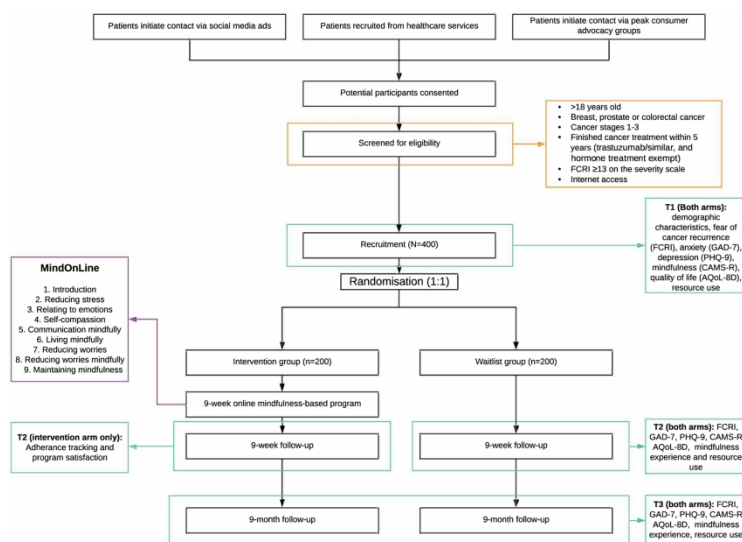

Figure 1. Study flowchart.

338x190mm (400 x 400 DPI)

1  
2  
3  
4  
5  
6  
7  
8  
9  
10  
11  
12  
13  
14  
15  
16  
17  
18  
19  
20  
21  
22  
23  
24  
25  
26  
27  
28  
29  
30  
31  
32  
33  
34  
35  
36  
37  
38  
39  
40  
41  
42  
43  
44  
45  
46  
47  
48  
49  
50  
51  
52  
53  
54  
55  
56  
57  
58  
59  
60

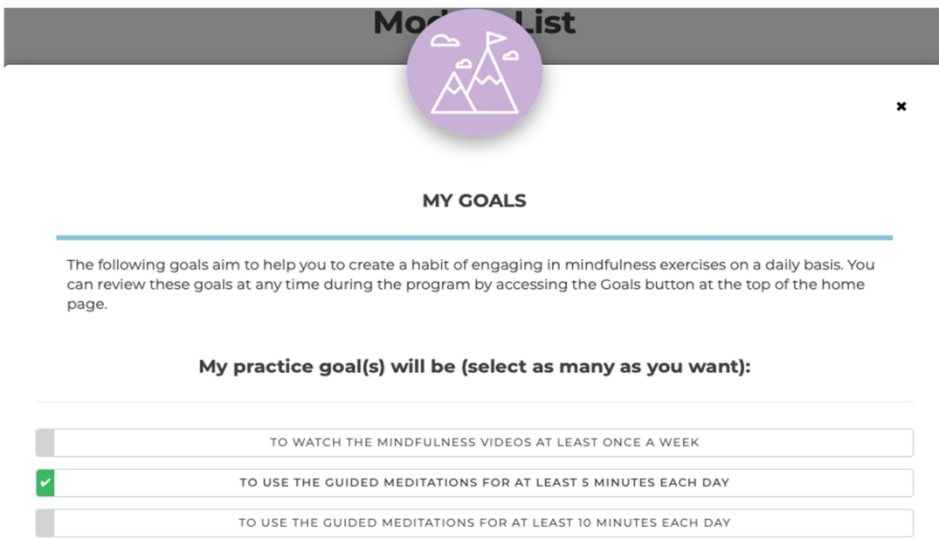

Figure 2. My goal functionality in MondOnLine.

218x120mm (400 x 400 DPI)

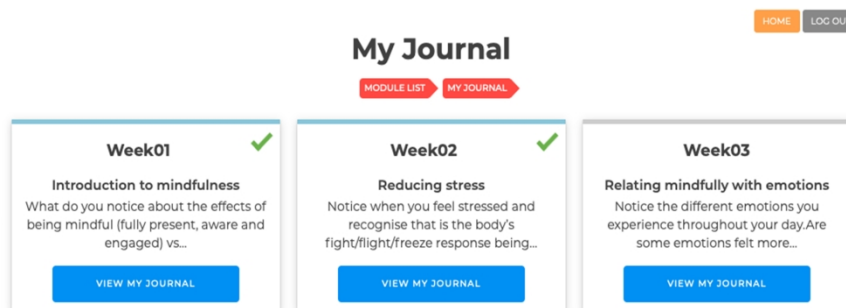

Figure 3. My journal guided self-reflection practice in MindOnline.

308x100mm (400 x 400 DPI)



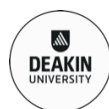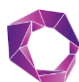

**Peter Mac**  
Peter MacCallum Cancer Centre  
Victoria Australia

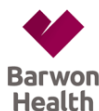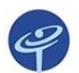

**Epworth**

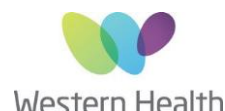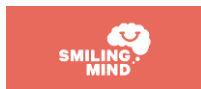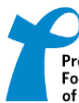

**Prostate Cancer  
Foundation  
of Australia**

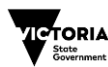

**VICTORIA**  
State Government

Health  
and Human  
Services

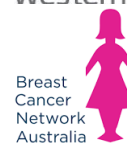

**Breast  
Cancer  
Network  
Australia**

## Participant Information Sheet/Consent Form

|                               |                                                                                     |
|-------------------------------|-------------------------------------------------------------------------------------|
| <b>Title</b>                  | MindOnLine: a mindfulness program for people with breast, bowel or prostate cancer. |
| <b>Short Title</b>            | MindOnLine                                                                          |
| <b>Principal Investigator</b> | Prof Trish Livingston                                                               |
| <b>Location</b>               | Deakin University                                                                   |

### Part 1 What does my participation involve?

#### 1 Introduction

You are invited to take part in this research project, because you have received treatment for breast, prostate or bowel cancer. This research project is testing an online mindfulness-based program for people who have completed their treatment.

This Participant Information Sheet/Consent Form tells you about the research project. It explains the procedures involved. Knowing what is involved will help you decide if you want to take part in the research.

Please read this information carefully. Ask questions about anything that you don't understand or want to know more about. Before deciding whether or not to take part, you might want to talk about it with a relative, friend or healthcare worker.

Participation in this research is voluntary. If you don't wish to take part, you don't have to. You will receive the best possible care whether or not you take part.

If you decide you want to take part in the research project, you will be asked to provide consent online. By agreeing you are telling us that you:

- Understand what you have read
- Consent to take part in the research project
- Consent to have the tests and treatments that are described
- Consent to the use of your personal and health information as described.

#### 2 What is the purpose of this research?

Following treatment for cancer, many people feel anxious and scared about the cancer coming back. This is one of the most common fears of cancer survivors, and it can affect people's ability to enjoy life

1 and plan for the future. In some people, this fear can decrease over time, but most people find that they  
2 worry at certain times. The mindfulness program aims to help cancer survivors to manage their fears  
3 and worries once treatment is completed.  
4

5 Research has shown that mindfulness-based programs can help people cope with anxious thoughts  
6 about their cancer. The internet allows people to use the program from the comfort of their home, and  
7 at their most convenient times. We have tested an online mindfulness program for people who received  
8 treatment for melanoma, with promising results. This research is to find out whether mindfulness can  
9 help people with breast, prostate or bowel cancer.  
10

11 This research is being conducted across healthcare services and cancer organisations and is led by  
12 researchers at the School of Nursing and Midwifery at Deakin University.  
13  
14

15 In this research project we will be testing a mindfulness program among people who meet the following  
16 criteria:  
17

- 18 - People who are over 18 years of age
- 19 - People who speak English well enough to understand videos and surveys presented in English
- 20 - People who have access to a computer or device to receive the program
- 21 - People who received treatment for breast, bowel or prostate cancer
- 22 - People who finished chemotherapy, radiotherapy or surgery treatment within the last five years
- 23 - People who experience a high level of fear of cancer recurrence.  
24

25 You will be asked some questions after providing consent to determine if you meet the eligibility criteria  
26 above. To measure your fear of cancer recurrence you will be asked 9 questions about how your  
27 thoughts and feelings towards cancer may impact on your everyday living.  
28

### 29 **3 What does participation involve?**

30  
31 To participate in this study, each participant will need to have access to a computer, a smartphone, or a  
32 similar tablet device, and internet. If you agree to take part in this project you will be allocated to either  
33 receive the mindfulness program (intervention group) or stay in your usual care (control group). We  
34 need to compare responses from people in these two groups to see if the mindfulness program provides  
35 any benefits to cancer survivors. In order to make sure the groups are the same, participants are put  
36 into one of the two groups by chance (random).  
37  
38

39 If you decide to take part in this study, you will need to provide your consent to participate by accessing  
40 the following website: <https://mindonline.org.au> Before providing your consent you will be asked a  
41 number of questions to make sure you are eligible for the study.  
42  
43

44 After consenting to take part in the study, you will be asked to complete a survey before being randomly  
45 allocated to the intervention or control group. The same survey will be completed again 9 weeks and 9  
46 months later. The survey asks you questions about possible fears of the cancer coming back, how  
47 stressful and worrisome you perceive your life to be, and the type of thoughts you generally focus on.  
48 We will also collect your email address and contact number. Your email and contact number will be used  
49 to send you reminders and other information related to the study.  
50

51 If you are randomised to the mindfulness program, you will receive an email informing you of your  
52 allocation group with instructions on how to access the website. Your participation will involve using the  
53 program for 9 weeks. The program is designed to help you understand and experience potential benefits  
54 of using mindfulness in your day to day life. You will be invited to:  
55

- 56 - Watch short videos at the start of each week. The videos will introduce a new topic about  
57 mindfulness.
- 58 - Practice short meditations twice a day. We will help you create a meditation routine by emailing  
59 you a direct link to guided meditations at times you will have chosen.
- 60 - Apply mindfulness skills in your day-to-day life.

1  
2 If you are assigned to the mindfulness program we will monitor how often the mindfulness program is  
3 used. This will be recorded by your study identification number, and no personal information such as  
4 your Internet Protocol (IP) address linked to your computer or device will be collected.  
5

6 If you are randomised to the control group you will receive an email informing you of your allocation  
7 group and you will continue to receive your usual care from your healthcare providers. You will receive  
8 emails to ask you to complete the questionnaires at 9 weeks and 9 months. After the 9-month survey  
9 you will be able to use the mindfulness program.  
10

11  
12 We will compare the results between those in the mindfulness program and those who are not, to see if  
13 there are any differences in wellbeing between the two groups.  
14

15 There are no additional costs associated with participating in this research project, nor will you be paid.  
16  
17

#### 18 19 **4 Other relevant information about the research project**

20  
21 This study will show if the mindfulness program is helpful for people with breast, prostate or colorectal  
22 cancer. If successful the program we be made open to the wider population.  
23

24 For this study, approximately 400 people will be invited to participate from online and social media  
25 advertisements and from healthcare services.  
26  
27

#### 28 29 **5 Do I have to take part in this research project?**

30  
31 Participation in any research project is voluntary. If you do not wish to take part you don't have to. If  
32 you decide to take part and later change your mind, you are free to withdraw from the project at any  
33 stage.  
34

35 Your decision whether to take part or not to take part, or to take part and then withdraw, will not affect  
36 your relationship with those treating you or involved in your follow-up care, or your relationship with  
37 Deakin University, Breast Cancer Network Australia, or Prostate Cancer Foundation of Australia.  
38  
39

#### 40 41 **6 What are the possible benefits of taking part?**

42  
43 We cannot guarantee or promise that you will receive any benefits from this research; however,  
44 possible benefits for the community may include additional support for people who have completed  
45 treatment for cancer.  
46  
47

#### 48 49 **7 What are the possible risks?**

50  
51 Some people may feel uncomfortable or upset when answering questions in this survey. If you do not  
52 wish to answer a question you may skip it and go to the next question, or you may stop immediately. In  
53 the event that you become upset or distressed as a result of your participation, the researcher can  
54 arrange for counselling or other appropriate support provided by staff who are not members of the  
55 research team. In addition, you may want to contact an external support service such as Lifeline services  
56 on 13 11 14, or [www.mindhealthconnect.org.au](http://www.mindhealthconnect.org.au) or the Cancer Council 13 11 20 telephone service.  
57 If you have any concerns or are unsure whether you should participate in this project, you may wish to  
58 speak to your healthcare professional about your feelings.  
59  
60

## 8 What if I withdraw from this research project?

If you decide to withdraw, please notify a member of the research team about this decision. This notice will ensure that we can remove you from our records and will mean you will not receive any notices about the project.

If you decide to withdraw from the project, we would like to keep the personal and health information about you that has been collected. This is to help us make sure that the results of the research can be measured properly. If you want to withdraw your data from the study as well, please let them know when you tell them about withdrawing from the study.

## 9 What happens when the research project ends?

If you wish to obtain a final copy of the research report describing the results of this study, please contact the project manager (Dr Natalie Heynsbergh on 03 9246 8225, or email [n.heynsbergh@deakin.edu.au](mailto:n.heynsbergh@deakin.edu.au)) and she will arrange for a copy to be sent to you after completion of the study in December 2022.

## Part 2 How is the research project being conducted?

### 10 What will happen to information about me?

Any information obtained in connection with this research project that can identify you (e.g. email address) will remain confidential and will only be used for the purpose of this research project. It will only be disclosed with your permission, except as required by law.

All the information you provide will be coded so you cannot be identified by name, and only the research team will have access to the list that can link your name to your data. All identifying information will be stored in password-protected electronic files or in a locked filing cabinet in the office of the research staff, and will be disposed of as confidential waste after five years.

You will not be identified in any report or publication from this study. Information will be provided in such a way that you cannot be identified.

In accordance with relevant Australian and/or Victorian privacy and other relevant laws, you have the right to access the information collected and stored by the researchers about you. You also have the right to request that any information with which you disagree be corrected. Please contact one of the researchers named in the last section below if you would like to access your information.

### 11 Who is organising and funding the research?

This research project is being managed by Dr Natalie Heynsbergh at Deakin University, and is being funded by a National Health and Medical Research Council (NHMRC) grant.

### 12 Who has reviewed the research project?

All research in Australia involving humans is reviewed by an independent group of people called a Human Research Ethics Committee (HREC). The ethical aspects of this research project have been

1 approved by the Peter MacCallum Human Research Ethics Committee (Reference number 20/53) and  
 2 the Deakin University Human Research Ethics Committee.  
 3

4 This project will be carried out according to the *National Statement on Ethical Conduct in Human*  
 5 *Research (2007)*. This statement has been developed to protect the interests of people who agree to  
 6 participate in human research studies.  
 7

### 10 **13 Further information and who to contact**

11 The person you may need to contact will depend on the nature of your query.  
 12

13 If you want any further information concerning this project or if you have any problems which may be  
 14 related to your involvement in the project, you can contact:  
 15

- 16 • The principal investigator: Prof Patricia Livingston on 03 9244 6609, or email  
 17 [trish.livingston@deakin.edu.au](mailto:trish.livingston@deakin.edu.au)  
 18
- 19 • The project manager: Dr Natalie Heynsbergh on 03 92468225, or email:  
 20 [n.heynsbergh@deakin.edu.au](mailto:n.heynsbergh@deakin.edu.au)  
 21  
 22  
 23  
 24

25 If you have any complaints about any aspect of the project, the way it is being conducted or any  
 26 questions about being a research participant in general, then you may contact:  
 27  
 28

|                             |                                                |
|-----------------------------|------------------------------------------------|
| 29 Reviewing HREC name      | Peter MacCallum Cancer Centre Ethics Committee |
| 30 Project reference number | 20/53                                          |
| 31 HREC Executive Officer   | Ethics Coordinator                             |
| 32 Telephone                | 03 8559 7540                                   |
| 33 Email                    | ethics@petermac.org                            |

### 36 **14 What do I do if I want to participate?**

37 If you would like to participate in this study, please log on to <https://mindonline.org.au>, to answer the  
 38 eligibility questions and provide your consent to participate.  
 39  
 40  
 41  
 42  
 43  
 44  
 45  
 46  
 47  
 48  
 49  
 50  
 51  
 52  
 53  
 54  
 55  
 56  
 57  
 58  
 59  
 60

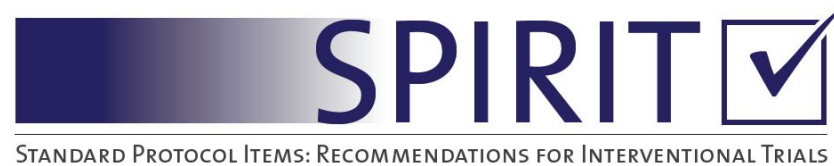

SPIRIT 2013 Checklist: Recommended items to address in a clinical trial protocol and related documents\*

| Section/item                      | Item No | Description                                                                                                                                                                                                                                                                              | Addressed on page number |
|-----------------------------------|---------|------------------------------------------------------------------------------------------------------------------------------------------------------------------------------------------------------------------------------------------------------------------------------------------|--------------------------|
| <b>Administrative information</b> |         |                                                                                                                                                                                                                                                                                          |                          |
| Title                             | 1       | Descriptive title identifying the study design, population, interventions, and, if applicable, trial acronym                                                                                                                                                                             | 1                        |
| Trial registration                | 2a      | Trial identifier and registry name. If not yet registered, name of intended registry                                                                                                                                                                                                     | 2                        |
|                                   | 2b      | All items from the World Health Organization Trial Registration Data Set                                                                                                                                                                                                                 | n/a                      |
| Protocol version                  | 3       | Date and version identifier                                                                                                                                                                                                                                                              | 2                        |
| Funding                           | 4       | Sources and types of financial, material, and other support                                                                                                                                                                                                                              | 23                       |
| Roles and responsibilities        | 5a      | Names, affiliations, and roles of protocol contributors                                                                                                                                                                                                                                  | 1                        |
|                                   | 5b      | Name and contact information for the trial sponsor                                                                                                                                                                                                                                       | 1                        |
|                                   | 5c      | Role of study sponsor and funders, if any, in study design; collection, management, analysis, and interpretation of data; writing of the report; and the decision to submit the report for publication, including whether they will have ultimate authority over any of these activities | 23                       |
|                                   | 5d      | Composition, roles, and responsibilities of the coordinating centre, steering committee, endpoint adjudication committee, data management team, and other individuals or groups overseeing the trial, if applicable (see Item 21a for data monitoring committee)                         | 23                       |

1 **Introduction**

2

3 Background and 6a Description of research question and justification for undertaking the trial, including summary of relevant 3-5  
 4 rationale studies (published and unpublished) examining benefits and harms for each intervention

5

6 6b Explanation for choice of comparators 6

7

8 Objectives 7 Specific objectives or hypotheses 5-6

9

10 Trial design 8 Description of trial design including type of trial (eg, parallel group, crossover, factorial, single group), 6  
 11 allocation ratio, and framework (eg, superiority, equivalence, noninferiority, exploratory)

12

13

14 **Methods: Participants, interventions, and outcomes**

15

16 Study setting 9 Description of study settings (eg, community clinic, academic hospital) and list of countries where data will 6, 8  
 17 be collected. Reference to where list of study sites can be obtained

18

19 Eligibility criteria 10 Inclusion and exclusion criteria for participants. If applicable, eligibility criteria for study centres and 8  
 20 individuals who will perform the interventions (eg, surgeons, psychotherapists)

21

22 Interventions 11a Interventions for each group with sufficient detail to allow replication, including how and when they will be 11-14  
 23 administered

24

25 11b Criteria for discontinuing or modifying allocated interventions for a given trial participant (eg, drug dose n/a  
 26 change in response to harms, participant request, or improving/worsening disease)

27

28 11c Strategies to improve adherence to intervention protocols, and any procedures for monitoring adherence 12-13, 16  
 29 (eg, drug tablet return, laboratory tests)

30

31 11d Relevant concomitant care and interventions that are permitted or prohibited during the trial 16

32

33

34 Outcomes 12 Primary, secondary, and other outcomes, including the specific measurement variable (eg, systolic blood  
 35 pressure), analysis metric (eg, change from baseline, final value, time to event), method of aggregation (eg, 15-17  
 36 median, proportion), and time point for each outcome. Explanation of the clinical relevance of chosen  
 37 efficacy and harm outcomes is strongly recommended

38

39

40 Participant timeline 13 Time schedule of enrolment, interventions (including any run-ins and washouts), assessments, and visits for 14  
 41 participants. A schematic diagram is highly recommended (see Figure)

42

43

44

45

46

|   |             |    |                                                                                                                                                                                       |    |
|---|-------------|----|---------------------------------------------------------------------------------------------------------------------------------------------------------------------------------------|----|
| 1 | Sample size | 14 | Estimated number of participants needed to achieve study objectives and how it was determined, including clinical and statistical assumptions supporting any sample size calculations | 19 |
| 2 |             |    |                                                                                                                                                                                       |    |
| 3 |             |    |                                                                                                                                                                                       |    |
| 4 | Recruitment | 15 | Strategies for achieving adequate participant enrolment to reach target sample size                                                                                                   | 9  |
| 5 |             |    |                                                                                                                                                                                       |    |

## 6 **Methods: Assignment of interventions (for controlled trials)**

### 7 Allocation:

|    |                    |     |                                                                                                                                                                                                                                                                                                                                                          |    |
|----|--------------------|-----|----------------------------------------------------------------------------------------------------------------------------------------------------------------------------------------------------------------------------------------------------------------------------------------------------------------------------------------------------------|----|
| 8  |                    |     |                                                                                                                                                                                                                                                                                                                                                          |    |
| 9  |                    |     |                                                                                                                                                                                                                                                                                                                                                          |    |
| 10 | Sequence           | 16a | Method of generating the allocation sequence (eg, computer-generated random numbers), and list of any factors for stratification. To reduce predictability of a random sequence, details of any planned restriction (eg, blocking) should be provided in a separate document that is unavailable to those who enrol participants or assign interventions | 10 |
| 11 | generation         |     |                                                                                                                                                                                                                                                                                                                                                          |    |
| 12 |                    |     |                                                                                                                                                                                                                                                                                                                                                          |    |
| 13 |                    |     |                                                                                                                                                                                                                                                                                                                                                          |    |
| 14 |                    |     |                                                                                                                                                                                                                                                                                                                                                          |    |
| 15 |                    |     |                                                                                                                                                                                                                                                                                                                                                          |    |
| 16 | Allocation         | 16b | Mechanism of implementing the allocation sequence (eg, central telephone; sequentially numbered, opaque, sealed envelopes), describing any steps to conceal the sequence until interventions are assigned                                                                                                                                                | 10 |
| 17 | concealment        |     |                                                                                                                                                                                                                                                                                                                                                          |    |
| 18 | mechanism          |     |                                                                                                                                                                                                                                                                                                                                                          |    |
| 19 |                    |     |                                                                                                                                                                                                                                                                                                                                                          |    |
| 20 | Implementation     | 16c | Who will generate the allocation sequence, who will enrol participants, and who will assign participants to interventions                                                                                                                                                                                                                                | 10 |
| 21 |                    |     |                                                                                                                                                                                                                                                                                                                                                          |    |
| 22 |                    |     |                                                                                                                                                                                                                                                                                                                                                          |    |
| 23 |                    |     |                                                                                                                                                                                                                                                                                                                                                          |    |
| 24 | Blinding (masking) | 17a | Who will be blinded after assignment to interventions (eg, trial participants, care providers, outcome assessors, data analysts), and how                                                                                                                                                                                                                | 10 |
| 25 |                    |     |                                                                                                                                                                                                                                                                                                                                                          |    |
| 26 |                    |     |                                                                                                                                                                                                                                                                                                                                                          |    |
| 27 |                    | 17b | If blinded, circumstances under which unblinding is permissible, and procedure for revealing a participant's allocated intervention during the trial                                                                                                                                                                                                     | 10 |
| 28 |                    |     |                                                                                                                                                                                                                                                                                                                                                          |    |
| 29 |                    |     |                                                                                                                                                                                                                                                                                                                                                          |    |
| 30 |                    |     |                                                                                                                                                                                                                                                                                                                                                          |    |

## 31 **Methods: Data collection, management, and analysis**

|    |                 |     |                                                                                                                                                                                                                                                                                                                                                                                                              |    |
|----|-----------------|-----|--------------------------------------------------------------------------------------------------------------------------------------------------------------------------------------------------------------------------------------------------------------------------------------------------------------------------------------------------------------------------------------------------------------|----|
| 32 |                 |     |                                                                                                                                                                                                                                                                                                                                                                                                              |    |
| 33 | Data collection | 18a | Plans for assessment and collection of outcome, baseline, and other trial data, including any related processes to promote data quality (eg, duplicate measurements, training of assessors) and a description of study instruments (eg, questionnaires, laboratory tests) along with their reliability and validity, if known. Reference to where data collection forms can be found, if not in the protocol | 14 |
| 34 | methods         |     |                                                                                                                                                                                                                                                                                                                                                                                                              |    |
| 35 |                 |     |                                                                                                                                                                                                                                                                                                                                                                                                              |    |
| 36 |                 |     |                                                                                                                                                                                                                                                                                                                                                                                                              |    |
| 37 |                 |     |                                                                                                                                                                                                                                                                                                                                                                                                              |    |
| 38 |                 | 18b | Plans to promote participant retention and complete follow-up, including list of any outcome data to be collected for participants who discontinue or deviate from intervention protocols                                                                                                                                                                                                                    | 14 |
| 39 |                 |     |                                                                                                                                                                                                                                                                                                                                                                                                              |    |
| 40 |                 |     |                                                                                                                                                                                                                                                                                                                                                                                                              |    |
| 41 |                 |     |                                                                                                                                                                                                                                                                                                                                                                                                              |    |
| 42 |                 |     |                                                                                                                                                                                                                                                                                                                                                                                                              |    |



|    |                                 |     |                                                                                                                                                                                                                                                                                                                                       |    |
|----|---------------------------------|-----|---------------------------------------------------------------------------------------------------------------------------------------------------------------------------------------------------------------------------------------------------------------------------------------------------------------------------------------|----|
| 1  | Data management                 | 19  | Plans for data entry, coding, security, and storage, including any related processes to promote data quality (eg, double data entry; range checks for data values). Reference to where details of data management procedures can be found, if not in the protocol                                                                     | 21 |
| 2  |                                 |     |                                                                                                                                                                                                                                                                                                                                       |    |
| 3  |                                 |     |                                                                                                                                                                                                                                                                                                                                       |    |
| 4  |                                 |     |                                                                                                                                                                                                                                                                                                                                       |    |
| 5  | Statistical methods             | 20a | Statistical methods for analysing primary and secondary outcomes. Reference to where other details of the statistical analysis plan can be found, if not in the protocol                                                                                                                                                              | 19 |
| 6  |                                 |     |                                                                                                                                                                                                                                                                                                                                       |    |
| 7  |                                 |     |                                                                                                                                                                                                                                                                                                                                       |    |
| 8  |                                 | 20b | Methods for any additional analyses (eg, subgroup and adjusted analyses)                                                                                                                                                                                                                                                              | 19 |
| 9  |                                 |     |                                                                                                                                                                                                                                                                                                                                       |    |
| 10 |                                 | 20c | Definition of analysis population relating to protocol non-adherence (eg, as randomised analysis), and any statistical methods to handle missing data (eg, multiple imputation)                                                                                                                                                       | 19 |
| 11 |                                 |     |                                                                                                                                                                                                                                                                                                                                       |    |
| 12 |                                 |     |                                                                                                                                                                                                                                                                                                                                       |    |
| 13 |                                 |     |                                                                                                                                                                                                                                                                                                                                       |    |
| 14 | <b>Methods: Monitoring</b>      |     |                                                                                                                                                                                                                                                                                                                                       |    |
| 15 |                                 |     |                                                                                                                                                                                                                                                                                                                                       |    |
| 16 | Data monitoring                 | 21a | Composition of data monitoring committee (DMC); summary of its role and reporting structure; statement of whether it is independent from the sponsor and competing interests; and reference to where further details about its charter can be found, if not in the protocol. Alternatively, an explanation of why a DMC is not needed | 21 |
| 17 |                                 |     |                                                                                                                                                                                                                                                                                                                                       |    |
| 18 |                                 |     |                                                                                                                                                                                                                                                                                                                                       |    |
| 19 |                                 |     |                                                                                                                                                                                                                                                                                                                                       |    |
| 20 |                                 |     |                                                                                                                                                                                                                                                                                                                                       |    |
| 21 |                                 |     |                                                                                                                                                                                                                                                                                                                                       |    |
| 22 |                                 | 21b | Description of any interim analyses and stopping guidelines, including who will have access to these interim results and make the final decision to terminate the trial                                                                                                                                                               | 21 |
| 23 |                                 |     |                                                                                                                                                                                                                                                                                                                                       |    |
| 24 |                                 |     |                                                                                                                                                                                                                                                                                                                                       |    |
| 25 | Harms                           | 22  | Plans for collecting, assessing, reporting, and managing solicited and spontaneously reported adverse events and other unintended effects of trial interventions or trial conduct                                                                                                                                                     | 21 |
| 26 |                                 |     |                                                                                                                                                                                                                                                                                                                                       |    |
| 27 |                                 |     |                                                                                                                                                                                                                                                                                                                                       |    |
| 28 |                                 |     |                                                                                                                                                                                                                                                                                                                                       |    |
| 29 | Auditing                        | 23  | Frequency and procedures for auditing trial conduct, if any, and whether the process will be independent from investigators and the sponsor                                                                                                                                                                                           | 21 |
| 30 |                                 |     |                                                                                                                                                                                                                                                                                                                                       |    |
| 31 |                                 |     |                                                                                                                                                                                                                                                                                                                                       |    |
| 32 |                                 |     |                                                                                                                                                                                                                                                                                                                                       |    |
| 33 | <b>Ethics and dissemination</b> |     |                                                                                                                                                                                                                                                                                                                                       |    |
| 34 |                                 |     |                                                                                                                                                                                                                                                                                                                                       |    |
| 35 | Research ethics approval        | 24  | Plans for seeking research ethics committee/institutional review board (REC/IRB) approval                                                                                                                                                                                                                                             | 24 |
| 36 |                                 |     |                                                                                                                                                                                                                                                                                                                                       |    |
| 37 |                                 |     |                                                                                                                                                                                                                                                                                                                                       |    |
| 38 | Protocol amendments             | 25  | Plans for communicating important protocol modifications (eg, changes to eligibility criteria, outcomes, analyses) to relevant parties (eg, investigators, REC/IRBs, trial participants, trial registries, journals, regulators)                                                                                                      | 21 |
| 39 |                                 |     |                                                                                                                                                                                                                                                                                                                                       |    |
| 40 |                                 |     |                                                                                                                                                                                                                                                                                                                                       |    |
| 41 |                                 |     |                                                                                                                                                                                                                                                                                                                                       |    |
| 42 |                                 |     |                                                                                                                                                                                                                                                                                                                                       |    |
| 43 |                                 |     |                                                                                                                                                                                                                                                                                                                                       |    |
| 44 |                                 |     |                                                                                                                                                                                                                                                                                                                                       |    |
| 45 |                                 |     |                                                                                                                                                                                                                                                                                                                                       |    |
| 46 |                                 |     |                                                                                                                                                                                                                                                                                                                                       |    |

|    |                               |     |                                                                                                                                                                                                                                                                                     |          |
|----|-------------------------------|-----|-------------------------------------------------------------------------------------------------------------------------------------------------------------------------------------------------------------------------------------------------------------------------------------|----------|
| 1  | Consent or assent             | 26a | Who will obtain informed consent or assent from potential trial participants or authorised surrogates, and how (see Item 32)                                                                                                                                                        | 10       |
| 2  |                               |     |                                                                                                                                                                                                                                                                                     |          |
| 3  |                               |     |                                                                                                                                                                                                                                                                                     |          |
| 4  |                               | 26b | Additional consent provisions for collection and use of participant data and biological specimens in ancillary studies, if applicable                                                                                                                                               | n/a      |
| 5  |                               |     |                                                                                                                                                                                                                                                                                     |          |
| 6  |                               |     |                                                                                                                                                                                                                                                                                     |          |
| 7  | Confidentiality               | 27  | How personal information about potential and enrolled participants will be collected, shared, and maintained in order to protect confidentiality before, during, and after the trial                                                                                                | 21       |
| 8  |                               |     |                                                                                                                                                                                                                                                                                     |          |
| 9  |                               |     |                                                                                                                                                                                                                                                                                     |          |
| 10 | Declaration of interests      | 28  | Financial and other competing interests for principal investigators for the overall trial and each study site                                                                                                                                                                       | 24       |
| 11 |                               |     |                                                                                                                                                                                                                                                                                     |          |
| 12 |                               |     |                                                                                                                                                                                                                                                                                     |          |
| 13 | Access to data                | 29  | Statement of who will have access to the final trial dataset, and disclosure of contractual agreements that limit such access for investigators                                                                                                                                     | 21       |
| 14 |                               |     |                                                                                                                                                                                                                                                                                     |          |
| 15 |                               |     |                                                                                                                                                                                                                                                                                     |          |
| 16 | Ancillary and post-trial care | 30  | Provisions, if any, for ancillary and post-trial care, and for compensation to those who suffer harm from trial participation                                                                                                                                                       | 21       |
| 17 |                               |     |                                                                                                                                                                                                                                                                                     |          |
| 18 |                               |     |                                                                                                                                                                                                                                                                                     |          |
| 19 |                               |     |                                                                                                                                                                                                                                                                                     |          |
| 20 | Dissemination policy          | 31a | Plans for investigators and sponsor to communicate trial results to participants, healthcare professionals, the public, and other relevant groups (eg, via publication, reporting in results databases, or other data sharing arrangements), including any publication restrictions | 21       |
| 21 |                               |     |                                                                                                                                                                                                                                                                                     |          |
| 22 |                               |     |                                                                                                                                                                                                                                                                                     |          |
| 23 |                               |     |                                                                                                                                                                                                                                                                                     |          |
| 24 |                               | 31b | Authorship eligibility guidelines and any intended use of professional writers                                                                                                                                                                                                      | 21       |
| 25 |                               |     |                                                                                                                                                                                                                                                                                     |          |
| 26 |                               | 31c | Plans, if any, for granting public access to the full protocol, participant-level dataset, and statistical code                                                                                                                                                                     | 21       |
| 27 |                               |     |                                                                                                                                                                                                                                                                                     |          |
| 28 |                               |     |                                                                                                                                                                                                                                                                                     |          |
| 29 | <b>Appendices</b>             |     |                                                                                                                                                                                                                                                                                     |          |
| 30 |                               |     |                                                                                                                                                                                                                                                                                     |          |
| 31 | Informed consent materials    | 32  | Model consent form and other related documentation given to participants and authorised surrogates                                                                                                                                                                                  | attached |
| 32 |                               |     |                                                                                                                                                                                                                                                                                     |          |
| 33 |                               |     |                                                                                                                                                                                                                                                                                     |          |
| 34 | Biological specimens          | 33  | Plans for collection, laboratory evaluation, and storage of biological specimens for genetic or molecular analysis in the current trial and for future use in ancillary studies, if applicable                                                                                      | n/a      |
| 35 |                               |     |                                                                                                                                                                                                                                                                                     |          |
| 36 |                               |     |                                                                                                                                                                                                                                                                                     |          |

\*It is strongly recommended that this checklist be read in conjunction with the SPIRIT 2013 Explanation & Elaboration for important clarification on the items. Amendments to the protocol should be tracked and dated. The SPIRIT checklist is copyrighted by the SPIRIT Group under the Creative Commons [“Attribution-NonCommercial-NoDerivs 3.0 Unported”](https://creativecommons.org/licenses/by-nc-nd/3.0/) license.

# BMJ Open

## Efficacy and cost-effectiveness of an online mindfulness program (MindOnLine) to reduce fear of recurrence among people with cancer: study protocol for a randomized controlled trial

|                               |                                                                                                                                                                                                                                                                                                                                                                                                                                                                                                                                                                                                                                                                                                                                                                                                                                                                                                                                                                                                                                                                                                                                                                                                                                                                                                                                                                                                                                                                                                                                                                                                                                                                                                                                                                                                                                                                                                                                                                                                                                                                                                                                                                                                                                                             |
|-------------------------------|-------------------------------------------------------------------------------------------------------------------------------------------------------------------------------------------------------------------------------------------------------------------------------------------------------------------------------------------------------------------------------------------------------------------------------------------------------------------------------------------------------------------------------------------------------------------------------------------------------------------------------------------------------------------------------------------------------------------------------------------------------------------------------------------------------------------------------------------------------------------------------------------------------------------------------------------------------------------------------------------------------------------------------------------------------------------------------------------------------------------------------------------------------------------------------------------------------------------------------------------------------------------------------------------------------------------------------------------------------------------------------------------------------------------------------------------------------------------------------------------------------------------------------------------------------------------------------------------------------------------------------------------------------------------------------------------------------------------------------------------------------------------------------------------------------------------------------------------------------------------------------------------------------------------------------------------------------------------------------------------------------------------------------------------------------------------------------------------------------------------------------------------------------------------------------------------------------------------------------------------------------------|
| Journal:                      | <i>BMJ Open</i>                                                                                                                                                                                                                                                                                                                                                                                                                                                                                                                                                                                                                                                                                                                                                                                                                                                                                                                                                                                                                                                                                                                                                                                                                                                                                                                                                                                                                                                                                                                                                                                                                                                                                                                                                                                                                                                                                                                                                                                                                                                                                                                                                                                                                                             |
| Manuscript ID                 | bmjopen-2021-057212.R2                                                                                                                                                                                                                                                                                                                                                                                                                                                                                                                                                                                                                                                                                                                                                                                                                                                                                                                                                                                                                                                                                                                                                                                                                                                                                                                                                                                                                                                                                                                                                                                                                                                                                                                                                                                                                                                                                                                                                                                                                                                                                                                                                                                                                                      |
| Article Type:                 | Protocol                                                                                                                                                                                                                                                                                                                                                                                                                                                                                                                                                                                                                                                                                                                                                                                                                                                                                                                                                                                                                                                                                                                                                                                                                                                                                                                                                                                                                                                                                                                                                                                                                                                                                                                                                                                                                                                                                                                                                                                                                                                                                                                                                                                                                                                    |
| Date Submitted by the Author: | 07-Dec-2021                                                                                                                                                                                                                                                                                                                                                                                                                                                                                                                                                                                                                                                                                                                                                                                                                                                                                                                                                                                                                                                                                                                                                                                                                                                                                                                                                                                                                                                                                                                                                                                                                                                                                                                                                                                                                                                                                                                                                                                                                                                                                                                                                                                                                                                 |
| Complete List of Authors:     | <p>Livingston, Patricia; Deakin University, Centre for Quality and Patient Safety Research in the Institute for Health Transformation; Deakin University, Faculty of Health</p> <p>Russell, Lahiru; Deakin University, Centre for Quality and Patient Safety Research in the Institute for Health Transformation</p> <p>Orellana, Liliana; Deakin University, Biostatistics Unit, Faculty of Health</p> <p>Winter, Natalie; Deakin University, Centre for Quality and Patient Safety Research in the Institute for Health Transformation</p> <p>Jefford, Michael; Peter MacCallum Cancer Centre, Medical Oncology</p> <p>Girgis, Afaf; Ingham Institute for Applied Medical Research, University of New South Wales, Centre for Oncology Education and Research Translation (CONCERT)</p> <p>Austin, David ; Deakin University Faculty of Health</p> <p>O, Eric; Deakin University Faculty of Health</p> <p>Mihalopoulos, Cathrine; Deakin University Faculty of Health, School of Health and Social Development</p> <p>Ugalde, Anna; Deakin University, Centre for Quality and Patient Safety Research in the Institute for Health Transformation</p> <p>Chambers, Richard; Monash University</p> <p>Phipps-Nelson, Jo; Peter MacCallum Cancer Centre</p> <p>Heath , Dishan; Western Health</p> <p>Botti, Mari; Deakin University, Centre for Quality and Patient Safety Research in the Institute for Health Transformation; Epworth HealthCare</p> <p>Rasmussen, Bodil; Deakin University, Centre for Quality and Patient Safety Research in the Institute for Health Transformation; Western Health</p> <p>Whitfield, Kathryn; Department of Health, Cancer Support Treatment and Research Unit; Community Based Health Services; Commissioning and System Improvement</p> <p>Ftanou, Maria; Peter MacCallum Cancer Centre, Psychosocial Oncology Department</p> <p>Smith, Allan; Ingham Institute for Applied Medical Research, University of New South Wales, Centre for Oncology Education and Research Translation (CONCERT)</p> <p>Pilatti, Kirsten; Breast Cancer Network Australia</p> <p>Sara, Sally; Prostate Cancer Foundation of Australia, Nursing Programs</p> <p>Wootten, Addie; Smiling Mind</p> <p>Gillan, Kate; Epworth HealthCare</p> |

|                                    |                                                                                                                                                                                                                                                                                                                         |
|------------------------------------|-------------------------------------------------------------------------------------------------------------------------------------------------------------------------------------------------------------------------------------------------------------------------------------------------------------------------|
|                                    | Singh, Madhu; Andrew Love Cancer Centre, Barwon Health, University Hospital<br>Campbell, David; Andrew Love Cancer Centre, Barwon Health, University Hospital<br>Pillay, Brindha; Peter MacCallum Cancer Centre, Department of Clinical Psychology<br>White, Vicki ; Deakin University School of Psychology, Psychology |
| <b>Primary Subject Heading</b> :   | Oncology                                                                                                                                                                                                                                                                                                                |
| <b>Secondary Subject Heading</b> : | Communication, Mental health, Public health                                                                                                                                                                                                                                                                             |
| <b>Keywords</b> :                  | ONCOLOGY, Health economics < HEALTH SERVICES ADMINISTRATION & MANAGEMENT, World Wide Web technology < BIOTECHNOLOGY & BIOINFORMATICS                                                                                                                                                                                    |
|                                    |                                                                                                                                                                                                                                                                                                                         |

SCHOLARONE™  
Manuscripts

1  
2  
3  
4  
5 **1 Title**

6  
7  
8 2 Efficacy and cost-effectiveness of an online mindfulness program (MindOnLine) to reduce  
9 3 fear of recurrence among people with cancer: study protocol for a randomized controlled trial  
10 4

11 **5 Authors**

12 6 Livingston PM\*<sup>1,2</sup>, Russell L<sup>1</sup>, Orellana L<sup>3</sup>, Winter N<sup>1</sup>, Jefford M<sup>5</sup>, Girgis A<sup>5</sup>, Austin DW<sup>2</sup>,  
13 7 Eric O<sup>2</sup>, Mihalopoulos C<sup>6</sup>, Ugalde A<sup>1</sup>, Chambers R<sup>7</sup>, Phipps-Nelson J<sup>4</sup>, Herath D<sup>8</sup>, Botti M<sup>1,9</sup>,  
14 8 Rasmussen B<sup>1,8</sup>, Whitfield K<sup>10</sup>, Ftanou M<sup>4</sup>, Smith AB<sup>5</sup>, Pilatti K<sup>11</sup>, Sara S<sup>12</sup>, Wootten A<sup>13</sup>,  
15 9 Gillan K<sup>9</sup>, Singh M<sup>14</sup>, Campbell D<sup>14</sup>, Pillay B<sup>5</sup>, White V<sup>15</sup>  
16  
17  
18  
19

20 11 <sup>1</sup>Centre for Quality and Patient Safety Research in the Institute for Health Transformation; 1  
21 12 Gheringhap St, Geelong, Victoria, 3220, Australia.

22 13 <sup>2</sup>Faculty of Health, Deakin University, Geelong, Vic, Australia

23 14 <sup>3</sup>Biostatistics Unit, Faculty of Health, Deakin University, Geelong, Vic, Australia

24 15 <sup>4</sup>Peter MacCallum Cancer Centre, Melbourne, Vic, Australia

25 16 <sup>5</sup>Centre for Oncology Education and Research Translation (CONCERT), Ingham Institute for  
26 17 Applied Medical Research, South Western Sydney Clinical School, University of New South  
27 18 Wales, NSW, Australia

28 19 <sup>6</sup>School of Health and Social development, Faculty of Health, Deakin University, Geelong,  
29 20 Vic, Australia

30 21 <sup>7</sup>Monash University, Melbourne, Australia

31 22 <sup>8</sup>Western Health, Melbourne, Vic, Australia

32 23 <sup>9</sup>Epworth HealthCare, Melbourne, Vic, Australia

33 24 <sup>10</sup>Cancer Specialty Programs, Medical Research and International Health, Department of  
34 25 Health and Human Services, Melbourne, Vic, Australia

35 26 <sup>11</sup>Breast Cancer Network Australia, Melbourne, Vic, Australia

36 27 <sup>12</sup>Prostate Cancer Foundation Australia, Melbourne, Vic, Australia

37 28 <sup>13</sup>Smiling Mind

38 29 <sup>14</sup>Andrew Love Cancer Centre, Barwon Health, University Hospital, Geelong, Vic, Australia

39 30 <sup>15</sup>School of Psychology, Faculty of Health, Deakin University, Geelong, Vic, Australia

40 31 \*Corresponding Author: Patricia Livingston, Centre for Quality and Patient Safety Research  
41 32 in the Institute for Health Transformation, 1 Gheringhap St, Geelong, Victoria Australia,  
42 33 Faculty of Health, Deakin University, Geelong, Vic, Australia. Email:  
43 34 trish.livingston@deakin.edu.au  
44  
45  
46  
47  
48  
49  
50  
51  
52  
53  
54  
55  
56  
57  
58  
59  
60

## 35 **Abstract**

36 **Introduction:** Fear of cancer recurrence (FCR) is a common condition among cancer survivors  
37 that can lead to significant levels of distress, anxiety and depression. Online mindfulness  
38 programs may provide the mechanism to support cancer survivors manage FCR and distress,  
39 and improve people's wellbeing over the short, medium and long term. The primary aim of  
40 this study is to determine the potential efficacy of MindOnLine, a 9 session mindfulness-based  
41 program for survivors of breast, prostate and colorectal cancer. A formal economic program  
42 will also be conducted.

43 **Methods and analysis:** A single-blind randomized controlled trial to determine the efficacy  
44 and cost-efficacy of a MindOnLine program for cancer survivors. A total of 400 people living  
45 with cancer will be recruited via online advertisements on social media platforms, peak  
46 consumer advocacy groups, or through outpatient services at healthcare providers across  
47 Victoria Australia. People will be randomly allocated to either the MindOnLine program  
48 (n=200) or waitlist control (n=200). Participant assessments will occur at baseline, at 9 weeks  
49 and 9-month follow up. The primary outcome is change in Fear of Recurrence Index Score  
50 total score between baseline and 9 weeks; secondary outcomes are changes in depression and  
51 anxiety, quality of life and mindfulness. The economic analysis comprises a cost-consequences  
52 analysis where all outcomes will be compared to costs.

53 **Ethics and dissemination:** Ethics approval was obtained from the Peter MacCallum Cancer  
54 Centre (20-53) and Deakin University (2020-284). All participants will be required to provide  
55 written informed consent. Findings will be disseminated in peer reviewed journals and among  
56 key stakeholder organisations including hospitals, cancer and community organisations and  
57 Government. If successful the project will be rolled out nationally with a formal  
58 implementation plan.

1  
2  
3 59 **Australian New Zealand Clinical Trials Registry:** 12620000645954. Registered 06 June  
4  
5 60 2020,

6  
7  
8 61 <https://www.anzctr.org.au/Trial/Registration/TrialReview.aspx?id=379520&isReview=true>

9  
10 62 **Keywords:** mindfulness, cancer, fear of cancer recurrence, online; economics of cancer;  
11  
12 63 supportive care; web-based platforms

## 16 64 **Article Summary**

### 19 65 **Strengths and limitations of this study**

- 21 66 • Strengths of our randomised controlled trial include the assessment of both the efficacy and  
22  
23 67 cost-effectiveness of the MindOnLine program, and the involvement of consumer advocacy  
24  
25 68 groups to support recruitment, interpretation of results, dissemination, and translation.
- 26  
27 69 • Incorporating an economic evaluation into the study design will complement clinical findings  
28  
29 70 and support decision-making processes for potential scaling.
- 30  
31 71 • Advances in social platforms, smartphone technology and web-based programming can  
32  
33 72 change substantially in a short period and, while this may affect the actual online platform  
34  
35 73 used, measures are in place to maintain the same intervention during the study period, so we  
36  
37 74 do not believe that this will influence the program content or delivery mechanisms.
- 38  
39 75 • Recruitment primarily through social media platforms means we cannot accurately assess  
40  
41 76 reach of the intervention, as we will not be able to identify the number of eligible people  
42  
43 77 exposed to our advertisements.
- 44  
45 78 • Participants will need access to the internet, which will result in some people unable to take  
46  
47 79 part in the study.

## 80 Introduction

81 Over one million Australians are cancer survivors, and this population is expected to grow  
82 substantially due to an ageing population and improved community-based screening programs  
83 and treatments.[1] A cancer diagnosis can cause people to confront their own mortality, often  
84 for the first time,[2] so it may be unsurprising that three quarters of cancer survivors experience  
85 fear of cancer recurrence (FCR) and 49% report moderate to high levels of fear,[3] as well as  
86 high levels of clinical depression [3] and anxiety.[4]

87  
88 FCR is a highly prevalent and persistent condition that can result in significant levels of anxiety  
89 and depression across the disease trajectory.[5] It is imperative to address this issue and our  
90 recent work into early psychosocial support indicates it may be possible to significantly reduce  
91 FCR through an online mindfulness program.[6] Mindfulness is a state of mind in which one  
92 pays attention to the present experience in a nonjudgmental, curious, and accepting way. Some  
93 studies have shown mindfulness is associated with improved mental health outcomes and  
94 management of the emotional consequences of cancer, [7, 8] while other have found no  
95 effect.[9]

96  
97 Mindfulness-based interventions consist of regular informal and formal mindfulness  
98 meditation practices and are supported by educational principles that are person and  
99 relationship-centred.[10] Research into the use of mindfulness has mostly evaluated face-to-  
100 face programs which are time-intensive, of limited accessibility and costly.[11] Online  
101 mindfulness programs represent a potentially cost-effective mechanism to help people with  
102 physical health conditions.[12] For cancer survivors, there is evidence that online mindfulness  
103 programs may help manage FCR and distress, and improve mental wellbeing over the short,  
104 medium and long term.[2]



1  
2  
3 105 There is also some evidence that online mindfulness-based cognitive therapy (MBCT) can  
4  
5 106 improve psychological outcomes. A recent study compared an online program to face-to-face  
6  
7 107 MBCT which showed improved outcomes [13], however, the sample comprised of mainly  
8  
9 108 breast cancer survivors and it is unclear whether the program would assist with other cancer  
10  
11 109 types[13]. Although this intervention was found to be as effective as a face-to-face MBCT in  
12  
13 110 reducing psychological distress and FCR in cancer patients, [13], there is a lack of robust  
14  
15 111 evidence assessing the effectiveness of a general online mindfulness program for cancer  
16  
17 112 survivors, limiting capacity for implementation and dissemination.[14, 15]  
18  
19  
20  
21  
22  
23

24 114 The aim of this study is to conduct a randomised controlled trial of *MindOnLine*, an online 9  
25  
26 115 session mindfulness-based intervention, for survivors of breast, prostate and colorectal cancer,  
27  
28 116 the most common solid tumours among men and women in Australia, [1] to determine the  
29  
30 117 effectiveness and cost-effectiveness of the program.  
31  
32

### 33 118 *Preliminary work*

35 119 To inform the development of *MindOnLine*, we undertook a systematic review of  
36  
37 120 methodologies for internet based mindfulness interventions.[16] This review showed a dearth  
38  
39 121 of studies with long-term follow up periods. Our team also conducted an exploratory study on  
40  
41 122 the knowledge of, attitudes toward and behaviours regarding meditation among patients with  
42  
43 123 melanoma.[17] Our study of 291 cancer survivors recruited at a single tertiary cancer hospital  
44  
45 124 found that a key barrier to engaging with meditation was a lack of knowledge about its practice.  
46  
47 125 Findings also indicated interest in an online meditation-based intervention once informed about  
48  
49 126 possible benefits of meditation for people with cancer. Those interested in an online  
50  
51 127 meditation-based program reported higher perceived stress, indicating a need for such a  
52  
53 128 program.  
54  
55  
56  
57  
58  
59  
60

1  
2  
3 130 MindOnline was initially developed as a 6-week online mindfulness-based intervention and  
4  
5 131 follows the Framework for mindfulness-based program described by Crane and colleagues.  
6  
7 132 [10] The program promoted awareness and acceptance of thoughts and emotions, and  
8  
9 133 empowered participants to address their distressing thoughts and emotions in more adaptive  
10  
11 134 ways. Through this action, participants learn to manage anxious and depressive moods. These  
12  
13 135 moods are triggered by unhelpful and intrusive thoughts, which are strongly associated with  
14  
15 136 moderate to high levels of fear of cancer recurrence. [18] A pilot study was conducted to assess  
16  
17 137 the potential impact of a 6-week mindfulness program and explore whether the intervention  
18  
19 138 impacted on FCR, worry, and perceived stress compared to usual care. Details of the pilot study  
20  
21 139 are published elsewhere.[6] Briefly, 69 melanoma survivors agreed to participate, and 46  
22  
23 140 participants were randomised into the intervention group (2:1). Scores on all FCR Inventory  
24  
25 141 (FCRI) subscales reduced in the intervention group, with the severity subscale decreasing  
26  
27 142 significantly compared to the control group (-2.6, 95% CI=(-4.4, -0.7); p=0.008) after 6 weeks.  
28  
29 143 The total FCRI score also showed a decrease albeit non-significant (-6.2, 95% CI=(-13.12,  
30  
31 144 0.68), p=0.07). Previous studies have indicated that a 4.1 point decrease on the severity scale  
32  
33 145 is a clinically important change. [19]  
34  
35 146 Based on participant feedback from the pilot study [6] regarding the benefits of mindfulness  
36  
37 147 practice and the suggestion of a maintenance period to enhance sustainability of the effects,  
38  
39 148 *MindOnLine* was expanded to a 9-week program with the last 3 weeks revisiting concepts  
40  
41 149 already explored in the program and supporting regular practice. The structure of MindOnLine  
42  
43 150 reflects the Mindfulness Based Stress Reduction (MBSR) approach by incorporating  
44  
45 151 characteristics typical of mindfulness-based programs, namely educational component, and  
46  
47 152 formal and informal mindfulness practices. Keeping in line with Crane et al's., [10] Framework  
48  
49 153 for adaptation of mindfulness-based programs, MindOnLine adapted the delivery of the  
50  
51 154 program to an online version to facilitate access and convenience of use.  
52  
53  
54  
55  
56  
57  
58  
59  
60

## 155 **Methods and analysis**

### 156 **Aims and Hypotheses**

157 The aims of this study are to determine the effect of *MindOnLine* on FCR, anxiety and  
158 depression in cancer survivors. The specific aims are:

159 **Aim 1:** To evaluate the impact of the *MindOnLine* intervention on the primary outcome (FCR),  
160 measured using the FCRI total score [20] at the end of the 9-week intervention period.

161 *HYPOTHESIS 1:* Participants receiving the intervention will report lower average FCRI total  
162 scores at 9 weeks, compared to the waitlist group.

163 **Aim 2:** To evaluate the impact of *MindOnLine* on secondary outcomes at nine weeks: 1)  
164 Anxiety and Depression, using the Patient Health Questionnaire (PHQ-9)[21]and Generalised  
165 Anxiety Disorder (GAD-7) Scale;[22]2) Quality of Life (QoL) measured by AQOL-  
166 4D;[23]and 3) Mindfulness, using Cognitive and Affective Mindfulness Scale-Revised  
167 (CAMS-R).[24]*HYPOTHESIS 2:* Compared to the waitlist group, participants in the  
168 intervention group will report improvement in all of the secondary outcomes at nine weeks.

169 **Aim 3:** To assess To assess if the effect of the intervention on the primary and secondary  
170 outcomes, relative to usual care, are sustained at the nine-month follow-up. are sustained at the  
171 nine-month follow-up. *HYPOTHESIS 3:* Compared to the waitlist group, participants in the  
172 intervention group will report sustained improvement in primary and secondary outcomes at  
173 nine months.

174 **Aim 4:** To assess, from a health sector and broader societal perspective, the cost-effectiveness  
175 of *MindOnLine*. *HYPOTHESIS 4:* Compared to the waitlist group, *MindOnLine* will be cost-  
176 effective with an incremental cost-effectiveness ratio likely to fall below the commonly used  
177 threshold of \$28,000 - \$50,000/Quality of Life Year (QALY).

178

## 179 **Study Design**

180 This study is a randomised controlled trial, to test the effectiveness and cost-effectiveness of  
181 MindOnLine compared to usual care on FCR, anxiety, depression and QoL among people  
182 diagnosed with breast, prostate or colorectal cancer. Overall, 400 patients will be recruited with  
183 200 patients randomly allocated to the intervention group and 200 to the waitlist group (usual  
184 care only). The intervention group will receive usual care and the online mindfulness program.  
185 Primary and secondary outcomes will be collected at baseline, nine weeks and nine months  
186 post randomisation. Nine months corresponds to approximately six months following the end  
187 of the intervention period. Following completion of the study (9 months), participants in the  
188 waitlist group will be offered the *MindOnLine* intervention (Figure 1).

## 190 **Participants**

191 People with a diagnosis of breast, prostate or colorectal cancer will be recruited via online  
192 advertisements on social media platforms, peak consumer advocacy groups for each cancer  
193 Breast Cancer Network Australia (BCNA), or Prostate Cancer Foundation Australia (PCFA),  
194 Bowel Cancer Australia social media platforms and colorectal cancer support groups, or  
195 through outpatient services at healthcare providers across Victoria, see Figure 1.

1  
2  
3 196 **Figure 1.** Study flowchart  
4

5 197  
6

7 198  
8

9 199  
10

11 200  
12

13 201  
14

15 202  
16

(Insert Figure 1 here)

17 203  
18

19 204  
20

21 205  
22

23 206  
24

25 207  
26

27 208  
28

29 209  
30

31 210

FCRI (Fear of Cancer Recurrence Inventory); GAD-7 (General Anxiety and Distress scale; PHQ-9 (Patient Health Questionnaire); CAMS-R

32 211

(Cognitive and Affective Mindfulness Scale – Revised); AQoL-4D (Assessment of Quality of Life – 4 Dimensions)

1  
2  
3 212 **Inclusion criteria**  
4

5 213 Adults, aged 18 year of older, living in Australia, who completed active treatment for Stage  
6  
7 214 1-3 breast, prostate or colorectal cancer (CRC), (trastuzumab/similar, and hormone treatment  
8  
9 215 exempt) within the past 5 years and have no evidence of disease; have internet access and a  
10  
11 216 FCRI severity score  $\geq 13$ , indicating clinically significant FCR.[19] Our pilot study showed  
12  
13  
14 217 74% of participants with melanoma were identified as having clinically significant FCR. [6]  
15

16  
17 218

18  
19 219 **Exclusion criteria**  
20

21 220 Insufficient English language skills to understand videos presented in English, complete  
22  
23 221 surveys in English or living with advanced cancer (Stage IV disease with less than a 12 month  
24  
25 222 prognosis of survival).  
26

27  
28 223

29 224 **Recruitment procedures**  
30

31 225 Multiple methods will be applied to recruit people to the study:

32  
33 226 1) online through *MindOnLine* social media pages including Facebook, Instagram, Twitter,  
34

35 227 Reddit and LinkedIn  
36

37 228 2) sharing recruitment flyers through BCNA and PCFA social media platforms, and Australian  
38

39 229 based cancer groups  
40

41  
42 230 3) email invitations sent to BCNA and PCFA supporters (and colorectal cancer support groups)  
43

44 231 and cancer registries  
45

46 232 4) paid Facebook and Instagram advertising  
47

48 233 5) through outpatient clinics, chemotherapy and radiotherapy units and rooms of oncologists  
49

50 234 and surgeons at cancer treatment centres.  
51

52  
53 235 **Online recruitment procedure**  
54

55 236 1) The *MindOnLine* social media pages will be shared among social networks and will allow  
56

57 237 people to post questions about the project. 2) A recruitment flyer will be distributed by BCNA,  
58  
59  
60

1  
2  
3 238 PCFA, Bowel Cancer Australia and colorectal cancer Facebook support groups using their  
4  
5 239 existing social media platforms. 3) Study invitations will be sent to supporters registered with  
6  
7 240 BCNA and PCFA who have indicated an interest in learning about research projects. 4) Paid  
8  
9 241 advertisements will run throughout the recruitment period on Facebook, Instagram and Twitter  
10  
11 242 to distribute the project details to a wider audience. The use of paid advertisements in health  
12  
13 243 research is becoming popular and a systematic review has shown this to be an effective  
14  
15 244 recruitment strategy.[25]  
16  
17  
18  
19 245 In all online recruitment methods, people will have access to the recruitment flyer, which will  
20  
21 246 provide a brief overview of the study, the link to the *MindOnLine* registration page and the  
22  
23 247 contact number of the project manager.  
24  
25  
26  
27  
28

#### 29 249 **Health service recruitment procedures**

30 250 If recruitment across social media platforms, advertisements and peak consumer advocacy  
31  
32 251 groups does not generate sufficient participation levels, participating health services  
33  
34 252 oncologists or surgeons involved in the project, will support the recruitment process. The  
35  
36 253 research assistant (RA) at each site will screen patients and confirm eligibility of patients with  
37  
38 254 treating clinicians or with nurses working in the outpatient units. RAs will then contact patients  
39  
40 255 by phone and interested patients will be emailed the study details with a link to the study  
41  
42 256 webpage and registration page). If there is no response from patients, a message will be left  
43  
44 257 on their phone. Two further attempts to reach patients will be made (a week apart), and after a  
45  
46 258 third unsuccessful attempt no further contact will be made. If patients have not enrolled in the  
47  
48 259 study within two weeks, one follow-up phone call will be made to answer any queries patients  
49  
50 260 may have about the study and to assist with registration. We have used similar screening and  
51  
52 261 recruitment approaches in previous studies and they were found to be acceptable and  
53  
54 262 successful.[6]We anticipate a recruitment period of 18-months.  
55  
56  
57  
58  
59  
60

263

**264 Consent and screening**

265 Once directed to the *MindOnLine* registration page, participants will be presented with the plain  
266 language statement and then asked to provide consent (Supplementary file 1). Potential  
267 participants will be asked to provide basic demographic and disease information allowing  
268 screening to ensure they meet study eligibility criteria. Potential participants will also complete  
269 the severity subscale of the FCRI to allow those with scores  $\geq 13$  to be screening into the study.  
270 Those screened into the study will provide their email address and contact number, and directed  
271 to the baseline questionnaires. People who are not eligible will receive an online message  
272 thanking them for their interest in the study and referring them to local support services  
273 provided by leading cancer charities should they require support.

274

**275 Randomisation**

276 Eligible participants will be allocated to treatment groups using random sequences embedded  
277 in the online survey platform Qualtrics, ensuring allocation concealment. Randomisation  
278 (using stratified random permuted blocks) will be conducted in blocks of size 2, stratified by  
279 cancer type (breast, prostate, CRC) and age ( $<60$ ;  $\geq 60$  years old). Participants will be unblinded  
280 to group assignment, while researchers and data analysts will be blinded to the group condition.

281

**282 Waitlist Control group**

283 Participants allocated to the waitlist group will receive usual care. Following randomisation,  
284 they will receive an email with a list of services they may contact for information and  
285 support. They will be informed that they will be granted access to *MindOnLine* intervention  
286 in 9-month's time, when intervention participants have completed the final survey.



287 **Intervention group – MindOnLine program**

288 Participants allocated to the intervention will be provided with the link to *MindOnLine*, which

289 comprises three main components:

290 (1) an educational component to increase participants' knowledge about the science and  
291 practice of mindfulness and how it may benefit them in everyday life;

292 (2) a formal mindfulness meditation practice to improve awareness and emotion regulation;

293 and

294 (3) an informal practice to teach participants how to bring mindfulness to daily activities.

295 A new theme is introduced each week, with a new meditation practice which participants will

296 be encouraged to undertake every day *The MindOnLine* program is detailed in Table 1.

297

298 Table 1- Weekly content of the *MindOnLine* Program

| Week | Theme                       | Meditation                               | Daily practice                              |
|------|-----------------------------|------------------------------------------|---------------------------------------------|
| 1    | Introduction to mindfulness | Breath                                   | Being present with the experience           |
| 2    | Reducing stress             | Body Scan                                | Notice how the body responds to stress      |
| 3    | Relating to emotions        | Working mindfully with emotions          | Noticing the cycle of emotions              |
| 4    | Self-compassion             | Self-compassion                          | Notice self-criticism                       |
| 5    | Communicating mindfully     | Listening/ Sound meditations             | Bringing attention back to the conversation |
| 6    | Living mindfully            | Practising with gentleness and patience  | Pause throughout the day                    |
| 7    | Reducing worries            | Mindfully working with worries and fears | Notice when caught up overthinking          |

|   |                            |                            |                                           |
|---|----------------------------|----------------------------|-------------------------------------------|
| 8 | Reducing worries mindfully | Loving Kindness meditation | Notice acts of kindness                   |
| 9 | Maintaining mindfulness    | Silence with bells         | Notice when distracted from being present |

299

300 Each module's theme will be explained through a short 5-10 minute video. At the end of each  
 301 week, participants will receive an email with a link to the video introducing the theme for the  
 302 upcoming week. The transcripts for the videos will be available for downloading and saving or  
 303 printing in a pdf format so that participants can keep a copy for later reference. At the end of  
 304 each module, participants will receive an automatically generated email reminding them to  
 305 continue daily meditation practice (formal practice) and given specific everyday mindfulness  
 306 exercises to apply during daily activities (informal practice).

307

308 To enhance adherence and retention to the 9-week program and deepen their mindfulness  
 309 experience, participants will have access to additional program features. The features are  
 310 guided by a framework proposed by Abraham and Michie [26] to facilitate behaviour change  
 311 in interventions:

312 1) Twice daily reminders to complete mindfulness practice. Adapted from the pilot study,  
 313 emails containing a link to a short, guided meditation audio file will be sent to  
 314 participants twice daily. These emails will serve as reminders to meditate and will  
 315 provide easy access to the meditation practice of the week.

316 2) Progress tracking. Participants will be able to monitor their own mindfulness practice  
 317 each day by reviewing how many times they have used each section of the program,  
 318 and the duration of use. Embedded usage data tracking systems records each login and  
 319 provides real time representation of program use.

1  
2  
3 320 3) Goal setting. When enrolled in the program, participants will have the opportunity to  
4  
5  
6 321 set goals for their mindfulness practice (Figure 2). Goals are linked to usage data  
7  
8 322 tracking to provide participants with feedback about whether they are reaching their  
9  
10 323 goals. Goals may be practice orientated e.g. to practise mindfulness for five minutes  
11  
12 324 each day, or may be specific to each person's situation e.g. I would like to manage my  
13  
14  
15 325 worries leading up to my oncologist appointment.

16  
17 326 4) Reflective journaling. Participants will have the opportunity to journal their experiences  
18  
19 327 during the mindfulness program by using the "My Journal" functionality (Figure 3).  
20  
21 328 Each week's content will have a journal section, which will include prompts related to  
22  
23 329 mindfulness program content, participants will be able to enter and save their responses  
24  
25  
26 330 within the program for future review. Prompts will be developed specifically for the  
27  
28  
29 331 study.

30  
31 332 The mindfulness program can be accessed at any time via direct login to the website or via the  
32  
33 333 hyperlink sent to participants in the daily e-mails.

34  
35  
36 334

37  
38 335 Figure 2. My Goal functionality in MindOnLine

39  
40  
41 336 (Insert Figure 2 here)

42  
43 337

44  
45 338

46  
47 339 Figure 3. My Journal guided self-reflection practise in MindOnLine

48  
49  
50 340 (Insert Figure 3 here)

51  
52 341

53  
54  
55 342 **Data collection**

56 343 Table 2 illustrates the overall schedule for trial participants in both groups. All assessments  
57  
58 344 will be performed online. The questionnaires at baseline, at nine weeks including the

345 satisfaction survey for those in the intervention group and at nine months, will be sent via  
 346 Qualtrics through an automatically generated schedule. Participants who do not complete  
 347 questionnaires will be followed up by telephone at each data collection point. At baseline,  
 348 participants' demographic information (i.e., gender, age, marital status, current employment  
 349 status, highest level of education, postcode, type of cancer, date of diagnosis, time since end of  
 350 last treatment, type of treatment and previous meditation experience) will be collected.

351

352 Table 2. Schedule of enrolment, interventions, and assessments

353

| TIMEPOINT                         | STUDY PERIOD |            |                 |        |        |        |        |        |        |        |        |                   |
|-----------------------------------|--------------|------------|-----------------|--------|--------|--------|--------|--------|--------|--------|--------|-------------------|
|                                   | Enrolment    | Allocation | Post-allocation |        |        |        |        |        |        |        |        | Post-Intervention |
|                                   |              |            | Week 1          | Week 2 | Week 3 | Week 4 | Week 5 | Week 6 | Week 7 | Week 8 | Week 9 | 9-months          |
| <b>ENROLMENT:</b>                 |              |            |                 |        |        |        |        |        |        |        |        |                   |
| Eligibility screen                | X            |            |                 |        |        |        |        |        |        |        |        |                   |
| Informed consent                  | X            |            |                 |        |        |        |        |        |        |        |        |                   |
| Allocation                        |              | X          |                 |        |        |        |        |        |        |        |        |                   |
| <b>INTERVENTIONS:</b>             |              |            |                 |        |        |        |        |        |        |        |        |                   |
| Immediate access to MindOnLine    |              |            | ←—————→         |        |        |        |        |        |        |        |        |                   |
| Waitlist group                    |              |            |                 |        |        |        |        |        |        |        |        |                   |
| <b>ASSESSMENTS (Both groups):</b> |              |            |                 |        |        |        |        |        |        |        |        |                   |
| Demographic characteristics       | X            |            |                 |        |        |        |        |        |        |        |        |                   |
| FCRI [18]                         | X            |            |                 |        |        |        |        |        |        | X      | X      |                   |
| GAD-7 [20]                        | X            |            |                 |        |        |        |        |        |        | X      | X      |                   |
| PHQ-9 [19]                        | X            |            |                 |        |        |        |        |        |        | X      | X      |                   |
| CAMS-R [22]                       | X            |            |                 |        |        |        |        |        |        | X      | X      |                   |
| AQoL-AD [21]                      | X            |            |                 |        |        |        |        |        |        | X      | X      |                   |
| Mindfulness experience            | X            |            |                 |        |        |        |        |        |        | X      | X      |                   |
| Resource use                      | X            |            |                 |        |        |        |        |        |        | X      | X      |                   |

|                                               |   |  |   |   |   |   |   |   |   |   |   |   |
|-----------------------------------------------|---|--|---|---|---|---|---|---|---|---|---|---|
| <i>COVID-19 measures</i>                      | X |  |   |   |   |   |   |   |   |   | X | X |
| <b>ASSESSMENTS (Intervention group only):</b> |   |  |   |   |   |   |   |   |   |   |   |   |
| <i>Adherence tracking and meditation log</i>  |   |  | X | X | X | X | X | X | X | X | X | X |
| <i>Program satisfaction</i>                   |   |  |   |   |   |   |   |   |   |   | X | X |

354

355 **Outcome measures**356 **Primary outcome**357 **Fear of Cancer Recurrence Inventory (FCRI)**

358 The 42-item Fear of Cancer Recurrence Inventory (FCRI) is a multidimensional FCR scale  
 359 intended for use with all cancer patients. Items were developed on the basis of a cognitive–  
 360 behavioural formulation of FCR (range:0-168).[19] The FCRI consists of seven domains:  
 361 triggers, severity, psychological distress, functional impairment, reassurance, insight and  
 362 coping strategies (scoring range:0-36). It has shown high internal consistency, good construct  
 363 and criterion validity in adults with different cancer types.[20]

364

365 **Secondary outcomes:**366 **Anxiety and Depression**

367 The *Generalized Anxiety Disorder-7 scale (GAD-7)* [22] is a valid and efficient tool for  
 368 assessing generalised anxiety symptoms and assessing severity in clinical practice and  
 369 research. The seven items assess the frequency of core symptoms of generalised anxiety  
 370 disorder within the past 2 weeks (scoring range:0-21).[22]

371 The *Patient Health Questionnaire-9 (PHQ-9)*[20] parallels the nine diagnostic symptom  
 372 criteria that define DSM-IV major depressive disorder. At only 9 items (scoring range:0-27),  
 373 the PHQ-9 is shorter than most depression tools. Unlike most other measures of depression,  
 374 the PHQ-9 was developed, tested and refined for use with medical patients.[21]

375 The PHQ-9 and GAD-7 are recommended for use among cancer survivors in the American  
 376 Society of Clinical Oncology Guidelines. [27]

377

**378 Mindfulness**

379 Trait mindfulness is measured using the Cognitive and Affective Mindfulness Scale-Revised  
380 (CAMS-R), [24] a 10-item self-report questionnaire. This scale uses everyday language  
381 appropriate for those with little meditation experience and is designed to capture mindfulness  
382 as a general daily experience. The questionnaire comprises four domains of mindfulness  
383 (attention, present-focus, awareness, and acceptance/non-judgment). Participants are asked to  
384 rate on a four-point Likert scale how much they relate to each statement (scoring range:4-40).  
385 Compared to other measures of mindfulness, the CAMS-R is unique in that it is related to  
386 psychological distress, [28] which is highly relevant to the current study population.[29]

387

**388 Other outcome measures****389 Mindfulness experience**

390 In order to control for access to external mindfulness-based programs particularly in the waitlist  
391 group, all participants will be asked whether they have enrolled in a mindfulness-based  
392 program in the period between surveys and/or used other supportive care services (e.g. peer  
393 support, psychologists, psychotherapy, counsellors, yoga and meditation).

394

**395 Program satisfaction**

396 Participants in the intervention group will be asked to provide feedback about the *MindOnLine*  
397 program. Quantitative and qualitative data using open ended questions will be collected in  
398 relation to satisfaction with program content, the helpfulness of the program, usability, and  
399 areas for improvement. The satisfaction questionnaire has been adapted from the satisfaction  
400 questionnaire used in the pilot study.[6]

401

## 402 **Economic outcomes**

403 *Assessment of Quality of Life (AQoL 4D)* [23] is a health-related quality of life utility measure.

404 It is generally used in economic evaluations. The *Resource Use Questionnaire* covers general  
405 health care services usage (self-reported), use of other welfare services, and impacts on work  
406 force participation. The questionnaire has been successfully used in cancer psychosocial  
407 intervention studies. [30]

408 The surveys will take approximately 20 minutes to complete.

409

## 410 **Adherence tracking and meditation log**

411 The software package used to run *MindOnLine* was developed at Deakin University and has  
412 inbuilt functionality to collect and clean usage data. Google Analytics has been incorporated  
413 into the platform to allow for validation of findings. Both software will track participants'  
414 online activity, including login date/times, navigation patterns, page views and duration, and  
415 features used (video, audio, goals and reflective journaling).

416

## 417 **Impact of COVID-19**

418 To control for potential environmental impacts on mental wellbeing outcomes, participants will  
419 be asked whether COVID-19 has had an impact on their mental wellbeing in the two weeks  
420 prior to baseline, 9-weeks and 9-month assessments.

421

## 422 **Sample size calculations**

423 Power calculations are conservative, i.e. the detectable differences reported below are possibly  
424 larger than the true detectable differences, because they are based on two-group comparison of  
425 change while the main analysis (see Analysis Plan) will adjust for baseline values of the  
426 outcome and for factors used in the stratified randomisation.[31] The statistical software PASS  
427 version 14.0.9 (NCSS, LLC) was used for all calculations ( $\alpha=0.05$ ; two-sided tests).

428

**429 Primary outcome**

430 Change in FCRI total score between baseline and 9 weeks. The target sample size (200  
431 participants per arm) achieves 94% (80%) power to detect a mean difference between arms of  
432 10 points (8 points) change in FCRI score or 80% power to detect a difference of 8 points  
433 [standard deviation (SD): 23.5;[32]]SD estimate obtained from Butow et al., [32]as their study  
434 included a heterogenous sample of cancer patients while our pilot study only included patients  
435 with melanoma Stage 2-3. The selected effect sizes correspond to Cohen's *d* of 0.43  
436 (moderate/large) and 0.34 (small/moderate) respectively. Currently, there is no definition of a  
437 clinically significant improvement for FCRI score, however, the proposed effect size is  
438 comparable to that described in other studies.[32]

439

**440 Secondary outcomes**

441 The target sample size (200 participants per arm) achieves 80% power to detect an intervention  
442 effect of size 0.34 (Cohen's *f*, small/moderate) at 9 weeks for any of the outcomes. This effect  
443 size corresponds to mean differences between groups of: a) 1.5 point in PHQ-9 depression  
444 score (SD = 4.5, maximum SD reported in patients with breast, colorectal and prostate  
445 cancer;[33] PHQ-9 minimal clinically important difference (MCID) for cancer patients: 2.6 to  
446 5);[34] b) 1.4 point in GAD-7 anxiety score (SD=4.1, maximum SD reported in patients with  
447 breast, colorectal and prostate cancer;[35] MCID=1.95);[33] and mean differences between  
448 group in change from baseline to 9 weeks of: c) 1.2 points in FCRI severity score (SD=3.6,  
449 pilot study effect: 2.6);[6] d) 1.1 points in CAMS-R score (SD=3.4); e) 2.5 points in Worry  
450 score [SD=7.3]; f) 3.0 points in PSS score [SD=8.9]; the last 3 reflecting moderate Cohen's *d*  
451 effect sizes (<0.35).

452



1  
2  
3 453 To meet the sample size needs of our desired statistical power, we will recruit 400 participants.  
4

5 454 In our pilot study, six participants (13%) withdrew in the intervention group and none in the  
6

7  
8 455 control group. Assuming a conservative 30% attrition rate at nine months, we expect to have  
9

10 456 complete data for approximately 280 participants (140 per group).  
11

12 457  
13

### 14 15 458 **Analysis plan**

16 459 All statistical analysis will be conducted on an intention-to-treat basis whereby all randomised  
17

18  
19 460 participants with at least one post-baseline measurement will be analysed by original treatment  
20

21 461 assignment regardless of adherence. Baseline characteristics will be described using summary  
22

23 462 measures selected based on variable distribution. The main analysis will adjust for baseline  
24

25 463 values of the outcome and for factors used in the stratified randomisation.[31]  
26

27  
28 464  
29

30 465 *Aims 1 and 2.* The effect of the intervention on each of the outcomes, defined as change from  
31

32 466 baseline to nine weeks, will be assessed using linear models including group and the  
33

34 467 stratification factors. *Aim 3.* The effect of the intervention across the three measurement times  
35

36 468 will be estimated using linear mixed models, including study group, time (categorical: 9 weeks,  
37

38 469 9 months) interaction group×time and the stratification factors as fixed effects and participant  
39

40 470 as a random effect. If there is a positive intervention effect on mental health outcomes,  
41

42 471 exploratory mediation analyses will be conducted to determine whether improvements are  
43

44 472 mediated by increases in mindfulness.[36] For outcomes where it is a plausible assumption that  
45

46 473 missing data are completely at random, we will use complete case analysis; if not plausible, we  
47

48  
49 474 will use multiple imputation. *Subgroup analysis:* We will explore whether age or gender  
50

51 475 modify the effect of the intervention on FCR, depression and anxiety at 9 weeks.  
52

53  
54 476  
55  
56  
57  
58  
59  
60

1  
2  
3 477 *Aim 4.* This study will also comprise a cost-consequences analysis where incremental costs of  
4  
5 478 the intervention will be compared with the full spectrum of outcomes included in the study. A  
6  
7 479 series of cost-effectiveness ratios can be determined which have been shown to be useful for  
8  
9 480 decision-makers. Inclusion of the AQoL 4D will also enable a cost-utility analysis to be  
10  
11 481 undertaken, thereby allowing practical judgements to be made regarding value for money  
12  
13 482 credentials of the intervention. Nevertheless, the economic analysis will be primarily from the  
14  
15 483 perspective of the health care sector and a secondary analysis from the broader societal  
16  
17 484 perspective will also be undertaken. A detailed costing of the intervention will be undertaken  
18  
19 485 and the evaluation will first measure and value any change to the use of health care resources  
20  
21 486 over the period of the study between the two arms of the trial and then compare any additional  
22  
23 487 costs to the additional outcomes achieved. Standardised economic evaluation techniques will  
24  
25 488 be used including incremental analysis of mean differences and bootstrapping to determine  
26  
27 489 confidence intervals along with a net monetary analysis to determine the cost-effectiveness of  
28  
29 490 the intervention for different value for money threshold criteria. The costs of routine roll-out  
30  
31 491 will be estimated.

32  
33  
34  
35  
36  
37  
38  
39  
40  
41  
42  
43  
44  
45  
46  
47  
48  
49  
50  
51  
52  
53  
54  
55  
56  
57  
58  
59  
60

492  
493 *MindOnLine* usage data by the intervention group will be reported using descriptive statistics.  
494 Linear mixed models, with random intercept and slope for each person, will be fitted to estimate  
495 time trends in usage.

#### 496 **Data management**

497 Data will be exported from Qualtrics on a monthly basis and crossed checked during  
498 exportation to ensure accuracy in results. All identifying participant information will be  
499 removed from data sets. Documents containing sensitive information will be saved as password  
500 protected files and stored within the Deakin University One Drive.

#### 501 **Monitoring**

502 Data

1  
2  
3 503 The adherence data will be monitored by the program developer. The program developer does  
4  
5 504 not have any competing interests. Other project data will be monitored by the project steering  
6  
7 505 committee with regular meetings and progress updates. No interim analysis will be performed  
8  
9 506 during the trial.

### 12 507 **Patient and Public Involvement**

14 508 Representatives from three consumer organisations have been involved in the design and  
15  
16 509 implementation of the project since its inception. Their contribution has included development  
17  
18 510 of the intervention and its content, wording on recruitment material, and provided advice on  
19  
20 511 recruitment strategies. Representatives from each consumer organisation has contributed to  
21  
22 512 project steering meetings.

### 27 513 **Ethics and Dissemination**

#### 30 514 **Harms**

31 515 All participants will be required to provide written informed consent. In the event that a  
32  
33 516 participant reports distress to the project manager they will be advised to seek assistance from  
34  
35 517 the regular medical professionals and provided with additional referrals to lifeline.org.au.  
36  
37 518 Ethics approval was obtained from the Peter MacCallum Cancer Centre (20-53) and Deakin  
38  
39 519 University (2020-284). Any adverse events will be reported to the ethics committees.  
40  
41  
42  
43

44 520

#### 46 521 **Auditing**

47 522 The trial may be audited by the governing Human Research Ethics Committees.

#### 49 523 **Protocol amendments**

50 524 Protocol amendments will be approved by the governing Human Research Ethics Committees.

51 525 Any relevant changes will be submitted as a modification to the Australian and New Zealand

52 526 Clinical Trial Registry.

1  
2  
3 527 **Dissemination**

4  
5 528 The findings of this study will be written by study authors and published in peer reviewed  
6  
7 529 journals project steering committee. All identifying participant information will be removed  
8  
9 530 prior to publication.  
10  
11

12  
13 531 **Discussion**

14  
15  
16 532 One of the most significant changes across society is the use of web-based technology. Online  
17  
18 533 mindfulness-based interventions circumvent problems with traditional face-to-face delivery of  
19  
20 534 the program, impacted by work commitments, caring responsibilities, geographic isolation and  
21  
22 535 pandemics[37, 38].  
23  
24  
25

26 536

27  
28 537 This study will rigorously evaluate the efficacy of a self-directed online mindfulness program  
29  
30 538 in reducing FCR in breast, prostate and CRC survivors. The study will advance the literature  
31  
32 539 regarding the benefits of mindfulness for cancer survivors by representing one of few large  
33  
34 540 well controlled trials of a self-directed mindfulness-based program, involving smartphone  
35  
36 541 technology, aimed at reducing FCR. Including a health economic evaluation of the program  
37  
38 542 adds to the utility of the trial with the study providing information that budget holders and  
39  
40 543 policy makers need when considering recommendations and support for supportive care  
41  
42 544 programs. This trial will fill a gap in knowledge regarding the potential impact of an online  
43  
44 545 mindfulness program in supporting cancer survivors.[7] Extensive pilot work in identifying the  
45  
46 546 type of program cancer survivors are interested in, involving consumers in designing the  
47  
48 547 content and length of the program and providing reminders and practice tips increase the  
49  
50 548 likelihood of participants engaging with the program and the intervention having a positive  
51  
52 549 impact.  
53  
54  
55

56 550  
57  
58  
59  
60

1  
2  
3 551 The study is being conducted in partnership with health services and cancer advocacy groups.  
4  
5 552 As partners in the study, they will ensure the intervention can be rolled out to cancer survivors  
6  
7 553 if shown to be effective. In addition to consumer advocacy groups, the study is being conducted  
8  
9 554 in partnership with government. As we expect the *MindOnLine* intervention to improve health  
10  
11 555 outcomes, reduce the fear and distress in cancer survivorship and reduce health service and  
12  
13 556 community costs our partnership with government will ensure that policy makers are informed  
14  
15 557 of the study's findings particularly cost-effectiveness findings.  
16  
17  
18  
19  
20

21 559 The study has a number of strengths and weaknesses. Development of the intervention through  
22  
23 560 a review of the literature, input from consumers and findings from a pilot study and  
24  
25 561 involvement of consumer advocacy groups and government are study strengths ensuring  
26  
27 562 translation of the program into practice if shown to be effective. For example, consumer  
28  
29 563 advocacy groups have contributed to the design of the intervention program, recruitment of  
30  
31 564 eligible patients, and will provide advice on the interpretation of results, dissemination and  
32  
33 565 translation. Incorporating an economic evaluation into the study design is a strength as it will  
34  
35 566 complement clinical findings and support decision-making processes for potential  
36  
37 567 implementation.  
38  
39  
40  
41  
42  
43

44 569 However, several methodological limitations also need to be acknowledged. Recruitment  
45  
46 570 through social media platforms means we cannot accurately assess uptake of the intervention,  
47  
48 571 as we will not be able to identify the number of eligible people exposed to our advertisements.  
49  
50 572 This may limit our ability to determine reach of the program. However, recording the time  
51  
52 573 taken for recruitment and accessing google analytic data on internet traffic and page visits may  
53  
54 574 provide some information in this area. Participants will need access to the internet to  
55  
56 575 participate. While this may mean some people will be excluded from the study, we believe this  
57  
58  
59  
60

1  
2  
3 576 will have minimal impact on the study. We envisage that the study will take approximately 4  
4  
5 577 years to complete. Advances in social platforms, technology and app-based programming can  
6  
7 578 change substantially in a short period. While this may affect the actual online platform used for  
8  
9 579 the program, we do not consider this will influence the program content or delivery  
10  
11 580 mechanisms. As technology advances will likely increase interest in self-directed support  
12  
13 581 programs for cancer survivors, it is essential that cancer survivors access programs with  
14  
15 582 demonstrated effectiveness.  
16  
17  
18  
19  
20

21 584 **Trial Registration** ACTRN12620000645954

22 585 **Protocol Version:** Version 5, dated 18 December 2020

23  
24 586 Recruitment commenced 12.10.2020, it is anticipated recruitment will be for a duration of 18  
25  
26 587 months finishing on 12.04.2022.  
27  
28  
29  
30

31 588

### 32 589 **Abbreviations**

33 590 AQL-4D Assessment of Quality of Life – 4 Dimensions

34 591 BCNA Breast Cancer Network Australia

35 592 CAMSR Cognitive and Affective Mindfulness Scale-Revised

36 593 CI Confidence interval

37 594 CRC Colorectal Cancer

38 595 FCR Fear of cancer recurrence

39 596 FCRI Fear of Cancer Recurrence Inventory

40 597 GAD-7 General Anxiety Disorder scale

41 598 MBCT Mindfulness-based cognitive therapy

42 599 MCID Minimally clinically important difference

43 600 PCFA Prostate Cancer Foundation of Australia

1  
2  
3 601 PHQ-9 Patient Health Questionnaire  
4

5 602 QALY Quality of Life Years  
6

7 603 QoL Quality of Life  
8

9 604 RA Research assistant  
10

11 605 RCT Randomized controlled trial  
12

13 606 SD standard deviation  
14  
15  
16  
17

18 607 **References**  
19

20  
21 608 1. Australian Institute of Health and Welbeing. Australia's health in brief 2020.  
22

23 609 Canberra: AIHW, 2020.  
24

25 610 2. Carlson LE. Mindfulness-based interventions for coping with cancer. *Annals of*  
26  
27 *the New York Academy of Sciences* 2016;1373(1):5-12. doi: 10.1111/nyas.13029  
28  
29 611

30 612 3. Simard S, Thewes B, Humphris G, et al. Fear of cancer recurrence in adult cancer  
31  
32 survivors: a systematic review of quantitative studies. *J Cancer Surviv*  
33  
34 2013;7(3):300-22. doi: 10.1007/s11764-013-0272-z [published Online First:  
35  
36 614 2013/03/12]  
37  
38 615

39 616 4. Mitchell A. Pooled Results From 38 Analyses of the Accuracy of Distress  
40  
41 Thermometer and Other Ultra-Short Methods of Detecting Cancer-Related Mood  
42  
43 Disorders. *Journal of Clinical Oncology* 2007;25(29):4670-81. doi:  
44  
45 618 10.1200/jco.2006.10.0438  
46  
47 619

48 620 5. Savard J, Ivers H. The evolution of fear of cancer recurrence during the cancer  
49  
50 care trajectory and its relationship with cancer characteristics. *Journal of*  
51  
52 621 *Psychosomatic Research* 2013;74(4):354-60. doi:  
53  
54 622 <https://doi.org/10.1016/j.jpsychores.2012.12.013>  
55  
56 623  
57  
58  
59  
60

- 1  
2  
3 624 6. Russell L, Ugalde A, Orellana L, et al. A pilot randomised controlled trial of an  
4  
5 625 online mindfulness-based program for people diagnosed with melanoma.  
6  
7 626 *Supportive Care in Cancer* 2019;27(7):2735-46. doi: 10.1007/s00520-018-4574-6  
8  
9  
10 627 7. Keng S-L, Smoski MJ, Robins CJ. Effects of mindfulness on psychological  
11  
12 628 health: A review of empirical studies. *Clinical Psychology Review*  
13  
14 629 2011;31(6):1041-56. doi: <https://doi.org/10.1016/j.cpr.2011.04.006>  
15  
16  
17 630 8. Piet J, Wurtzen H, Zachariae R. The effect of mindfulness-based therapy on  
18  
19 631 symptoms of anxiety and depression in adult cancer patients and survivors: a  
20  
21 632 systematic review and meta-analysis. *J Consult Clin Psychol* 2012;80(6):1007-20.  
22  
23 633 doi: 10.1037/a0028329 [published Online First: 2012/05/09]  
24  
25  
26 634 9. Chambers SK, Occhipinti S, Foley E, et al. Mindfulness-Based Cognitive Therapy  
27  
28 635 in Advanced Prostate Cancer: A Randomized Controlled Trial. *Journal of Clinical*  
29  
30 636 *Oncology* 2017;35(3):291-97. doi: 10.1200/jco.2016.68.8788  
31  
32  
33 637 10. Crane RS, Brewer J, Feldman C, et al. What defines mindfulness-based programs?  
34  
35 638 The warp and the weft. *Psychological Medicine* 2017;47(6):990-99. doi:  
36  
37 639 10.1017/S0033291716003317 [published Online First: 2016/12/29]  
38  
39  
40 640 11. van Emmerik AAP, Berings F, Lancee J. Efficacy of a Mindfulness-Based Mobile  
41  
42 641 Application: a Randomized Waiting-List Controlled Trial. *Mindfulness*  
43  
44 642 2018;9(1):187-98. doi: 10.1007/s12671-017-0761-7  
45  
46  
47 643 12. Toivonen KI, Zernicke K, Carlson LE. Web-Based Mindfulness Interventions for  
48  
49 644 People With Physical Health Conditions: Systematic Review. *Journal of Medical*  
50  
51 645 *Internet Research*, 2017. **19**(8): p. e303. doi: 10.2196/jmir.7487  
52  
53  
54 646 13. Compen F, Bisseling E, Schellekens M, et al. Face-to-Face and Internet-Based  
55  
56 647 Mindfulness-Based Cognitive Therapy Compared With Treatment as Usual in  
57  
58 648 Reducing Psychological Distress in Patients With Cancer: A Multicenter  
59  
60



- 1  
2  
3 649 Randomized Controlled Trial. *Journal of Clinical Oncology* 2018;36(23):2413-21.  
4  
5 650 doi: 10.1200/JCO.2017.76.5669  
6  
7  
8 651 14. Zernicke KA, Campbell TS, Specia M, et al. The eCALM Trial: eTherapy for  
9  
10 652 Cancer Applying Mindfulness. Exploratory Analyses of the Associations Between  
11  
12 653 Online Mindfulness-Based Cancer Recovery Participation and Changes in Mood,  
13  
14 654 Stress Symptoms, Mindfulness, Posttraumatic Growth, and Spirituality.  
15  
16 655 Mindfulness, 2016:1071-81.  
17  
18  
19 656 15. Bruggeman-Everts FZ, Wolvers MDJ, van de Schoot R, et al. Effectiveness of  
20  
21 657 Two Web-Based Interventions for Chronic Cancer-Related Fatigue Compared to  
22  
23 658 an Active Control Condition: Results of the “Fitter na kanker” Randomized  
24  
25 659 Controlled Trial. *J Med Internet Res* 2017;19(10):e336. doi: 10.2196/jmir.7180  
26  
27  
28 660 16. Russell L, Ugalde A, Milne D, et al. Digital Characteristics and Dissemination  
29  
30 661 Indicators to Optimize Delivery of Internet-Supported Mindfulness-Based  
31  
32 662 Interventions for People With a Chronic Condition: Systematic Review. *JMIR*  
33  
34 663 *Ment Health* 2018;5(3):e53. doi: 10.2196/mental.9645 [published Online First:  
35  
36 664 2018/08/23]  
37  
38  
39 665 17. Russell L, Orellana L, Ugalde A, et al. Exploring Knowledge, Attitudes, and  
40  
41 666 Practice Associated With Meditation Among Patients With Melanoma. *Integr*  
42  
43 667 *Cancer Ther* 2018;17(2):237-47. doi: 10.1177/1534735417699514 [published  
44  
45 668 Online First: 2017/06/20]  
46  
47  
48 669 18. Sharpe, L., et al., Psychological intervention (ConquerFear) for treating fear of  
49  
50 670 cancer recurrence: mediators and moderators of treatment efficacy. *Journal of*  
51  
52 671 *Cancer Survivorship*, 2019. 13(5): p. 695-702. doi: 10.1007/s11764-019-00788-4  
53  
54  
55  
56  
57  
58  
59  
60

- 1  
2  
3 672 19. Smith AB, Thewes B, Turner J, et al. Pilot of a theoretically grounded  
4  
5 673  
6  
7  
8 674 *Psycho-Oncology* 2015(8):967. doi: 10.1002/pon.3775  
9  
10 675 20. Simard S, Savard J. Screening and comorbidity of clinical levels of fear of cancer  
11  
12 676 recurrence. *Journal of Cancer Survivorship* 2015;9(3):481-91. doi:  
13  
14 677 10.1007/s11764-015-0424-4  
15  
16 678 21. Kroenke K, Spitzer RL, Williams JBW. The PHQ-9: validity of a brief depression  
17  
18 679 severity measure. *Journal of General Internal Medicine* 2001;16(9):606-13. doi:  
19  
20 680 10.1046/j.1525-1497.2001.016009606.x  
21  
22  
23 681 22. Löwe B, Decker O, Müller S, et al. Validation and Standardization of the  
24  
25 682 Generalized Anxiety Disorder Screener (GAD-7) in the General Population.  
26  
27 683 *Medical Care* 2008;46(3):266-74. doi: 10.1097/MLR.0b013e318160d093  
28  
29  
30 684 23. Richardson J, Iezzi A, Khan MA, et al. Validity and Reliability of the Assessment  
31  
32 685 of Quality of Life (AQoL)-8D Multi-Attribute Utility Instrument. *The Patient -*  
33  
34 686 *Patient-Centered Outcomes Research* 2014;7(1):85-96. doi: 10.1007/s40271-013-  
35  
36 687 0036-x  
37  
38  
39 688 24. Feldman G, Hayes A, Kumar S, et al. The Development and Initial Validation of  
40  
41 689 the Cognitive and Affective Mindfulness Scale-Revised (CAMS-R). *Journal of*  
42  
43 690 *Psychopathology and Behavioral Assessment* 2006;29(3):177. doi:  
44  
45 691 10.1007/s10862-006-9035-8  
46  
47  
48 692 25. Whitaker C, Stevelink S, Fear N. The Use of Facebook in Recruiting Participants  
49  
50 693 for Health Research Purposes: A Systematic Review. *Journal of medical Internet*  
51  
52 694 *research* 2017;19(8):e290-e90. doi: 10.2196/jmir.7071  
53  
54  
55 695 26. Abraham C, Michie S. A taxonomy of behavior change techniques used in  
56  
57 696 interventions. *Health psychology : official journal of the Division of Health*  
58  
59  
60

- 1  
2  
3 697 *Psychology*, American Psychological Association 2008;27(3):379-87. doi:  
4  
5 698 10.1037/0278-6133.27.3.379 [published Online First: 2008/07/16]  
6  
7  
8 699 27. Andersen BL, DeRubeis RJ, Berman BS, et al. Screening, Assessment, and Care  
9  
10 700 of Anxiety and Depressive Symptoms in Adults With Cancer: An American  
11  
12 701 Society of Clinical Oncology Guideline Adaptation. *Journal of Clinical Oncology*  
13  
14 702 2014;32(15):1605-19. doi: 10.1200/jco.2013.52.4611  
15  
16  
17 703 28. Bergomi C, Tschacher W, Kupper Z. The Assessment of Mindfulness with Self-  
18  
19 704 Report Measures: Existing Scales and Open Issues. *Mindfulness* 2013;4(3):191-  
20  
21 705 202. doi: 10.1007/s12671-012-0110-9  
22  
23  
24 706 29. Kasparian NA, McLoone JK, Butow PN. Psychological Responses and Coping  
25  
26 707 Strategies Among Patients With Malignant Melanoma: A Systematic Review of  
27  
28 708 the Literature. *Archives of Dermatology* 2009;145(12):1415-27. doi:  
29  
30 709 10.1001/archdermatol.2009.308  
31  
32  
33 710 30. Livingston PM, Heckel L, Orellana L, et al. Outcomes of a randomized controlled  
34  
35 711 trial assessing a smartphone Application to reduce unmet needs among people  
36  
37 712 diagnosed with CancEr (ACE). *Cancer Medicine* 2020;9(2):507-16. doi:  
38  
39 713 10.1002/cam4.2718  
40  
41  
42 714 31. Yang L, Tsiatis AA. Efficiency Study of Estimators for a Treatment Effect in a  
43  
44 715 Pretest–Posttest Trial. *The American Statistician* 2001;55(4):314-21. doi:  
45  
46 716 10.1198/000313001753272466  
47  
48  
49 717 32. Butow PN, Turner J, Gilchrist J, et al. Randomized Trial of ConquerFear: A  
50  
51 718 Novel, Theoretically Based Psychosocial Intervention for Fear of Cancer  
52  
53 719 Recurrence. *Journal of Clinical Oncology* 2017;35(36):4066-77. doi:  
54  
55 720 10.1200/jco.2017.73.1257  
56  
57  
58  
59  
60

- 1  
2  
3 721 33. Hartung TJ, Brähler E, Faller H, et al. The risk of being depressed is significantly  
4  
5 722 higher in cancer patients than in the general population: Prevalence and severity of  
6  
7 723 depressive symptoms across major cancer types. *European Journal of Cancer*  
8  
9 724 2017;72:46-53. doi: 10.1016/j.ejca.2016.11.017  
10  
11  
12 725 34. Scott EL, Kroenke K, Wu J, et al. Beneficial Effects of Improvement in  
13  
14 726 Depression, Pain Catastrophizing, and Anxiety on Pain Outcomes: A 12-Month  
15  
16 727 Longitudinal Analysis. *The Journal of Pain* 2016;17(2):215-22. doi:  
17  
18 728 10.1016/j.jpain.2015.10.011  
19  
20  
21 729 35. Faller H, Brähler E, Härter M, et al. Unmet needs for information and  
22  
23 730 psychosocial support in relation to quality of life and emotional distress: A  
24  
25 731 comparison between gynecological and breast cancer patients. *Patient Education*  
26  
27 732 *and Counseling* 2017;100(10):1934-42. doi:  
28  
29 733 <https://doi.org/10.1016/j.pec.2017.05.031>  
30  
31  
32  
33 734 36. Labelle LE, Campbell TS, Carlson LE. Mindfulness-Based Stress Reduction in  
34  
35 735 Oncology: Evaluating Mindfulness and Rumination as Mediators of Change in  
36  
37 736 Depressive Symptoms. *Mindfulness* 2010;1(1):28-40. doi: 10.1007/s12671-010-  
38  
39 737 0005-6  
40  
41  
42 738 37. Simard S, Savard J. Fear of Cancer Recurrence Inventory: Development and  
43  
44 739 initial validation of a multidimensional measure of fear of cancer recurrence.  
45  
46 740 *Supportive care in cancer*. 2008. 17: p. 241-51. DOI:10.1007/s00520-008-0444-y  
47  
48  
49 741 38. Behan C. The benefits of meditation and mindfulness practices during times of  
50  
51 742 crisis such as COVID-19. *Irish journal of psychological medicine*, 2020. 37(4): p.  
52  
53 743 256-258. doi: 10.1017/ipm.2020.38  
54  
55  
56 744  
57  
58  
59  
60

1  
2  
3 745 **Declarations**  
4  
5

6 746 **Author's contributions**  
7

8 747 PML, LR, LO, NW, MJ, AG, DWA, EO, CM, AU, RC, J P-N, DH, MB, BR, KW, MF, ABS,

9 748 KP, MS, DC and VW contributed to the conception of the program or design of the study.  
10

11 749 EO designed the web platform and analytics with input from LR, NW, RC, DWA, AW,  
12

13 750 PML. CM designed the economic component of the study. PML, LR, LO, NW, MJ, AG,  
14

15 751 DWA, EO, CM, AU, RC, J P-N, DH, MB, BR, KW, MF, ABS, KP, SS, AW, KG, MS, DC,  
16

17 752 BP and VW provided substantial input into the development of the protocol or revising it  
18

19 753 critically for important intellectual content. PML, LR, NW, LO and VW drafted the  
20

21 754 manuscript with contributions from MJ, AG, DWA, EO, CM, AU, RC, J P-N, DH, MB, BR,  
22

23 755 KW, MF, ABS, KP, SS, AW, KG, MS, DC, BP.  
24

25 756 Each of the authors contributed to, read and approved the final manuscript.  
26

27 757 Each of the co-authors, PML, LR, LO, NW, MJ, AG, DWA, EO, CM, AU, RC, J P-N, DH,  
28

29 758 MB, BR, KW, MF, ABS, KP, SS, AW, KG, MS, DC, BP and VW, are on the steering  
30

31 759 committee, will oversee implementation of the study and data collection and will contribute  
32

33 760 to the acquisition, analysis or interpretation of the data.  
34

35 761  
36

37 762 **Funding**  
38

39 763 This study is funded by the National Health and Medical Research Council (NHMRC)  
40

41 764 Partnership Grant ID APP1179317. The funder supported the cost of undertaking the project.  
42

43 765 **Competing interests**  
44

45 766 The authors declare they have no competing interests.  
46

47 767  
48

49 768 **Figure Legend/Caption:**  
50

51 769 Figure 1. Study flowchart  
52  
53  
54  
55  
56  
57  
58  
59  
60

1  
2  
3 770  
4  
5  
6 771 FCRI (Fear of Cancer Recurrence Inventory); GAD-7 (General Anxiety and Distress scale;  
7  
8 772 PHQ-9 (Patient Health Questionnaire); CAMS-R (Cognitive and Affective Mindfulness Scale  
9  
10 773 – Revised); AQoL-4D (Assessment of Quality of Life – 4 Dimensions)  
11  
12 774  
13  
14  
15 775 Figure 2. My Goal functionality in MindOnLine  
16  
17 776  
18  
19 777 Figure 3. My Journal guided self-reflection practise in MindOnLine.  
20  
21  
22  
23  
24  
25  
26  
27  
28  
29  
30  
31  
32  
33  
34  
35  
36  
37  
38  
39  
40  
41  
42  
43  
44  
45  
46  
47  
48  
49  
50  
51  
52  
53  
54  
55  
56  
57  
58  
59  
60

Figure 2. My Goal functionality in MindOnLine

Figure 3. My Journal guided self-reflection practise in MindOnLine.



Figure 1. Study flowchart.

338x190mm (400 x 400 DPI)

1  
2  
3  
4  
5  
6  
7  
8  
9  
10  
11  
12  
13  
14  
15  
16  
17  
18  
19  
20  
21  
22  
23  
24  
25  
26  
27  
28  
29  
30  
31  
32  
33  
34  
35  
36  
37  
38  
39  
40  
41  
42  
43  
44  
45  
46  
47  
48  
49  
50  
51  
52  
53  
54  
55  
56  
57  
58  
59  
60



Figure 2. My goal functionality in MondOnLine.

218x120mm (400 x 400 DPI)





Figure 3. My journal guided self-reflection practice in MindOnline.

308x100mm (400 x 400 DPI)



**Peter Mac**  
Peter MacCallum Cancer Centre  
Victoria Australia



**Epworth**



**Prostate Cancer  
Foundation  
of Australia**



**VICTORIA**  
State Government

Health  
and Human  
Services



**Breast  
Cancer  
Network  
Australia**

## Participant Information Sheet/Consent Form

|                               |                                                                                     |
|-------------------------------|-------------------------------------------------------------------------------------|
| <b>Title</b>                  | MindOnLine: a mindfulness program for people with breast, bowel or prostate cancer. |
| <b>Short Title</b>            | MindOnLine                                                                          |
| <b>Principal Investigator</b> | Prof Trish Livingston                                                               |
| <b>Location</b>               | Deakin University                                                                   |

### Part 1 What does my participation involve?

#### 1 Introduction

You are invited to take part in this research project, because you have received treatment for breast, prostate or bowel cancer. This research project is testing an online mindfulness-based program for people who have completed their treatment.

This Participant Information Sheet/Consent Form tells you about the research project. It explains the procedures involved. Knowing what is involved will help you decide if you want to take part in the research.

Please read this information carefully. Ask questions about anything that you don't understand or want to know more about. Before deciding whether or not to take part, you might want to talk about it with a relative, friend or healthcare worker.

Participation in this research is voluntary. If you don't wish to take part, you don't have to. You will receive the best possible care whether or not you take part.

If you decide you want to take part in the research project, you will be asked to provide consent online. By agreeing you are telling us that you:

- Understand what you have read
- Consent to take part in the research project
- Consent to have the tests and treatments that are described
- Consent to the use of your personal and health information as described.

#### 2 What is the purpose of this research?

Following treatment for cancer, many people feel anxious and scared about the cancer coming back. This is one of the most common fears of cancer survivors, and it can affect people's ability to enjoy life

1 and plan for the future. In some people, this fear can decrease over time, but most people find that they  
2 worry at certain times. The mindfulness program aims to help cancer survivors to manage their fears  
3 and worries once treatment is completed.  
4

5 Research has shown that mindfulness-based programs can help people cope with anxious thoughts  
6 about their cancer. The internet allows people to use the program from the comfort of their home, and  
7 at their most convenient times. We have tested an online mindfulness program for people who received  
8 treatment for melanoma, with promising results. This research is to find out whether mindfulness can  
9 help people with breast, prostate or bowel cancer.  
10

11 This research is being conducted across healthcare services and cancer organisations and is led by  
12 researchers at the School of Nursing and Midwifery at Deakin University.  
13  
14

15 In this research project we will be testing a mindfulness program among people who meet the following  
16 criteria:  
17

- 18 - People who are over 18 years of age
- 19 - People who speak English well enough to understand videos and surveys presented in English
- 20 - People who have access to a computer or device to receive the program
- 21 - People who received treatment for breast, bowel or prostate cancer
- 22 - People who finished chemotherapy, radiotherapy or surgery treatment within the last five years
- 23 - People who experience a high level of fear of cancer recurrence.  
24

25 You will be asked some questions after providing consent to determine if you meet the eligibility criteria  
26 above. To measure your fear of cancer recurrence you will be asked 9 questions about how your  
27 thoughts and feelings towards cancer may impact on your everyday living.  
28

### 29 **3 What does participation involve?**

30  
31 To participate in this study, each participant will need to have access to a computer, a smartphone, or a  
32 similar tablet device, and internet. If you agree to take part in this project you will be allocated to either  
33 receive the mindfulness program (intervention group) or stay in your usual care (control group). We  
34 need to compare responses from people in these two groups to see if the mindfulness program provides  
35 any benefits to cancer survivors. In order to make sure the groups are the same, participants are put  
36 into one of the two groups by chance (random).  
37  
38

39 If you decide to take part in this study, you will need to provide your consent to participate by accessing  
40 the following website: <https://mindonline.org.au> Before providing your consent you will be asked a  
41 number of questions to make sure you are eligible for the study.  
42

43 After consenting to take part in the study, you will be asked to complete a survey before being randomly  
44 allocated to the intervention or control group. The same survey will be completed again 9 weeks and 9  
45 months later. The survey asks you questions about possible fears of the cancer coming back, how  
46 stressful and worrisome you perceive your life to be, and the type of thoughts you generally focus on.  
47 We will also collect your email address and contact number. Your email and contact number will be used  
48 to send you reminders and other information related to the study.  
49

50  
51 If you are randomised to the mindfulness program, you will receive an email informing you of your  
52 allocation group with instructions on how to access the website. Your participation will involve using the  
53 program for 9 weeks. The program is designed to help you understand and experience potential benefits  
54 of using mindfulness in your day to day life. You will be invited to:  
55

- 56 - Watch short videos at the start of each week. The videos will introduce a new topic about  
57 mindfulness.
- 58 - Practice short meditations twice a day. We will help you create a meditation routine by emailing  
59 you a direct link to guided meditations at times you will have chosen.
- 60 - Apply mindfulness skills in your day-to-day life.

1  
2 If you are assigned to the mindfulness program we will monitor how often the mindfulness program is  
3 used. This will be recorded by your study identification number, and no personal information such as  
4 your Internet Protocol (IP) address linked to your computer or device will be collected.  
5

6 If you are randomised to the control group you will receive an email informing you of your allocation  
7 group and you will continue to receive your usual care from your healthcare providers. You will receive  
8 emails to ask you to complete the questionnaires at 9 weeks and 9 months. After the 9-month survey  
9 you will be able to use the mindfulness program.  
10

11  
12 We will compare the results between those in the mindfulness program and those who are not, to see if  
13 there are any differences in wellbeing between the two groups.  
14

15 There are no additional costs associated with participating in this research project, nor will you be paid.  
16  
17

#### 18 19 **4 Other relevant information about the research project**

20  
21 This study will show if the mindfulness program is helpful for people with breast, prostate or colorectal  
22 cancer. If successful the program we be made open to the wider population.  
23

24 For this study, approximately 400 people will be invited to participate from online and social media  
25 advertisements and from healthcare services.  
26  
27

#### 28 29 **5 Do I have to take part in this research project?**

30  
31 Participation in any research project is voluntary. If you do not wish to take part you don't have to. If  
32 you decide to take part and later change your mind, you are free to withdraw from the project at any  
33 stage.  
34

35 Your decision whether to take part or not to take part, or to take part and then withdraw, will not affect  
36 your relationship with those treating you or involved in your follow-up care, or your relationship with  
37 Deakin University, Breast Cancer Network Australia, or Prostate Cancer Foundation of Australia.  
38  
39

#### 40 41 **6 What are the possible benefits of taking part?**

42  
43 We cannot guarantee or promise that you will receive any benefits from this research; however,  
44 possible benefits for the community may include additional support for people who have completed  
45 treatment for cancer.  
46  
47

#### 48 49 **7 What are the possible risks?**

50  
51 Some people may feel uncomfortable or upset when answering questions in this survey. If you do not  
52 wish to answer a question you may skip it and go to the next question, or you may stop immediately. In  
53 the event that you become upset or distressed as a result of your participation, the researcher can  
54 arrange for counselling or other appropriate support provided by staff who are not members of the  
55 research team. In addition, you may want to contact an external support service such as Lifeline services  
56 on 13 11 14, or [www.mindhealthconnect.org.au](http://www.mindhealthconnect.org.au) or the Cancer Council 13 11 20 telephone service.  
57 If you have any concerns or are unsure whether you should participate in this project, you may wish to  
58 speak to your healthcare professional about your feelings.  
59  
60

## 8 What if I withdraw from this research project?

If you decide to withdraw, please notify a member of the research team about this decision. This notice will ensure that we can remove you from our records and will mean you will not receive any notices about the project.

If you decide to withdraw from the project, we would like to keep the personal and health information about you that has been collected. This is to help us make sure that the results of the research can be measured properly. If you want to withdraw your data from the study as well, please let them know when you tell them about withdrawing from the study.

## 9 What happens when the research project ends?

If you wish to obtain a final copy of the research report describing the results of this study, please contact the project manager (Dr Natalie Heynsbergh on 03 9246 8225, or email [n.heynsbergh@deakin.edu.au](mailto:n.heynsbergh@deakin.edu.au)) and she will arrange for a copy to be sent to you after completion of the study in December 2022.

## Part 2 How is the research project being conducted?

### 10 What will happen to information about me?

Any information obtained in connection with this research project that can identify you (e.g. email address) will remain confidential and will only be used for the purpose of this research project. It will only be disclosed with your permission, except as required by law.

All the information you provide will be coded so you cannot be identified by name, and only the research team will have access to the list that can link your name to your data. All identifying information will be stored in password-protected electronic files or in a locked filing cabinet in the office of the research staff, and will be disposed of as confidential waste after five years.

You will not be identified in any report or publication from this study. Information will be provided in such a way that you cannot be identified.

In accordance with relevant Australian and/or Victorian privacy and other relevant laws, you have the right to access the information collected and stored by the researchers about you. You also have the right to request that any information with which you disagree be corrected. Please contact one of the researchers named in the last section below if you would like to access your information.

### 11 Who is organising and funding the research?

This research project is being managed by Dr Natalie Heynsbergh at Deakin University, and is being funded by a National Health and Medical Research Council (NHMRC) grant.

### 12 Who has reviewed the research project?

All research in Australia involving humans is reviewed by an independent group of people called a Human Research Ethics Committee (HREC). The ethical aspects of this research project have been

approved by the Peter MacCallum Human Research Ethics Committee (Reference number 20/53) and the Deakin University Human Research Ethics Committee.

This project will be carried out according to the *National Statement on Ethical Conduct in Human Research (2007)*. This statement has been developed to protect the interests of people who agree to participate in human research studies.

### 13 Further information and who to contact

The person you may need to contact will depend on the nature of your query.

If you want any further information concerning this project or if you have any problems which may be related to your involvement in the project, you can contact:

- The principal investigator: Prof Patricia Livingston on 03 9244 6609, or email [trish.livingston@deakin.edu.au](mailto:trish.livingston@deakin.edu.au)
- The project manager: Dr Natalie Heynsbergh on 03 92468225, or email: [n.heynsbergh@deakin.edu.au](mailto:n.heynsbergh@deakin.edu.au)

If you have any complaints about any aspect of the project, the way it is being conducted or any questions about being a research participant in general, then you may contact:

|                          |                                                              |
|--------------------------|--------------------------------------------------------------|
| Reviewing HREC name      | Peter MacCallum Cancer Centre Ethics Committee               |
| Project reference number | 20/53                                                        |
| HREC Executive Officer   | Ethics Coordinator                                           |
| Telephone                | 03 8559 7540                                                 |
| Email                    | <a href="mailto:ethics@petermac.org">ethics@petermac.org</a> |

### 14 What do I do if I want to participate?

If you would like to participate in this study, please log on to <https://mindonline.org.au>, to answer the eligibility questions and provide your consent to participate.



SPIRIT 2013 Checklist: Recommended items to address in a clinical trial protocol and related documents\*

| Section/item                      | Item No | Description                                                                                                                                                                                                                                                                              | Addressed on page number |
|-----------------------------------|---------|------------------------------------------------------------------------------------------------------------------------------------------------------------------------------------------------------------------------------------------------------------------------------------------|--------------------------|
| <b>Administrative information</b> |         |                                                                                                                                                                                                                                                                                          |                          |
| Title                             | 1       | Descriptive title identifying the study design, population, interventions, and, if applicable, trial acronym                                                                                                                                                                             | 1                        |
| Trial registration                | 2a      | Trial identifier and registry name. If not yet registered, name of intended registry                                                                                                                                                                                                     | 2                        |
|                                   | 2b      | All items from the World Health Organization Trial Registration Data Set                                                                                                                                                                                                                 | n/a                      |
| Protocol version                  | 3       | Date and version identifier                                                                                                                                                                                                                                                              | 2                        |
| Funding                           | 4       | Sources and types of financial, material, and other support                                                                                                                                                                                                                              | 23                       |
| Roles and responsibilities        | 5a      | Names, affiliations, and roles of protocol contributors                                                                                                                                                                                                                                  | 1                        |
|                                   | 5b      | Name and contact information for the trial sponsor                                                                                                                                                                                                                                       | 1                        |
|                                   | 5c      | Role of study sponsor and funders, if any, in study design; collection, management, analysis, and interpretation of data; writing of the report; and the decision to submit the report for publication, including whether they will have ultimate authority over any of these activities | 23                       |
|                                   | 5d      | Composition, roles, and responsibilities of the coordinating centre, steering committee, endpoint adjudication committee, data management team, and other individuals or groups overseeing the trial, if applicable (see Item 21a for data monitoring committee)                         | 23                       |

1 **Introduction**

2

3 Background and 6a Description of research question and justification for undertaking the trial, including summary of relevant 3-5  
 4 rationale studies (published and unpublished) examining benefits and harms for each intervention

5

6 6b Explanation for choice of comparators 6

7

8 Objectives 7 Specific objectives or hypotheses 5-6

9

10 Trial design 8 Description of trial design including type of trial (eg, parallel group, crossover, factorial, single group), 6  
 11 allocation ratio, and framework (eg, superiority, equivalence, noninferiority, exploratory)

12

13

14 **Methods: Participants, interventions, and outcomes**

15

16 Study setting 9 Description of study settings (eg, community clinic, academic hospital) and list of countries where data will 6, 8  
 17 be collected. Reference to where list of study sites can be obtained

18

19 Eligibility criteria 10 Inclusion and exclusion criteria for participants. If applicable, eligibility criteria for study centres and 8  
 20 individuals who will perform the interventions (eg, surgeons, psychotherapists)

21

22 Interventions 11a Interventions for each group with sufficient detail to allow replication, including how and when they will be 11-14  
 23 administered

24

25 11b Criteria for discontinuing or modifying allocated interventions for a given trial participant (eg, drug dose n/a  
 26 change in response to harms, participant request, or improving/worsening disease)

27

28 11c Strategies to improve adherence to intervention protocols, and any procedures for monitoring adherence 12-13, 16  
 29 (eg, drug tablet return, laboratory tests)

30

31 11d Relevant concomitant care and interventions that are permitted or prohibited during the trial 16

32

33

34 Outcomes 12 Primary, secondary, and other outcomes, including the specific measurement variable (eg, systolic blood  
 35 pressure), analysis metric (eg, change from baseline, final value, time to event), method of aggregation (eg, 15-17  
 36 median, proportion), and time point for each outcome. Explanation of the clinical relevance of chosen  
 37 efficacy and harm outcomes is strongly recommended

38

39

40 Participant timeline 13 Time schedule of enrolment, interventions (including any run-ins and washouts), assessments, and visits for 14  
 41 participants. A schematic diagram is highly recommended (see Figure)

42

43

44

45

46



|   |             |    |                                                                                                                                                                                       |    |
|---|-------------|----|---------------------------------------------------------------------------------------------------------------------------------------------------------------------------------------|----|
| 1 | Sample size | 14 | Estimated number of participants needed to achieve study objectives and how it was determined, including clinical and statistical assumptions supporting any sample size calculations | 19 |
| 2 |             |    |                                                                                                                                                                                       |    |
| 3 |             |    |                                                                                                                                                                                       |    |
| 4 | Recruitment | 15 | Strategies for achieving adequate participant enrolment to reach target sample size                                                                                                   | 9  |
| 5 |             |    |                                                                                                                                                                                       |    |

## 6 **Methods: Assignment of interventions (for controlled trials)**

### 7 Allocation:

|    |                    |     |                                                                                                                                                                                                                                                                                                                                                          |    |
|----|--------------------|-----|----------------------------------------------------------------------------------------------------------------------------------------------------------------------------------------------------------------------------------------------------------------------------------------------------------------------------------------------------------|----|
| 8  |                    |     |                                                                                                                                                                                                                                                                                                                                                          |    |
| 9  |                    |     |                                                                                                                                                                                                                                                                                                                                                          |    |
| 10 | Sequence           | 16a | Method of generating the allocation sequence (eg, computer-generated random numbers), and list of any factors for stratification. To reduce predictability of a random sequence, details of any planned restriction (eg, blocking) should be provided in a separate document that is unavailable to those who enrol participants or assign interventions | 10 |
| 11 | generation         |     |                                                                                                                                                                                                                                                                                                                                                          |    |
| 12 |                    |     |                                                                                                                                                                                                                                                                                                                                                          |    |
| 13 |                    |     |                                                                                                                                                                                                                                                                                                                                                          |    |
| 14 |                    |     |                                                                                                                                                                                                                                                                                                                                                          |    |
| 15 |                    |     |                                                                                                                                                                                                                                                                                                                                                          |    |
| 16 | Allocation         | 16b | Mechanism of implementing the allocation sequence (eg, central telephone; sequentially numbered, opaque, sealed envelopes), describing any steps to conceal the sequence until interventions are assigned                                                                                                                                                | 10 |
| 17 | concealment        |     |                                                                                                                                                                                                                                                                                                                                                          |    |
| 18 | mechanism          |     |                                                                                                                                                                                                                                                                                                                                                          |    |
| 19 |                    |     |                                                                                                                                                                                                                                                                                                                                                          |    |
| 20 | Implementation     | 16c | Who will generate the allocation sequence, who will enrol participants, and who will assign participants to interventions                                                                                                                                                                                                                                | 10 |
| 21 |                    |     |                                                                                                                                                                                                                                                                                                                                                          |    |
| 22 |                    |     |                                                                                                                                                                                                                                                                                                                                                          |    |
| 23 |                    |     |                                                                                                                                                                                                                                                                                                                                                          |    |
| 24 | Blinding (masking) | 17a | Who will be blinded after assignment to interventions (eg, trial participants, care providers, outcome assessors, data analysts), and how                                                                                                                                                                                                                | 10 |
| 25 |                    |     |                                                                                                                                                                                                                                                                                                                                                          |    |
| 26 |                    |     |                                                                                                                                                                                                                                                                                                                                                          |    |
| 27 |                    | 17b | If blinded, circumstances under which unblinding is permissible, and procedure for revealing a participant's allocated intervention during the trial                                                                                                                                                                                                     | 10 |
| 28 |                    |     |                                                                                                                                                                                                                                                                                                                                                          |    |
| 29 |                    |     |                                                                                                                                                                                                                                                                                                                                                          |    |
| 30 |                    |     |                                                                                                                                                                                                                                                                                                                                                          |    |

## 31 **Methods: Data collection, management, and analysis**

|    |                 |     |                                                                                                                                                                                                                                                                                                                                                                                                              |    |
|----|-----------------|-----|--------------------------------------------------------------------------------------------------------------------------------------------------------------------------------------------------------------------------------------------------------------------------------------------------------------------------------------------------------------------------------------------------------------|----|
| 32 |                 |     |                                                                                                                                                                                                                                                                                                                                                                                                              |    |
| 33 | Data collection | 18a | Plans for assessment and collection of outcome, baseline, and other trial data, including any related processes to promote data quality (eg, duplicate measurements, training of assessors) and a description of study instruments (eg, questionnaires, laboratory tests) along with their reliability and validity, if known. Reference to where data collection forms can be found, if not in the protocol | 14 |
| 34 | methods         |     |                                                                                                                                                                                                                                                                                                                                                                                                              |    |
| 35 |                 |     |                                                                                                                                                                                                                                                                                                                                                                                                              |    |
| 36 |                 |     |                                                                                                                                                                                                                                                                                                                                                                                                              |    |
| 37 |                 |     |                                                                                                                                                                                                                                                                                                                                                                                                              |    |
| 38 |                 |     |                                                                                                                                                                                                                                                                                                                                                                                                              |    |
| 39 |                 | 18b | Plans to promote participant retention and complete follow-up, including list of any outcome data to be collected for participants who discontinue or deviate from intervention protocols                                                                                                                                                                                                                    | 14 |
| 40 |                 |     |                                                                                                                                                                                                                                                                                                                                                                                                              |    |
| 41 |                 |     |                                                                                                                                                                                                                                                                                                                                                                                                              |    |
| 42 |                 |     |                                                                                                                                                                                                                                                                                                                                                                                                              |    |

|    |                                 |     |                                                                                                                                                                                                                                                                                                                                       |    |
|----|---------------------------------|-----|---------------------------------------------------------------------------------------------------------------------------------------------------------------------------------------------------------------------------------------------------------------------------------------------------------------------------------------|----|
| 1  | Data management                 | 19  | Plans for data entry, coding, security, and storage, including any related processes to promote data quality (eg, double data entry; range checks for data values). Reference to where details of data management procedures can be found, if not in the protocol                                                                     | 21 |
| 2  |                                 |     |                                                                                                                                                                                                                                                                                                                                       |    |
| 3  |                                 |     |                                                                                                                                                                                                                                                                                                                                       |    |
| 4  |                                 |     |                                                                                                                                                                                                                                                                                                                                       |    |
| 5  | Statistical methods             | 20a | Statistical methods for analysing primary and secondary outcomes. Reference to where other details of the statistical analysis plan can be found, if not in the protocol                                                                                                                                                              | 19 |
| 6  |                                 |     |                                                                                                                                                                                                                                                                                                                                       |    |
| 7  |                                 |     |                                                                                                                                                                                                                                                                                                                                       |    |
| 8  |                                 | 20b | Methods for any additional analyses (eg, subgroup and adjusted analyses)                                                                                                                                                                                                                                                              | 19 |
| 9  |                                 |     |                                                                                                                                                                                                                                                                                                                                       |    |
| 10 |                                 | 20c | Definition of analysis population relating to protocol non-adherence (eg, as randomised analysis), and any statistical methods to handle missing data (eg, multiple imputation)                                                                                                                                                       | 19 |
| 11 |                                 |     |                                                                                                                                                                                                                                                                                                                                       |    |
| 12 |                                 |     |                                                                                                                                                                                                                                                                                                                                       |    |
| 13 |                                 |     |                                                                                                                                                                                                                                                                                                                                       |    |
| 14 | <b>Methods: Monitoring</b>      |     |                                                                                                                                                                                                                                                                                                                                       |    |
| 15 |                                 |     |                                                                                                                                                                                                                                                                                                                                       |    |
| 16 | Data monitoring                 | 21a | Composition of data monitoring committee (DMC); summary of its role and reporting structure; statement of whether it is independent from the sponsor and competing interests; and reference to where further details about its charter can be found, if not in the protocol. Alternatively, an explanation of why a DMC is not needed | 21 |
| 17 |                                 |     |                                                                                                                                                                                                                                                                                                                                       |    |
| 18 |                                 |     |                                                                                                                                                                                                                                                                                                                                       |    |
| 19 |                                 |     |                                                                                                                                                                                                                                                                                                                                       |    |
| 20 |                                 |     |                                                                                                                                                                                                                                                                                                                                       |    |
| 21 |                                 |     |                                                                                                                                                                                                                                                                                                                                       |    |
| 22 |                                 | 21b | Description of any interim analyses and stopping guidelines, including who will have access to these interim results and make the final decision to terminate the trial                                                                                                                                                               | 21 |
| 23 |                                 |     |                                                                                                                                                                                                                                                                                                                                       |    |
| 24 |                                 |     |                                                                                                                                                                                                                                                                                                                                       |    |
| 25 | Harms                           | 22  | Plans for collecting, assessing, reporting, and managing solicited and spontaneously reported adverse events and other unintended effects of trial interventions or trial conduct                                                                                                                                                     | 21 |
| 26 |                                 |     |                                                                                                                                                                                                                                                                                                                                       |    |
| 27 |                                 |     |                                                                                                                                                                                                                                                                                                                                       |    |
| 28 |                                 |     |                                                                                                                                                                                                                                                                                                                                       |    |
| 29 | Auditing                        | 23  | Frequency and procedures for auditing trial conduct, if any, and whether the process will be independent from investigators and the sponsor                                                                                                                                                                                           | 21 |
| 30 |                                 |     |                                                                                                                                                                                                                                                                                                                                       |    |
| 31 |                                 |     |                                                                                                                                                                                                                                                                                                                                       |    |
| 32 |                                 |     |                                                                                                                                                                                                                                                                                                                                       |    |
| 33 | <b>Ethics and dissemination</b> |     |                                                                                                                                                                                                                                                                                                                                       |    |
| 34 |                                 |     |                                                                                                                                                                                                                                                                                                                                       |    |
| 35 | Research ethics approval        | 24  | Plans for seeking research ethics committee/institutional review board (REC/IRB) approval                                                                                                                                                                                                                                             | 24 |
| 36 |                                 |     |                                                                                                                                                                                                                                                                                                                                       |    |
| 37 |                                 |     |                                                                                                                                                                                                                                                                                                                                       |    |
| 38 | Protocol amendments             | 25  | Plans for communicating important protocol modifications (eg, changes to eligibility criteria, outcomes, analyses) to relevant parties (eg, investigators, REC/IRBs, trial participants, trial registries, journals, regulators)                                                                                                      | 21 |
| 39 |                                 |     |                                                                                                                                                                                                                                                                                                                                       |    |
| 40 |                                 |     |                                                                                                                                                                                                                                                                                                                                       |    |
| 41 |                                 |     |                                                                                                                                                                                                                                                                                                                                       |    |
| 42 |                                 |     |                                                                                                                                                                                                                                                                                                                                       |    |
| 43 |                                 |     |                                                                                                                                                                                                                                                                                                                                       |    |
| 44 |                                 |     |                                                                                                                                                                                                                                                                                                                                       |    |
| 45 |                                 |     |                                                                                                                                                                                                                                                                                                                                       |    |
| 46 |                                 |     |                                                                                                                                                                                                                                                                                                                                       |    |

|    |                               |     |                                                                                                                                                                                                                                                                                     |          |
|----|-------------------------------|-----|-------------------------------------------------------------------------------------------------------------------------------------------------------------------------------------------------------------------------------------------------------------------------------------|----------|
| 1  | Consent or assent             | 26a | Who will obtain informed consent or assent from potential trial participants or authorised surrogates, and how (see Item 32)                                                                                                                                                        | 10       |
| 2  |                               |     |                                                                                                                                                                                                                                                                                     |          |
| 3  |                               |     |                                                                                                                                                                                                                                                                                     |          |
| 4  |                               | 26b | Additional consent provisions for collection and use of participant data and biological specimens in ancillary studies, if applicable                                                                                                                                               | n/a      |
| 5  |                               |     |                                                                                                                                                                                                                                                                                     |          |
| 6  |                               |     |                                                                                                                                                                                                                                                                                     |          |
| 7  | Confidentiality               | 27  | How personal information about potential and enrolled participants will be collected, shared, and maintained in order to protect confidentiality before, during, and after the trial                                                                                                | 21       |
| 8  |                               |     |                                                                                                                                                                                                                                                                                     |          |
| 9  |                               |     |                                                                                                                                                                                                                                                                                     |          |
| 10 | Declaration of interests      | 28  | Financial and other competing interests for principal investigators for the overall trial and each study site                                                                                                                                                                       | 24       |
| 11 |                               |     |                                                                                                                                                                                                                                                                                     |          |
| 12 |                               |     |                                                                                                                                                                                                                                                                                     |          |
| 13 | Access to data                | 29  | Statement of who will have access to the final trial dataset, and disclosure of contractual agreements that limit such access for investigators                                                                                                                                     | 21       |
| 14 |                               |     |                                                                                                                                                                                                                                                                                     |          |
| 15 |                               |     |                                                                                                                                                                                                                                                                                     |          |
| 16 | Ancillary and post-trial care | 30  | Provisions, if any, for ancillary and post-trial care, and for compensation to those who suffer harm from trial participation                                                                                                                                                       | 21       |
| 17 |                               |     |                                                                                                                                                                                                                                                                                     |          |
| 18 |                               |     |                                                                                                                                                                                                                                                                                     |          |
| 19 |                               |     |                                                                                                                                                                                                                                                                                     |          |
| 20 | Dissemination policy          | 31a | Plans for investigators and sponsor to communicate trial results to participants, healthcare professionals, the public, and other relevant groups (eg, via publication, reporting in results databases, or other data sharing arrangements), including any publication restrictions | 21       |
| 21 |                               |     |                                                                                                                                                                                                                                                                                     |          |
| 22 |                               |     |                                                                                                                                                                                                                                                                                     |          |
| 23 |                               |     |                                                                                                                                                                                                                                                                                     |          |
| 24 |                               | 31b | Authorship eligibility guidelines and any intended use of professional writers                                                                                                                                                                                                      | 21       |
| 25 |                               |     |                                                                                                                                                                                                                                                                                     |          |
| 26 |                               | 31c | Plans, if any, for granting public access to the full protocol, participant-level dataset, and statistical code                                                                                                                                                                     | 21       |
| 27 |                               |     |                                                                                                                                                                                                                                                                                     |          |
| 28 |                               |     |                                                                                                                                                                                                                                                                                     |          |
| 29 | <b>Appendices</b>             |     |                                                                                                                                                                                                                                                                                     |          |
| 30 |                               |     |                                                                                                                                                                                                                                                                                     |          |
| 31 | Informed consent materials    | 32  | Model consent form and other related documentation given to participants and authorised surrogates                                                                                                                                                                                  | attached |
| 32 |                               |     |                                                                                                                                                                                                                                                                                     |          |
| 33 |                               |     |                                                                                                                                                                                                                                                                                     |          |
| 34 | Biological specimens          | 33  | Plans for collection, laboratory evaluation, and storage of biological specimens for genetic or molecular analysis in the current trial and for future use in ancillary studies, if applicable                                                                                      | n/a      |
| 35 |                               |     |                                                                                                                                                                                                                                                                                     |          |
| 36 |                               |     |                                                                                                                                                                                                                                                                                     |          |

\*It is strongly recommended that this checklist be read in conjunction with the SPIRIT 2013 Explanation & Elaboration for important clarification on the items. Amendments to the protocol should be tracked and dated. The SPIRIT checklist is copyrighted by the SPIRIT Group under the Creative Commons [“Attribution-NonCommercial-NoDerivs 3.0 Unported”](https://creativecommons.org/licenses/by-nc-nd/3.0/) license.
